# Supplementary material for: Identifying and measuring the severity of somatic symptom disorder using the Self-reported Somatic Symptom Scale-China (SSS-CN): a research protocol for a diagnostic study
Source: PubMed Central journal article supplement — BMJ Open. 2019 Sep 26;9(9):e024290. doi: 10.1136/bmjopen-2018-024290 (PMC6773285; doi:10.1136/bmjopen-2018-024290), 2019-09-26

# BMJ Open

BMJ Open is committed to open peer review. As part of this commitment we make the peer review history of every article we publish publicly available.

When an article is published we post the peer reviewers' comments and the authors' responses online. We also post the versions of the paper that were used during peer review. These are the versions that the peer review comments apply to.

The versions of the paper that follow are the versions that were submitted during the peer review process. They are not the versions of record or the final published versions. They should not be cited or distributed as the published version of this manuscript.

BMJ Open is an open access journal and the full, final, typeset and author-corrected version of record of the manuscript is available on our site with no access controls, subscription charges or pay-per-view fees (<http://bmjopen.bmj.com>).

If you have any questions on BMJ Open's open peer review process please email [info.bmjopen@bmj.com](mailto:info.bmjopen@bmj.com)

# BMJ Open

## Somatic Symptom Scale-China (SSS-Ch) study: protocol for measurement and severity evaluation of a self-report version of a somatic symptom questionnaire in a general hospital in China

|                               |                                                                                                                                                                                                                                                                                                                                                                                                                                                                                                                                                                                                   |
|-------------------------------|---------------------------------------------------------------------------------------------------------------------------------------------------------------------------------------------------------------------------------------------------------------------------------------------------------------------------------------------------------------------------------------------------------------------------------------------------------------------------------------------------------------------------------------------------------------------------------------------------|
| Journal:                      | <i>BMJ Open</i>                                                                                                                                                                                                                                                                                                                                                                                                                                                                                                                                                                                   |
| Manuscript ID                 | bmjopen-2018-024290                                                                                                                                                                                                                                                                                                                                                                                                                                                                                                                                                                               |
| Article Type:                 | Protocol                                                                                                                                                                                                                                                                                                                                                                                                                                                                                                                                                                                          |
| Date Submitted by the Author: | 28-May-2018                                                                                                                                                                                                                                                                                                                                                                                                                                                                                                                                                                                       |
| Complete List of Authors:     | Su, Xuan; Renji Hospital, School of Medicine, Shanghai Jiaotong University, Department of Cardiology<br>Zhang, Weituo; Clinical Research Center, School of Medicine, Shanghai Jiaotong University<br>Gao, Chuang; Clinical Research Center, School of Medicine, Shanghai Jiaotong University<br>Mao, Jialiang; Renji Hospital, School of Medicine, Shanghai Jiaotong University, Department of Cardiology<br>Jiang, Meng; Renji Hospital, School of Medicine, Shanghai Jiaotong University, Department of Cardiology<br>Pu, Jun; Renji Hospital, School of Medicine, Shanghai Jiaotong University |
| Keywords:                     | Somatic Symptom Scale-China, somatic symptom disorder, mental disorders management                                                                                                                                                                                                                                                                                                                                                                                                                                                                                                                |
|                               |                                                                                                                                                                                                                                                                                                                                                                                                                                                                                                                                                                                                   |

SCHOLARONE™  
Manuscripts

only

1  
2  
3 **Somatic Symptom Scale-China (SSS-Ch) study: protocol for measurement**  
4  
5 **and severity evaluation of a self-report version of a somatic symptom**  
6  
7 **questionnaire in a general hospital in China**  
8  
9

10 Xuan Su<sup>a1</sup>, MD, Weituo Zhang<sup>a2</sup>, PhD, Chuang Gao, MPH<sup>2</sup>, Jialiang Mao<sup>\*1</sup>, MD, PhD, Meng  
11  
12 Jiang<sup>\*1</sup>, MD, PhD, Jun Pu<sup>\*1</sup>, MD, PhD  
13

14 <sup>1</sup> Department of Cardiology, Renji Hospital, School of Medicine, Shanghai Jiaotong  
15 University, Shanghai, China 200127;  
16

17  
18 <sup>2</sup> Clinical Research Center, School of Medicine, Shanghai Jiaotong University, Shanghai,  
19 China 200025  
20  
21  
22

23  
24  
25 <sup>a</sup> Co-first author: Xuan Su and Weituo Zhang contribute equally to the paper.  
26

27  
28 \* Name and address for co-correspondence: Meng Jiang, MD, Ph.D., FSCMR; Jialiang Mao,  
29 MD, Ph.D.; and Jun Pu, MD, Ph.D., FACC. Department of Cardiology, Renji Hospital,  
30 School of Medicine, Shanghai Jiaotong University, Shanghai, China; 160 Pujian Road,  
31 Shanghai, China, 200127. Tel: 086-21-68383447, Fax: 086-21-68383447; Email:  
32 [jiangmeng0919@163.com](mailto:jiangmeng0919@163.com); [maojl@aliyun.com](mailto:maojl@aliyun.com) and [pujun310@hotmail.com](mailto:pujun310@hotmail.com) .  
33  
34  
35  
36  
37  
38  
39

40 **Word count:** 3498  
41  
42  
43  
44  
45  
46  
47  
48  
49  
50  
51  
52  
53  
54  
55  
56  
57  
58  
59  
60

## ABSTRACT

**Aim** The current self-reporting questionnaires neither sufficiently consider accompanying anxiety and depression nor are validated for monitoring the treatment efficacy of the patients with somatic symptom disorder (SSD). The Somatic Symptom Scale-China (SSS-Ch) questionnaire was developed due to the urgent clinical demand in general hospitals. We attempt to determine if this self-administered SSS-Ch could serve as a timely and practical instrument to detect SSD and to assess the severity of this disorder.

**Methods/Design** A prospective diagnostic study conducted at 3 centres. Patients without organic disease but presenting with physical discomfort will be recruited and undertake the SSS-Ch, the Patient Health Questionnaire-15 (PHQ-15), the Patient Health Questionnaire-9 (PHQ-9) and the Generalized Anxiety Disorder Scale-7 (GAD-7) checklists. An independent diagnosis will be made by a primary care physician using the fifth edition of the Diagnostic and Statistical Manual of Mental Disorders (DSM-5) criterion standards. Patient with SSD will be selectively prescribed according to the severity category assessed by physician, selective serotonin reuptake inhibitors or serotonin–norepinephrine reuptake inhibitors. Two-, 6-, and 10-week follow-ups will be scheduled for repeating the questionnaires in patient with SSD. The primary outcomes will be diagnosis and severity assessment accuracy of SSD. Secondary outcomes will be whether the SSS-Ch is effective in monitoring treatment efficacy of SSD in primary care patients, whether the current cut-off value needs to be optimized, and how often somatic disorder is accompanied by anxiety or depression.

**Ethics and dissemination** Ethical approval was provided by the Renji Hospital Human Research Ethics Committee, approval number 2015016. The findings of this study will be disseminated via peer-reviewed journals and presented at international conferences.

### Strengths and limitations of this study

1. A strength of this study is that solid validation is achieved. The SSS-Ch is designed to be double verified by both the DSM-5 and treatment efficacy.
2. It is suitable for Chinese national conditions.
3. 50% of the items in the SSS-Ch are designed for depression or anxiety since it is stated in the DSM-5 that SSD can be accompanied by depression or anxiety.
4. The current SSS-Ch study is further modified based on the DSM-5 and, for the first time, is applied for evaluating its clinical utility.
5. A potential limitation of this study is that our current study only represents the efficacy of SSS-Ch utility in patients without organic diseases, and the study was designed as a midterm investigation with four measurement points, so missing data are to be considered.

### Keywords

Somatic Symptom Scale-China; somatic symptom disorder; mental disorders management.

## INTRODUCTION

One of the most common medical conditions seen in general hospitals is somatic symptom disorder (SSD)<sup>1 2</sup>. SSD refers to symptoms reported by patients that often difficult to explain after adequate evaluation<sup>3</sup>, and even when significant medical disease is present, the patients' symptoms may nonetheless be unrelated to their disease<sup>2</sup>. Cardiac neurosis, irritable bowel syndrome, fibromyalgia, and chronic fatigue syndrome are related terms to describe these "functional diseases" in various clinical departments, while "SSD" is the term used in the field of psychiatry and psychology (ICD-10, DSM-5)<sup>2 4</sup>. The disorder has an estimated current prevalence in the general population of 1% to 19%<sup>2</sup> and in general medical practice of 16% to 30%<sup>5-7</sup>. Up to 70-80% of patients choose to visit a general hospital instead of a psychiatric clinic<sup>2</sup>. The recognition rate is unsatisfactory due to the diagnostic complexity; therefore, patients would sustain somatic symptoms without appropriate treatment due to the lack of awareness or effective screening instruments for SSD. Patients with somatization had approximately twice the outpatient and inpatient medical care utilization and twice the annual medical care costs as non-somatizing patients. An estimated \$256 billion in annual medical care cost is attributable to the incremental effects of somatization alone<sup>1</sup>. Whereas depression and anxiety disorders are widely researched, SSD has been far less studied. Follow-up or treatment studies of this kind are even scarcer. Hence, it is of great importance for primary care physicians to be prepared to, in a timely manner, identify as well as grade symptom severity and treat SSD, which can result in high degrees of morbidity, lost productivity, and overutilization of medical resources<sup>8 9</sup>.

The fifth edition of the Diagnostic and Statistical Manual of Mental Disorders (DSM-5) is currently the "gold standard" for the diagnosis of SSD<sup>2</sup>, with the aim of avoiding the omission of patients and assessing the disorder severity. The DSM-5 criteria emphasized that it is important to evaluate patients in terms of psychology, behaviour and their body

1  
2  
3 conditions and then treat the patients according to the severity of the disorder. The DSM-5,  
4  
5 however, is hard to follow clinically since it depends on qualified and experienced physicians  
6  
7 with an interview longer than half an hour. It is more clinically practical to detect a disorder  
8  
9 by self-administered questionnaires, where patients can score symptoms according to their  
10  
11 own condition and severity in a short time. The most available questionnaires are the Patient  
12  
13 Health Questionnaire-9 (PHQ-9)<sup>10</sup> and the Generalized Anxiety Disorder Scale-7 (GAD-7)<sup>11</sup>.  
14  
15 The PHQ-9 is used for assessing depression, and the GAD-7 is focused on anxiety. Both are  
16  
17 widely used in clinical practice and research, but it remains unknown whether they can be  
18  
19 used for screening SSD. The Patient Health Questionnaire-15 (PHQ-15)<sup>12</sup> and its simplified  
20  
21 version—the Somatic Symptom Scale-8 (SSS-8)<sup>13</sup>—were developed in recent years, aiming  
22  
23 to provide a reference for physicians to detect suspected somatic burden quickly in health  
24  
25 care visits. However, their efficacy for treatment evaluation is unclear. In addition, it is stated  
26  
27 in the DSM-5 that SSD could be accompanied by depression or anxiety. Approximately  
28  
29 57.7% of SSD patients had comorbid anxiety or depressive disorder, as reported by Arthur et  
30  
31 al.<sup>1</sup>, but there are just 2 items related to depression on the PHQ-15 and SSS-8 scales. We  
32  
33 developed a self-administered questionnaire, the SSS-Ch, that integrates somatic symptoms  
34  
35 with depression and anxiety items. It is designed to aid in screening for SSD diagnosis, SSD  
36  
37 burden assessment and follow-up monitoring.  
38  
39  
40  
41

42 The Somatic Symptom Scale-China (SSS-Ch) was developed based on the DSM-5 to  
43  
44 investigate suspected SSD. It is an abbreviated 20-item version of somatic symptoms that can  
45  
46 be entirely self-administered by the patient. The SSS-Ch is designed to assess the presence  
47  
48 and severity of common somatic symptoms. Our previous study validated its reliability and  
49  
50 validity<sup>14</sup>. Items in the scale include somatic symptoms (50%, 10/20 items), anxiety (20%,  
51  
52 4/20 items), depression (20%, 4/20 items), and anxiety and depression (10%, 2/20 items).  
53  
54 Unlike the severity category from the DSM-5, the severity assessment of the SSS-Ch is based  
55  
56  
57  
58  
59  
60

1  
2  
3 on both individual items and the general evaluation. In addition, it is specified in each item  
4 and avoids certain questions to accommodate Chinese culture. The SSS-Ch is designed to be  
5 administered to outpatients in internal medicine. It aims to establish a more accessible and  
6  
7 affordable way to increase the health of patients.  
8  
9  
10

## 11 **Study objectives and research questions**

### 12 **Primary objectives**

13  
14  
15 The primary objectives of this study are to test the clinical utility: (1) Diagnostic accuracy:  
16 we expect that with a DSM-5-referenced physician diagnosis as the gold standard, somatic  
17 symptom disorder assessed by the SSS-Ch will be as accurate as the current PHQ-15  
18 evaluation. (2) Somatic burden assessment: we expect to use the SSS-Ch for measuring SSD  
19 severity.  
20  
21  
22  
23  
24  
25  
26  
27

### 28 **Secondary objectives**

29  
30  
31 Secondary objectives include the following: (1) We intend to observe the characteristics of  
32 the SSS-Ch for its efficacy in monitoring the treatment effect in primary care patients. In  
33 detail, we intend to explore whether the SSS-Ch is non-inferior compared to the PHQ-15,  
34 PHQ-9, or GAD-7 and to determine in which aspect the SSS-Ch has an advantage. (2) We  
35 intend to evaluate whether the current cut-off value needs to be optimized. (3) We aim to  
36  
37 determine how often SSD is accompanied by anxiety or depression or in which circumstances  
38  
39  
40  
41  
42  
43  
44  
45  
46  
47  
48  
49  
50  
51  
52  
53  
54  
55  
56  
57  
58  
59  
60  
SSD is accompanied by anxiety or depression.



## METHODS

### Study overview

This study will use a prospective interventional diagnostic design and will be conducted in the internal medicine department at 3 sites of a tertiary general hospital in Shanghai, China. This study protocol was approved by the ethics committees of Renji Hospital, and written informed consent will be obtained from all study participants. Clinical trial registration can be found at <https://register.clinicaltrials.gov/>, and the registration number is NCT03513185.

Particular attention will be paid to ensure the appropriate storage of this study. Patient and reviewer confidentiality will be maintained, and no identifying features will be published. The protocol development is adhered to the EMA guideline for diagnosis study<sup>15</sup>.

### Description of the SSS-Ch and Assessment of Severity

The SSS-Ch is a somatic symptom scale (**Figure 1**) we derived from the DSM-5. It queries approximately 10 somatic clusters that account for 50% of the physical complaints (1 item per body system). Another 50% composes the anxiety and depression items (anxiety, 20% (4/20); depression, 20% (4/20); anxiety and depression, 10%). Subjects are asked the following: “Since you have felt unwell, how often have you been bothered by any of the following problems?” For scoring, subjects are asked to rate the severity of each symptom as 1 (“does not exist”), 2 (“bearable”), 3 (“influences daily work to some extent”) or 4 (“unbearable”). Thus, in determining the SSS-Ch score, each individual symptom is coded as 1-4, and the total score ranges from 20 to 80. Severity categories are assessed in accordance with SSS-Ch percentile ranks. SSS-Ch scores within cut-off points of normal range-39, 40-59, and  $\geq 60$  represent mild, moderate, and severe SSD. The selection of these cut-off values takes into account the results of our previous study (a reliability and validity study of the early version of SSS-Ch)<sup>4</sup> and clinical experience.

## Study Design

Consecutive outpatients complaining about physical discomfort will first undergo corresponding examinations. For patients with no systemic disease that can account for their discomfort, the patient will be considered to have a probability of somatic disorder. Patients will then be transferred to a specialist clinic for suspected SSD. Before seeing their physicians, patients will undertake the SSS-Ch, the PHQ-15, the PHQ-9 and the GAD-7 questionnaires, and non-clinical research assistants will collect the questionnaires and determine the scores. A physician who is blind to the results of the SSS-Ch will separately evaluate the patient and will give prescriptions according to the DSM-5 severity category. Two-, 6-, 10-week follow-ups will be scheduled for repeating the questionnaires for patient with medications. A 20-Item Short Form Health Survey (SF-20) will be conducted as the healthy reference during follow-up. A study flow chart is shown in **Figure 2**.

## Participants and procedure

### Inclusion criteria

(1) patients aged 18-80 years old; (2) patients who have no previous diagnosis of somatic disease; (3) patients without systemic disease that can account the physical discomfort; (4) patients who agree to complete the checklists and undergo assessment by a physician.

### Exclusion criteria

(1) patients who have lost their self-assessed abilities or refuse to participate; (2) patients who have been previously confirmed to have serious mental disorders, mental retardation or dementia; (3) patients who are taking anti-anxiety agents or anti-depression agents; (4) patients who are unable to complete at least 1 follow-up.

### Blinding

1  
2  
3 After a patient with suspected SSD is transferred to the specialist clinic, the patient will first  
4 complete the questionnaires in a separate room; then, an initial consultation will be blindly  
5 conducted by a physician who has been qualified as a National Psychological counsellor. An  
6 independent diagnosis and severity category will be assigned by the physician using the  
7 DSM-5 criterion standard. The time of the self-report scale and the physician assessment will  
8 be separately recorded.  
9  
10  
11  
12  
13  
14

### 15 16 **Intervention**

17  
18 Medications will be given according to the physician's evaluation. Anti-anxiety treatment or  
19 anti-depression treatment will be selectively administered according to the severity of  
20 somatic symptom burden. Generally, members of the thioxanthene class, such as Deanxit,  
21 that are used as mild, selective serotonin reuptake inhibitors (SSRIs) are applied for moderate  
22 symptoms, and serotonin-norepinephrine reuptake inhibitors (SNRIs) are applied for severe  
23 symptoms based on the DSM-5, with the serotonin antagonist and reuptake inhibitor (SARI)  
24 class prescribed if sleeping problems exist.  
25  
26  
27  
28  
29  
30  
31  
32  
33

### 34 **Follow-up**

35  
36 A face-to-face interview will be scheduled at 2, 6, and 10 weeks for patients taking  
37 medication in order to follow-up using the SSS-Ch, PHQ-15, PHQ-9 and GAD-7  
38 questionnaires. An SF-20 survey will be conducted as the healthy reference to evaluate  
39 patient status.  
40  
41  
42  
43  
44  
45

### 46 **Outcome measures**

#### 47 **Reliability & Validity**

48  
49 Reliability will be measured by the Cronbach's alpha. A randomized sample of  
50 approximately 100 participants will be asked to complete the checklists 1 week after the  
51 initial completion to analyse the test-retest reliability.  
52  
53  
54  
55  
56  
57  
58  
59  
60

1  
2  
3 Criterion validity will be calculated by the correlations of the diagnostic results and severity  
4 assessments of somatic symptoms between the SSS-Ch and the gold standard.  
5

6  
7 Construct validity will be tested by confirmatory factorial analysis comparing corresponding  
8 factors with the PHQ-15, PHQ-9 and GAD-7. (The SSS-Ch consists of 10 questions for  
9 somatic symptom, 4 for depression, 4 for anxiety, and 2 for depression-anxiety.)  
10  
11

#### 12 13 14 Diagnostic performance

15  
16 Diagnostic accuracy of a questionnaire is measured by the AUC of an ROC curve, the  
17 sensitivity / specificity under given cut-off values, and the positive / negative predictive  
18 values in the study population, referring to the physician diagnosis as the gold standard.  
19  
20

21  
22 Accuracy of severity assessment of a questionnaire is measured by the Spearman correlation  
23 between the questionnaire score and the physician's severity assessment.  
24  
25

#### 26 27 28 Other Clinical utilities

29  
30 Convenience in clinical practice is measured by the average time taken to complete each  
31 questionnaire or receive a diagnosis from a physician.  
32  
33

34  
35 Clinical utility in monitoring treatment efficacy of SSD in primary care patients is measured  
36 by correlation with the reference SF-20 during follow-up visits.  
37  
38

#### 39 40 41 **Sample size calculation**

42  
43 The calculation considers the sample sizes for both the comparison of SSD diagnosis and the  
44 severity assessment, whichever one was larger. In the pilot study, the prevalence of SSD was  
45 76.9% in the study population who were referred to the special clinics, the AUC of the ROC  
46 curve for PHQ15 was 0.88, and the correlation of the PHQ15 score with the physician's  
47 diagnosis was 0.77 (95%CI: 0.43, 0.92). The correlation of SSS-CH and PHQ15 scores was  
48 set to 0.6. With a non-inferiority margin of 0.05,  $\alpha=0.025$ , and  $\beta=0.8$ , the sample size for SSD  
49 diagnosis was 852. With a non-inferiority margin of 0.1,  $\alpha=0.025$ , and  $\beta=0.8$ , the sample size  
50  
51  
52  
53  
54  
55  
56  
57  
58  
59  
60

1  
2  
3 for severity assessment was 579. Therefore, as the overall sample size of this study was  
4 N=852 with SSD-positive N+=655, and SSD-negative N-=197, both the positive and negative  
5 sample size requirements were met.  
6  
7

### 8 9 **Statistical analysis**

10 We will compute the mean (SD) questionnaire scores and the number of patients (%) in each  
11 diagnostic category as descriptive statistics.  
12  
13

14 Reliability will be measured using Cronbach's  $\alpha$ . The criterion validity will be measured by  
15 the kappa coefficient of diagnosis and the Kendall tau-b of severity assessment. Construct  
16 validity will be tested using confirmatory factor analyses.  
17  
18

19 The primary analysis of the diagnostic performance will consist of two comparisons using  
20 Bonferroni correction: (1) the non-inferior comparison of SSS-Ch with PHQ-15 in the SSD  
21 diagnostic accuracy as measured by the AUC of ROC with  $\Delta=0.05$ ,  $\alpha=0.025$  in the whole  
22 study population; (2) the non-inferior comparison of SSS-Ch with PHQ-15 in the SSD  
23 severity assessment measured by Spearman's correlation with  $\Delta=0.1$ ,  $\alpha=0.025$  in the  
24 population with a confirmed SSD diagnosis. Both comparisons refer to the physician's  
25 diagnosis as the gold standard. If either non-inferior is met, the corresponding superior will  
26 be tested.  
27  
28  
29  
30  
31  
32  
33  
34  
35  
36  
37  
38  
39  
40  
41

42 As a secondary analysis, the sensitivity, specificity, and positive and negative predictive  
43 values will also be reported. We will further optimize and validate the cut-off values of the  
44 SSS-Ch. In addition, we will compare the time to complete each questionnaire and be  
45 diagnosed by a physician and will compare the correlation between questionnaire scores and  
46 the quality of life (SF-20) in the follow-up data.  
47  
48  
49  
50  
51

52 Sensitivity analysis will be conducted by comparing the analysis results with and without  
53 sex and age adjustment. Missing values will be imputed with a state-of-the-art technique<sup>16</sup>.  
54  
55  
56  
57  
58  
59  
60

## Patient and public involvement statement

### Development of the research question

Up to 70-80% of patients with SSD visit a general hospital instead of a psychiatric clinic. The current self-reporting questionnaires neither sufficiently consider accompanying anxiety and depression nor are validated for monitoring the treatment efficacy of such groups. The SSS-Ch questionnaire was developed due to the urgent clinical demand in general hospitals.

Outcome measures informed by patients' priorities, experience, and preferences.

Research assistant will be dedicated to help patient understand the questions. We also take care of the patients' comfort in completing the questionnaires including the set of questionnaires needed, special clinic prepared, patient privacy protection.

### Patients involvement in the design of this study

Patients were got involved in the following aspects in the design of this study: the understandability, acceptability of the language of the questionnaires, the number of questionnaires, the acceptable time to complete the questionnaires, the follow-up method, the manner of notification of the disease condition, the manner of feedback during the research process.

### Patient involvement in the recruitment and conduct of the study

Patient are allowed to recommend other potential study candidates. We also encourage patients to give feedback on issues in the early and mid-term phase of the study.

### Study dissemination to study participants

Patients will be informed of the results immediately after the physician consultant and the questionnaire are completed. Patients will communicate with the doctor throughout the

1  
2  
3 diagnosis and treatment. The study results will be written and submitted for publication in  
4  
5 peer-reviewed journals. Patients can get the published article for personal use.  
6

7  
8 **Current status**  
9

10 The first study participant was enrolled in November 2017. In May 2018, patient recruitment  
11  
12 was not completed.  
13  
14  
15  
16  
17  
18  
19  
20  
21  
22  
23  
24  
25  
26  
27  
28  
29  
30  
31  
32  
33  
34  
35  
36  
37  
38  
39  
40  
41  
42  
43  
44  
45  
46  
47  
48  
49  
50  
51  
52  
53  
54  
55  
56  
57  
58  
59  
60

## DISCUSSION

In this study protocol, we describe a diagnostic study design that evaluates the efficacy of a newly developed somatic symptom scale from China for patients with suspected somatic diseases, which might be applied as a first-line instrument for screening and monitoring the treatment efficacy in individual outpatient consultations. We expect that a study physician will benefit from the SSS-Ch on a clinically significant level in a timely manner and that the participants will benefit from improving their awareness and self-monitoring of the disease. Moreover, we will examine the characteristics of the SSS-Ch compared with other somatic symptom questionnaires.

Our SSS-Ch is designed as a “one-stop shop” tool that combines somatic items with mental disorder items. This is consistent with the suggestion in the DSM-5 that somatic symptoms are likely accompanied by depression and anxiety<sup>1</sup>. Somatic symptoms may interleave with mental items, and the mental symptoms may be triggered differently from conventional mental diseases in this group. Clinically, it is not easy to clearly separate body from mental status, and each item’s significance is unknown. We caution that 50% of mental items have the possibility of increasing the incidence of SSD, and a subgroup score with somatic symptom items alone is used for this appraisal.

This trial had some limitations. First, SSD can be accompanied by diagnosed medical disorders. Our current study, however, only represents the efficacy of SSS-Ch utility in patients without organic diseases. With this in mind, further application of the SSS-Ch in specific diseases should be separately investigated. Second, the study was designed as a mid-term investigation with four measurement points, so missing data are to be considered. Referring to the fact that only 16% of patients in the PRIME-MD study (primary care evaluation of mental disorders study) were involved in follow-up<sup>17</sup>, we estimate that a high rate of missing data will occur in patients with SSD. Fortunately, each subject in our study



1  
2  
3 will undergo the same set of questionnaires for the entire scale, so the missing samples who  
4  
5 are lost to follow-up will not differ among the groups and therefore will not produce  
6  
7 significant bias and will not affect our assessment.  
8

9  
10 The study had several strengths. First, solid validation is achieved. The SSS-Ch is designed  
11  
12 to be double verified by both the DSM-5 and treatment efficacy. Second, it is suitable for  
13  
14 national conditions. Considering Chinese culture, we modified some items such as sexual  
15  
16 discomfort into “discomfort at the below region”, and each item was detailed for subjects to  
17  
18 choose in order not to miss a patient’s ailment or promote sensitivity. Third, 50% of the items  
19  
20 in the SSS-Ch are designed for depression or anxiety since it is stated in the DSM-5 that SSD  
21  
22 can be accompanied by depression or anxiety. Finally, our previous study has shown the  
23  
24 reliability and factorial validity of the SSS-Ch by utilizing an early version of SSS-Ch<sup>14</sup>. The  
25  
26 current study is further modified based on the DSM-5 and, for the first time, is applied for  
27  
28 evaluating its clinical utility.  
29

30  
31 This study will help to clarify whether the developed SSS-Ch score is an effective tool for  
32  
33 rapid screening and assessment of severity in patients with suspected SSD in a general  
34  
35 hospital clinic and for convenient follow-up. If the SSS-Ch turns out to be effective, it can be  
36  
37 implemented as a first-line screen and follow-up option for outpatient use to provide  
38  
39 personalized information to consulting physician in a timely manner. The study results will  
40  
41 contribute to better outpatient care for SSD.  
42  
43  
44  
45  
46  
47  
48  
49  
50  
51  
52  
53  
54  
55  
56  
57  
58  
59  
60

1  
2  
3 **Acknowledgements:** We thank for the contribution of all the patients to participate and give  
4 us advises throughout the study design and conduct.  
5

6  
7 **Conflict of interests:** The authors declare that they have no competing interests.  
8

9 **Ethics approval:** Ethical approval was provided by the Renji Hospital Human Research  
10 Ethics Committee, approval number 2015016.  
11

12  
13 **Consent for publication:** All participants provided written informed consent.  
14

15 **Authors' contributions:** XS: design and conduction of study, acquisition of data, analysis  
16 and interpretation of data, drafting the manuscript. WTZ: analysis, statistics and interpretation  
17 of data, drafting the manuscript. CG: analysis, statistics and interpretation of data. JLM:  
18 made substantial contributions to conception, design and interpretation of data. Revising it  
19 critically for important intellectual content. MJ: made substantial contributions to conception,  
20 design and interpretation of data. Revising it critically for important intellectual content. JP:  
21 made substantial contributions to conception, design and interpretation of data.  
22  
23  
24  
25  
26  
27  
28  
29

30  
31 **Funding:** This work was supported by the National Science Fund for Distinguished Young  
32 Scholars(81625002); National Natural Science Foundation of China(81470391, 81470389);  
33 Shanghai Outstanding Academic Leaders Program(18XD1402400); Shanghai Municipal  
34 Education Commission - Gaofeng Clinical Medicine Grant Support(20152209 and  
35 20172014); Shanghai Science and Technology Committee(15411963600); Shanghai  
36 ShenKang Hospital Development Center(16CR3020A and 16CR3034A).  
37  
38  
39  
40  
41  
42  
43  
44  
45  
46  
47  
48  
49  
50  
51  
52  
53  
54  
55  
56  
57  
58  
59  
60

## REFERENCES

1. Barsky AJ, Orav EJ, Bates DW. Somatization increases medical utilization and costs independent of psychiatric and medical comorbidity. *Archives of general psychiatry* 2005;62(8):903-10. doi: 10.1001/archpsyc.62.8.903 [published Online First: 2005/08/03]
2. American Psychiatric Association: Diagnostic and Statistical Manual of Mental Disorders, Fifth Edition (DSM-5). Arlington, VA: American Psychiatric Association Publishing 2013.
3. Barsky AJ. Assessing somatic symptoms in clinical practice. *JAMA Intern Med* 2014;174(3):407-8. doi: 10.1001/jamainternmed.2013.12177
4. Organization WH. The ICD-10 Classification of Mental and Behavioural Disorders: Clinical Description and Diagnostic Guidelines: WHO 1993.
5. de Waal MW, Arnold IA, Eekhof JA, et al. Somatoform disorders in general practice: prevalence, functional impairment and comorbidity with anxiety and depressive disorders. *British Journal of Psychiatry the Journal of Mental Science* 2004;184(12):470.
6. Fink P, Hansen MS, Oxhøj ML. The prevalence of somatoform disorders among internal medical inpatients. *Journal of Psychosomatic Research* 2004;56(4):413.
7. Fink P, Sorensen L, Engberg M, et al. Somatization in primary care. Prevalence, health care utilization, and general practitioner recognition. *Psychosomatics* 1999;40(4):330-8. doi: 10.1016/s0033-3182(99)71228-4 [published Online First: 1999/07/14]
8. Jr SG. The course of somatization and its effects on utilization of health care resources. *Psychosomatics* 1994;35(3):263.
9. Hahn SR, Kroenke K, Spitzer RL, et al. The difficult patient: prevalence, psychopathology, and functional impairment. *Journal of General Internal Medicine* 1996;11(1):1.
10. Kroenke K, Spitzer RL, Williams JB. The PHQ-9: validity of a brief depression severity measure. *Journal of General Internal Medicine* 2001;16(9):606.

- 1  
2  
3 11. Spitzer RL, Kroenke K, Williams JB, et al. A brief measure for assessing generalized  
4 anxiety disorder: the GAD-7. *Archives of Internal Medicine* 2006;166(10):1092-97.  
5  
6
- 7 12. Kroenke K, Spitzer RL, Williams JB. The PHQ-15: validity of a new measure for  
8 evaluating the severity of somatic symptoms. *Psychosomatic Medicine* 2002;64(2):258-66.  
9
- 10 13. Gierk B, Kohlmann S, Kroenke K, et al. The somatic symptom scale-8 (SSS-8): a brief  
11 measure of somatic symptom burden. *Jama Internal Medicine* 2014;174(3):399.  
12
- 13 14. Qi Z, Jialiang M, Chunbo L, et al. Developing of somatic self-rating scale and its  
14 reliability and validity. *Chinese Journal of Behavioral Medicine and Brain Science*  
15 2010;19(9):847-9.  
16
- 17 15. European Medicines Agency. Pre-authorisation Evaluation of Medicines for Human Use:  
18 Guideline on clinical evaluation of diagnostic agents.  
19 [http://www.ema.europa.eu/docs/en\\_GB/document\\_library/Scientific\\_guideline/2009/09/W  
21 C500003584.pdf](http://www.ema.europa.eu/docs/en_GB/document_library/Scientific_guideline/2009/09/W<br/>20 C500003584.pdf).  
22
- 23 16. Myers TA. Goodbye, Listwise Deletion: Presenting Hot Deck Imputation as an Easy and  
24 Effective Tool for Handling Missing Data. *Communication Methods & Measures*  
25 2011;5(4):297-310.  
26
- 27 17. Spitzer RL, Kroenke K, Williams JB. Validation and utility of a self-report version of  
28 PRIME-MD: the PHQ primary care study. Primary Care Evaluation of Mental Disorders.  
29 Patient Health Questionnaire. *Jama* 1999;282(18):1737-44.  
30  
31  
32  
33  
34  
35  
36  
37  
38  
39  
40  
41  
42  
43  
44  
45  
46  
47  
48  
49  
50  
51  
52  
53  
54  
55  
56  
57  
58  
59  
60

1  
2  
3 **Figure Legends**  
4

5 **Figure 1** The Somatic Symptom Scale-China (SSS-Ch).  
6

7  
8 **Figure 2** Study flow. SSS-Ch the Somatic Symptom Scale-China; PHQ-15 the Patient Health  
9  
10 Questionnaire-15; PHQ-9 the Patient Health Questionnaire-9; GAD-7 the Generalized  
11  
12 Anxiety Disorder Scale-7; SF-20 the 20-Item Short Form Health Survey; SSD Somatic  
13  
14 Symptom Disorder.  
15

16  
17  
18  
19  
20  
21  
22  
23  
24  
25  
26  
27  
28  
29  
30  
31  
32  
33  
34  
35  
36  
37  
38  
39  
40  
41  
42  
43  
44  
45  
46  
47  
48  
49  
50  
51  
52  
53  
54  
55  
56  
57  
58  
59  
60

For peer review only

**Figure 1****Somatic Symptoms Scale-China****1. Basic Information**

Name \_\_\_\_\_ Sex \_\_\_\_\_ Age \_\_\_\_\_ Date \_\_\_\_\_ Tel \_\_\_\_\_  
 Education \_\_\_\_\_ Occupation \_\_\_\_\_ Duration of symptoms \_\_\_\_\_

**2. Instructions:**

This questionnaire is an important part of providing you with the best health care possible. Your answers will help in understanding programs that you may have. It may play a key role of your course of treatment.

**Not at all (NAA):** not exist

**Moderate:** influent daily work to some extent

**Mild:** bearable, do not influent daily work

**Severe:** unbearable

|    | Symptoms                                                                                                                     | NAA | Mild | Moderate | Severe |
|----|------------------------------------------------------------------------------------------------------------------------------|-----|------|----------|--------|
| 1  | Do you feel dizzy, vertigo, have head heaviness, headache or faint?                                                          | 1   | 2    | 3        | 4      |
| 2  | Do you have difficult to fall asleep, easily dreamful or woke up by panic, nightmare, early-wake up, sleeplessness?          | 1   | 2    | 3        | 4      |
| 3  | Do you feel tired or low energy?                                                                                             | 1   | 2    | 3        | 4      |
| 4  | Do you have less interest and feel moody, or don't want to be bothered?                                                      | 1   | 2    | 3        | 4      |
| 5  | Do you have chest discomfort like palpitation, chest tightness, chest pain or shortness of breath?                           | 1   | 2    | 3        | 4      |
| 6  | Are you easily anxious, nervous, worried, afraid or panic, even feel like going to die?                                      | 1   | 2    | 3        | 4      |
| 7  | Do you feel worried, thinking too much or easily having negative idea?                                                       | 1   | 2    | 3        | 4      |
| 8  | Do you have poor concentration, attention or memory decreased?                                                               | 1   | 2    | 3        | 4      |
| 9  | Do you feel tummy bloated and painful, burping, poor appetite, constipation or frequent bowel open, nausea or bad breath?    | 1   | 2    | 3        | 4      |
| 10 | Do you have muscle pain at neck, shoulder, upper or lower back and legs?                                                     | 1   | 2    | 3        | 4      |
| 11 | Are you easily sad or crying?                                                                                                | 1   | 2    | 3        | 4      |
| 12 | Do you have numbness, stiffness, twitching, shivering or chills in the joints of hands /legs or other parts of body?         | 1   | 2    | 3        | 4      |
| 13 | Do you have vision blurry, eye dryness or eye vision decreased during a short period?                                        | 1   | 2    | 3        | 4      |
| 14 | Are you easily irritated and restless, sensitive to voice or easily terrified?                                               | 1   | 2    | 3        | 4      |
| 15 | Do you feel you have certain thoughts and behaviors out of control?                                                          | 1   | 2    | 3        | 4      |
| 16 | Do you have sensitive skin, macula rash, itching, skin redness, hot flashes or sweating easily?                              | 1   | 2    | 3        | 4      |
| 17 | Are you excessively worries about your own or family's health issues, and often having attention on health status?           | 1   | 2    | 3        | 4      |
| 18 | Do you feel breath difficultly, have chest tightness easily, often have big sigh, cough or have pain at rib cages or flanks? | 1   | 2    | 3        | 4      |
| 19 | Do you have throat discomfort or feel choking, get stuffy nose and ringing sound around ears?                                | 1   | 2    | 3        | 4      |
| 20 | Are you easily having pain when urinating, urinary frequency or urgency, discomfort at below side?                           | 1   | 2    | 3        | 4      |

**Total score =**

If you checked off any problems on this questionnaire so far, how difficult have these problems made it for you to do your work, take care of thing at home, or get along with other people?

Not at all     Somewhat difficult     Very difficult     Extremely difficult

The Somatic Symptom Scale-China (SSS-Ch).

215x279mm (300 x 300 DPI)

Figure 2

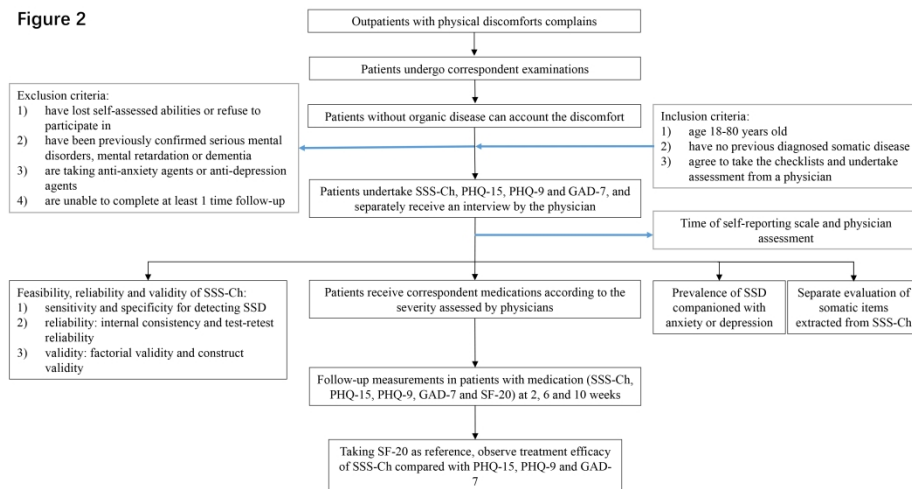

Study flow. SSS-Ch the Somatic Symptom Scale-China; PHQ-15 the Patient Health Questionnaire-15; PHQ-9 the Patient Health Questionnaire-9; GAD-7 the Generalized Anxiety Disorder Scale-7; SF-20 the 20-Item Short Form Health Survey; SSD Somatic Symptom Disorder.

338x178mm (300 x 300 DPI)

# BMJ Open

## Research Protocol for a Diagnostic Study: Identifying and Measuring the Severity of Somatic Symptom Disorder Using the Self-reported Somatic Symptom Scale-China (SSS-Ch)

|                                 |                                                                                                                                                                                                                                                                                                                                                                                                                                                                                                                                                                                                                                                                                                                                                                                |
|---------------------------------|--------------------------------------------------------------------------------------------------------------------------------------------------------------------------------------------------------------------------------------------------------------------------------------------------------------------------------------------------------------------------------------------------------------------------------------------------------------------------------------------------------------------------------------------------------------------------------------------------------------------------------------------------------------------------------------------------------------------------------------------------------------------------------|
| Journal:                        | <i>BMJ Open</i>                                                                                                                                                                                                                                                                                                                                                                                                                                                                                                                                                                                                                                                                                                                                                                |
| Manuscript ID                   | bmjopen-2018-024290.R1                                                                                                                                                                                                                                                                                                                                                                                                                                                                                                                                                                                                                                                                                                                                                         |
| Article Type:                   | Protocol                                                                                                                                                                                                                                                                                                                                                                                                                                                                                                                                                                                                                                                                                                                                                                       |
| Date Submitted by the Author:   | 22-Nov-2018                                                                                                                                                                                                                                                                                                                                                                                                                                                                                                                                                                                                                                                                                                                                                                    |
| Complete List of Authors:       | Mao, Jiliang; Renji Hospital, School of Medicine, Shanghai Jiaotong University, Department of Cardiology<br>Zhang, Weituo; Clinical Research Center, School of Medicine, Shanghai Jiaotong University<br>Su, Xuan; Renji Hospital, School of Medicine, Shanghai Jiaotong University, Department of Cardiology<br>Gao, Chuang; Clinical Research Center, School of Medicine, Shanghai Jiaotong University<br>Chen, Bingxu; School of Medicine, Shanghai Jiao Tong University<br>Feng, Zehao; Renji Hospital, School of Medicine, Shanghai Jiaotong University, Department of Cardiology<br>Jiang, Meng; Renji Hospital, School of Medicine, Shanghai Jiaotong University, Department of Cardiology<br>Pu, Jun; Renji Hospital, School of Medicine, Shanghai Jiaotong University |
| <b>Primary Subject Heading</b>: | Mental health                                                                                                                                                                                                                                                                                                                                                                                                                                                                                                                                                                                                                                                                                                                                                                  |
| Secondary Subject Heading:      | Research methods                                                                                                                                                                                                                                                                                                                                                                                                                                                                                                                                                                                                                                                                                                                                                               |
| Keywords:                       | Somatic Symptom Scale-China, somatic symptom disorder, mental disorders management                                                                                                                                                                                                                                                                                                                                                                                                                                                                                                                                                                                                                                                                                             |
|                                 |                                                                                                                                                                                                                                                                                                                                                                                                                                                                                                                                                                                                                                                                                                                                                                                |

SCHOLARONE™  
Manuscripts



1  
2  
3 1 **Research Protocol for a Diagnostic Study: Identifying and Measuring the Severity of**  
4  
5 2 **Somatic Symptom Disorder Using the Self-reported Somatic Symptom Scale-China**  
6  
7 **(SSS-Ch)**  
8  
9  
10 4

11  
12  
13  
14 5 Jialiang Mao<sup>a1</sup>, MD, PhD, Weituo Zhang<sup>a2</sup>, PhD, Xuan Su<sup>1</sup>, MD, Chuang Gao<sup>2</sup>, MPH,

15  
16 6 Bingxu Chen<sup>3</sup>, MD, Zehao Feng<sup>1</sup>, MD, Meng Jiang<sup>\*1</sup>, MD, PhD, Jun Pu<sup>\*1</sup>, MD, PhD

17  
18 7 <sup>1</sup> Department of Cardiology, Renji Hospital, School of Medicine, Shanghai Jiao Tong  
19  
20 8 University, Shanghai, China 200127

21  
22  
23 9 <sup>2</sup> Clinical Research Center, School of Medicine, Shanghai Jiao Tong University, Shanghai,  
24  
25 10 China 200025

26  
27  
28 11 <sup>3</sup> School of Medicine, Shanghai Jiao Tong University, Shanghai, China 200025  
29  
30 12

31  
32 13 <sup>a</sup> Co-first author: Jialiang Mao and Weituo Zhang contributed equally to the paper.

33  
34 14 \* Names and addresses for correspondence: Meng Jiang, MD, PhD, FSCMR; Jun Pu, MD,  
35  
36 15 PhD, FACC; Department of Cardiology, Renji Hospital, School of Medicine, Shanghai  
37  
38 16 Jiaotong University, Shanghai, China; 160 Pujian Road, Shanghai, China, 200127. Tel: 086-  
39  
40 17 21-68383447, Fax: 086-21-68383447; Email: [jiangmeng0919@163.com](mailto:jiangmeng0919@163.com);

41  
42 18 [pujun310@hotmail.com](mailto:pujun310@hotmail.com).  
43  
44  
45  
46 19

47  
48 20 **Word count:** 4925  
49  
50  
51  
52  
53  
54  
55  
56  
57  
58  
59  
60

---

<sup>1</sup> Meng Jiang and Jun Pu contributed equally to this paper.

## 1 **ABSTRACT**

2 **Aim** The recognition rate of somatic symptom disorder (SSD) in general hospitals is  
3 unsatisfactory. The current self-reported questionnaires do not sufficiently consider both  
4 physical and psychological symptoms and are not validated for monitoring treatment efficacy  
5 in patients with SSD. The Somatic Symptom Scale-China (SSS-Ch) questionnaire was  
6 developed due to the urgent clinical demand. The aim of this research is to validate the self-  
7 reported SSS-Ch as a timely and practical instrument to identify SSD and to assess the  
8 severity of this disorder.

9 **Methods and Analysis** At least 852 patients without organic disease but presenting with  
10 physical discomfort will be recruited at a general hospital. Each patient will undergo a DSM-  
11 5-guided physician diagnosis, including disease identification and severity assessment, as a  
12 reference standard. This research will utilize the SSS-Ch to evaluate its diagnostic  
13 performance in SSD compared to that of the Patient Health Questionnaire-15 (PHQ-15) and  
14 other SSD-related questionnaires. Statistical tests for the area under the curve (AUC) of the  
15 receiver operating curve (ROC) and Spearman's correlation will be used to compare the  
16 accuracy of the SSD identification and severity assessment respectively. In addition to this  
17 standard diagnostic study, we will conduct follow-up investigations to explore the  
18 characteristics of the SSS-Ch in monitoring treatment effects.

19  
20  
21 **Ethics and Dissemination** Ethical approval was provided by the Renji Hospital Human  
22 Research Ethics Committee, approval number 2015016. The findings of this study will be  
23 disseminated via peer-reviewed journals and presented at international conferences.

24 Trial registration number: NCT03513185

## 1 **Strengths and limitations of this study**

- 2 1. First, we introduce a tool to facilitate daily clinical work. The tool provides clinicians  
3 with an easy-to-use questionnaire that can be completed quickly and combines both  
4 somatic and psychological features to improve physicians' comfort level in screening  
5 suspected SSD patients and referring them to specific doctors.
- 6 2. Second, our previous study has shown the reliability and factorial validity of the SSS-  
7 Ch by utilizing an early version of the scale. The current study further modifies the  
8 SSS-Ch based on the DSM-5 and, for the first time, is applied to evaluate its clinical  
9 utility.
- 10 3. Third, patients will benefit by improving their awareness of the disease and their  
11 ability to self-monitor their symptoms.
- 12 4. A potential limitation of this study is that it represents the efficacy of the SSS-Ch only  
13 in patients without organic disease. Therefore, further application of the SSS-Ch in  
14 patients with specific diseases should be separately investigated.
- 15 5. Since only patients without a positive physical examination will be referred to the  
16 special clinic, a referral bias exists due to the nature of our clinic. Moreover, the  
17 epidemiology of health care facilities is different from that of general hospitals;  
18 therefore, the diagnostic accuracy in a health care sample needs additional  
19 investigation.
- 20 6. The potential of monitoring the treatment effect will be affected by loss to follow-up  
21 bias due to the unpredictable pattern of loss to follow-up.

## 23 **Keywords**

24 Somatic Symptom Scale-China; somatic symptom disorder; mental disorders management

## 1 INTRODUCTION

2 One of the common medical conditions observed in general hospitals is somatic symptom  
3 disorder (SSD) and related disorders<sup>1 2</sup>. SSD refers to symptoms that are often difficult to  
4 explain after adequate evaluation<sup>3</sup>; even when significant medical disease is present, the  
5 patients' symptoms may nonetheless be unrelated to their disease<sup>2</sup>. Diagnosis of SSD  
6 emphasizes the existence of positive symptoms and signs (one or multiple somatic symptoms  
7 plus abnormal thoughts, feelings, and behaviours in response to these symptoms)<sup>2</sup>. The  
8 disorder has an estimated current prevalence in the general population of 5-7%<sup>2</sup>. Individuals  
9 with somatic symptoms are commonly encountered in general hospitals and primary care as  
10 well as in psychiatric and other mental health settings<sup>2</sup>. The recognition rate of SSD is  
11 unsatisfactory due to the diagnostic complexity, and some physicians may not feel  
12 sufficiently trained to evaluate patients with suspected SSD; thus, SSD could be  
13 underdiagnosed in routine care. Therefore, patients may sustain somatic symptoms without  
14 appropriate treatment due to the lack of awareness of SSD. Patients with somatization had  
15 approximately twice as much outpatient and inpatient medical care utilization and annual  
16 medical care costs as patients without somatization. An estimated \$256 billion in annual  
17 medical care costs is attributable to the incremental effects of somatization alone<sup>1</sup>. Whereas  
18 depression and anxiety disorders are widely researched, SSD has been far less studied.  
19 Follow-up or treatment studies of this disorder are even scarcer. Hence, it is highly important  
20 that physicians be prepared to identify SSD, grade the symptom severity and treat it in a  
21 timely manner; failure to do so can result in high degrees of morbidity, lost productivity, and  
22 overutilization of medical resources<sup>4 5</sup>.

23 The fifth edition of the Diagnostic and Statistical Manual of Mental Disorders (DSM-5) is  
24 currently widely used for the diagnosis of SSD<sup>2</sup> (see Supplementary Figure 1 for detailed  
25 criteria) with the aim of identifying patients and assessing the severity of the disorder. The

1  
2  
3 1 DSM-5 criteria replace the DSM-IV criteria for somatization disorder, undifferentiated  
4  
5 2 somatoform disorder and pain disorder<sup>6</sup>, and they emphasize that it is important to evaluate  
6  
7 3 patients in terms of their psychology, behaviour and physical condition altogether and then  
8  
9  
10 4 treat the patients according to the severity of the disorder. They also incorporate illness  
11  
12 5 anxiety disorder. Differences in medical care across cultures affect the management of these  
13  
14 6 somatic symptoms. Individuals in China usually refuse to receive psychological counselling.  
15  
16  
17 7 Thus, in general medical hospitals, non-psychiatric physicians must face more patients with  
18  
19 8 psychological symptoms. The DSM-5, however, is difficult to follow clinically since it  
20  
21 9 depends on qualified and experienced physicians conducting an interview<sup>6</sup>. Moreover, the  
22  
23  
24 10 fact that anxiety and depressive disorder are often associated with SSD in medical settings (in  
25  
26 11 approximately 57.7% of SSD patients)<sup>1</sup> adds severity and complexity to the somatic  
27  
28 12 components, which makes clinicians feel less confident in dealing with such individuals. It is  
29  
30 13 more clinically practical to detect a disorder by self-administered questionnaires, where  
31  
32  
33 14 patients can score the symptoms related to their own condition and severity in a short time. A  
34  
35 15 series of studies has focused on this issue, using various self-reported questionnaires asking  
36  
37 16 about either physical or psychological symptoms to screen for SSD<sup>7-12</sup>. Laferton et al. used  
38  
39 17 the Patient Health Questionnaire 15-item somatic scale (PHQ-15), the Whiteley Index-7 and  
40  
41 18 the Scale for the Assessment of Illness Behavior questionnaires to identify SSD<sup>7</sup>. The  
42  
43 19 Somatic Symptom Scale-8 and Somatic Symptom Scale-12 have been used to assess the  
44  
45 20 validity and reliability of somatic symptoms and the psychological symptoms of SSD,  
46  
47 21 respectively<sup>8-11</sup>. Tu et al. have reported using the Whiteley Index-7 to screen for SSD<sup>12</sup>.

51  
52 22 Based on the published studies, we aim to develop a self-administered questionnaire to  
53  
54 23 provide a more comprehensive reflection of the true clinical picture than can be achieved by  
55  
56 24 assessing the somatic complaints alone. Our Somatic Symptom Scale-China (SSS-Ch)  
57  
58 25 integrates somatic symptoms with depression and anxiety items. It incorporates affective,  
59  
60

1 cognitive, and behavioural components. It is designed to be used in general medical facilities  
2 and to provide a tool for clinicians to quickly detect suspected somatic burden. It aims to  
3 establish a more accessible and time-saving way to assess the status of subjects.

4 The SSS-Ch questionnaire was developed based on the DSM-5. Additionally, it  
5 simultaneously evaluates depression and anxiety. It introduces illness anxiety disorder, which  
6 was previously not included in the DSM-IV. For the first time, an organ-based evaluation is  
7 used. The questionnaire is an abbreviated 20-item version that can be entirely self-  
8 administered by the patient. The SSS-Ch is designed to assess the presence and severity of  
9 the symptoms. Our previous study validated its reliability and validity<sup>13</sup>. Briefly, in that  
10 study, the SSS-Ch was composed of 4 dimensions: physical disorder, anxiety disorder,  
11 depression disorder, and anxiety and depression disorder. The test-retest reliability was 0.9.  
12 The correlation coefficient between each dimension and the total was between 0.76 and 0.88,  
13 and the correlation coefficient within dimensions was 0.56-0.70. Items in the scale assess  
14 somatic symptoms (50%, 10/20 items), anxiety (20%, 4/20 items), depression (20%, 4/20  
15 items), and anxiety and depression (10%, 2/20 items).

## 16 **Study objectives and research questions**

### 17 Primary objective

18 The primary objective of this study is to test two types of diagnostic accuracy with a DSM-5-  
19 guided physician diagnosis as the reference standard: (1) the accuracy of the SSS-Ch  
20 compared to the PHQ-15 for identifying SSD and (2) the accuracy of the SSS-Ch compared  
21 to the PHQ-15 for assessing severity.

### 22 Secondary objective

1  
2  
3  
4  
5  
6  
7  
8  
9  
10  
11  
12  
13  
14  
15  
16  
17  
18  
19  
20  
21  
22  
23  
24  
25  
26  
27  
28  
29  
30  
31  
32  
33  
34  
35  
36  
37  
38  
39  
40  
41  
42  
43  
44  
45  
46  
47  
48  
49  
50  
51  
52  
53  
54  
55  
56  
57  
58  
59  
60

1 The secondary objective is to explore the potential utility of the SSS-Ch in monitoring  
2 treatment effect. We intend to observe the trends in how the score of the SSS-Ch and other  
3 questionnaires after treatment changes over time.  
4

For peer review only

## 1 METHODS

### 2 Study overview

3 This study will use a prospective diagnostic design and will be conducted at a tertiary general  
4 hospital in Shanghai, China. The study protocol was approved by the ethics committees of  
5 Renji Hospital, and written informed consent will be obtained from all study participants. The  
6 clinical trial registration can be found at <https://register.clinicaltrials.gov/>, and the registration  
7 number is NCT03513185.

8 Particular attention will be paid to the appropriate storage of this study. Patient  
9 confidentiality will be maintained, and no identifying features of the patients will be  
10 published. The protocol development will adhere to the EMA guidelines for diagnosis study<sup>14</sup>.

### 11 Description of the SSS-Ch and Assessment of Severity

12 The SSS-Ch is a somatic symptom scale (**Figure 1**) derived from the DSM-5. It queries  
13 approximately 10 somatic clusters that account for 50% of the physical complaints (1 item  
14 per body system, items 1, 5, 9, 10, 12, 13, 16, and 18-20). Anxiety and depression items  
15 compose another 50% (anxiety, 20% (4/20), items 6, 14, 15, and 17; depression, 20% (4/20),  
16 items 3, 4, 7, and 11; and anxiety and depression, 10%, items 2 and 8). Subjects answer the  
17 following question: “Since you have felt unwell, how often have you been bothered in the  
18 previous 6 months by any of the following problems?” For scoring, the subjects rate the  
19 frequency of each symptom as 1 (“does not exist”), 2 (“the problem occurred occasionally for  
20 a couple of days per month and/or is endurable”), 3 (“the problem occurred almost half of the  
21 days per month and/or I hope it will ease up”) or 4 (“the problem occurred almost every day  
22 and/or is unendurable”). Thus, in determining the SSS-Ch score, each question has a score  
23 ranging from 1 to 4, corresponding to the frequency of the problem occurrence, and the total  
24 score ranges from 20 to 80. The severity categories are assessed according to the sum of the



1 scores. The SSS-Ch scores range from 20 to 29, 30 to 39, 40 to 59, and  $\geq 60$  and represent  
2 normal, mild, moderate, and severe SSD, respectively. The selection of these cut-off values  
3 takes into account the results of our previous study<sup>15</sup> (a cut-off score of 30 was obtained from  
4 the receiver operating curve (ROC), reaching a sensitivity of 0.97 and a specificity of 0.96)  
5 and clinical experience.

## 6 **Study Design**

7 The study is composed of 2 stages (Figure 2) corresponding to the primary and secondary  
8 research objectives. The first stage is a prospective diagnostic study to test the diagnostic  
9 performance of the SSS-Ch questionnaire. The second stage is an exploratory follow-up stage  
10 that uses the SSS-Ch questionnaire as a tool to monitor treatment effects.

11 Briefly, consecutive outpatients with physical discomfort presenting to internal medicine  
12 departments in a tertiary hospital in China will first undergo the corresponding examination.  
13 Patients with no organic disease that can account for their discomfort will be considered to  
14 have a probability of somatic disorder. Those patients will then be transferred to a specialist  
15 clinic for the treatment of suspected SSD. They will successively fill out the SSS-Ch  
16 questionnaire (and other self-reported instruments for the sake of validity estimation), and  
17 non-clinical research assistants will collect the questionnaires and determine the scores. A  
18 physician or a psychologist who is blind to the results of the SSS-Ch will separately interview  
19 the patient to diagnose SSD according to the corresponding DSM-5 criteria. Prescriptions  
20 will be given if the patient is diagnosed with SSD. Two-, 6-, and 10-week follow-ups will be  
21 scheduled to repeat the questionnaires for patients receiving medications. Since health-related  
22 quality of life is often impaired in patients with SSD, the 20-item Short Form Health  
23 Survey (SF-20) will be administered as an indicator of therapeutic effects during follow-up.

## 24 **Participants and Procedure**

1  
2  
3 1 Inclusion criteria  
4

5  
6 2 (1) Patients aged 18-80 years old; (2) patients who have no previous diagnosis of somatic  
7  
8 3 disease; (3) patients without systemic disease that can account for their physical discomfort;  
9  
10 4 and (4) patients enrolled as outpatients after they agree to complete the questionnaires and  
11  
12 5 undergo assessment by a physician will meet the inclusion criteria.  
13  
14

15 6 Exclusion criteria  
16

17  
18 7 (1) Patients who have lost their self-assessment ability or refuse to participate; (2) patients  
19  
20 8 who have been previously confirmed to have serious mental disorders, mental retardation or  
21  
22 9 dementia; (3) patients who are taking anti-anxiety agents or anti-depression agents; and (4)  
23  
24 10 patients who are deemed unable to complete face-to-face follow-up after at least 1 month  
25  
26 11 (such as those who live abroad) will be excluded from the study.  
27  
28  
29

30 12 Reference standard  
31

32  
33 13 As in Axelsson et al<sup>6</sup>, judgement by a physician is set as the reference standard to test  
34  
35 14 consistency. The physician team is composed of both general hospital “specified physicians”  
36  
37 15 (that is, physicians qualified as national psychological counsellors) and psychologists. The  
38  
39 16 status of the subject will be assessed by the physician or psychologist using the DSM-5 SSD  
40  
41 17 criteria (SSD, 300.82 (F45.1) and unspecified somatic symptom and related disorder, 300.82  
42  
43 18 (F45.9)) (Supplementary Figure 1), anxiety disorder criteria and depression disorder criteria.  
44  
45 19 When there is diagnostic uncertainty, the senior physician will be consulted with.  
46  
47  
48

49 20 Assessing capacity and obtaining informed consent  
50

51  
52 21 Informed consent will be sought by a trained researcher who will provide all necessary  
53  
54 22 information about this study to the potential participants. It will be made clear to participants  
55  
56 23 that they are under no obligation to take part, their usual care will not be affected by their  
57  
58 24 decision, and they can withdraw consent without giving a reason. Participants will be given a  
59  
60

1  
2  
3 1 sheet with contact details for the research team and instructions on what to do if they wish to  
4  
5 2 withdraw or require further information.  
6  
7

### 8 3 Blinding

9  
10 4 After a patient with suspected SSD is transferred to the specialist clinic, the patient will first  
11  
12 5 complete the questionnaires in a separate room, and the research assistant will help the  
13  
14 6 patient understand the questions. We will also ensure that the patients are comfortable. Then,  
15  
16 7 an initial consultation will be blindly conducted by a physician who has been qualified as a  
17  
18 8 national psychological counsellor. An independent diagnosis and severity category will be  
19  
20 9 assigned by the physician using the DSM-5 criteria. The duration of the self-reported scale  
21  
22 10 and the physician assessment will be separately recorded.  
23  
24  
25

### 26 11 Medication

27  
28 12 The patients will be informed of the results immediately after the physician consultation and  
29  
30 13 the questionnaire completion. The patients will communicate with the doctor throughout the  
31  
32 14 diagnosis and treatment. Since patients in China usually refuse to accept psychotherapy,  
33  
34 15 medications will be prescribed according to the physician's evaluation. Anti-anxiety  
35  
36 16 treatment or anti-depression treatment will be selectively administered according to the  
37  
38 17 severity of the somatic symptom burden. Generally, members of the thioxanthene class, such  
39  
40 18 as Deanxit, are used for mild symptoms; selective serotonin reuptake inhibitors (SSRIs) are  
41  
42 19 applied for moderate symptoms; and serotonin-norepinephrine reuptake inhibitors (SNRIs)  
43  
44 20 are applied for severe symptoms, with the serotonin antagonist and reuptake inhibitor (SARI)  
45  
46 21 class prescribed if sleeping problems exist.  
47  
48  
49  
50  
51  
52

### 53 22 Follow-up

54  
55  
56  
57  
58  
59  
60

1 A face-to-face interview will be scheduled at 2, 6, and 10 weeks to follow up using the SSS-  
2 Ch, PHQ-15, PHQ-9 and GAD-7 questionnaires for patients taking medication. An SF-20  
3 survey will be conducted to evaluate quality of life.

#### 4 **Outcome measures**

##### 5 Reliability and validity

6 Reliability will be measured by Cronbach's alpha. A randomized sample of approximately  
7 100 participants will be asked to complete the questionnaires 1 week after the initial  
8 completion to analyse the test-retest reliability.

9 The criterion validity will be calculated by the correlations of the diagnostic results and the  
10 severity assessments of somatic symptoms between the SSS-Ch and the reference standard.

11 The SSS-Ch consists of 10 questions for somatic symptoms, 4 for depression, 4 for  
12 anxiety, and 2 for depression and anxiety. The construct validity will be tested by  
13 confirmatory factor analysis, comparing the corresponding factors with the PHQ-15, Patient  
14 Health Questionnaire-9 (PHQ-9) and Generalized Anxiety Disorder Scale-7 (GAD-7).

##### 15 Diagnostic performance

16 The diagnostic accuracy of a questionnaire for SSD identification is measured by the area  
17 under the curve (AUC) of an ROC, the sensitivity/specificity under a prespecified cut-off  
18 value, and the positive/negative predictive values in the study population, referring to the  
19 physician diagnosis as the reference standard. The accuracy of the severity assessment of a  
20 questionnaire is measured by the Spearman correlation between the questionnaire score and  
21 the physician's severity assessment.

##### 22 Other Clinical utilities

23 Convenience in clinical practice is measured by the average time taken to complete each  
24 questionnaire or receive a diagnosis from a physician.

1  
2  
3 1 Clinical utility in monitoring treatment efficacy in patients is measured by correlation with  
4  
5 2 the SF-20 during follow-up visits.  
6  
7

### 8 3 **Sample size calculation**

9

10 4 The sample size calculation considers the comparison of diagnostic accuracy for both SSD  
11  
12 5 identification and severity assessment, whichever is larger. In the pilot study, the prevalence  
13  
14 6 of SSD was 76.9% in the study population who were referred to the special clinics, the AUC  
15  
16 7 of the ROC for PHQ-15 was 0.88, and Spearman's correlation of the PHQ-15 score with the  
17  
18 8 physician's diagnosis was 0.77 (95% CI: 0.43, 0.92). The correlation of the SSS-Ch and  
19  
20 9 PHQ-15 scores was set to 0.6. With a non-inferiority margin of 0.05,  $\alpha=0.025$ , and  $\beta=0.8$ , the  
21  
22 10 sample size for SSD diagnosis was 852. With a non-inferiority margin of 0.1,  $\alpha=0.025$ , and  
23  
24 11  $\beta=0.8$ , the sample size for severity assessment was 579. Therefore, as the overall sample size  
25  
26 12 of this study was  $N=852$  with SSD-positive  $N+=655$  and SSD-negative  $N-=197$ , both the  
27  
28 13 positive and negative sample size requirements were met.  
29  
30  
31  
32

### 33 14 **Statistical analysis**

34

35 15 We will report our results according to STARD. We will compute the median (P25, P75)  
36  
37 16 scores for each questionnaire and the number and percentage of patients (%) in each  
38  
39 17 diagnostic category as descriptive statistics.  
40  
41  
42

43 18 Reliability will be measured using Cronbach's  $\alpha$ . The criterion validity will be measured  
44  
45 19 by the kappa coefficient of diagnosis and the Kendall tau-b of severity assessment. Construct  
46  
47 20 validity will be tested using confirmatory factor analyses.  
48  
49  
50

51 21 The primary analysis of the diagnostic performance will consist of two comparisons using  
52  
53 22 Bonferroni correction: (1) the non-inferior comparison of the SSS-Ch with the PHQ-15 in  
54  
55 23 SSD diagnostic accuracy as measured by the AUC of the ROC with  $\Delta=0.05$ ,  $\alpha=0.025$  in the  
56  
57 24 whole study population using Delong's method<sup>16</sup> and (2) the non-inferior comparison of the  
58  
59  
60

1  
2  
3 1 SSS-Ch with the PHQ-15 in SSD severity assessment measured by Spearman's correlation  
4  
5 2 with  $\Delta=0.1$ ,  $\alpha=0.025$  in the population with a confirmed SSD diagnosis using Fisher's Z test.  
6  
7  
8 3 Both comparisons refer to the physician's diagnosis as the reference standard. If either non-  
9  
10 4 inferiority criterion is met, the corresponding superiority will be tested.  
11  
12

13 5 As a secondary analysis, the sensitivity, specificity, and positive and negative predictive  
14  
15 6 values will also be reported. Prespecified cut-off values will be validated. In addition, we will  
16  
17 7 compare the time needed to complete each questionnaire and be diagnosed by a physician.  
18  
19

20 8 In the follow-up data, questionnaire scores by time will be demonstrated in a line chart with  
21  
22 9 error bars.  
23  
24

25 10 Missing values will be imputed with multiple imputation<sup>17</sup>. Subgroup analysis according to  
26  
27 11 gender and age will also be conducted. All statistical analyses will be performed with R  
28  
29 12 (version 3.5.1)  
30  
31

### 32 13 **Patient and public involvement statement**

33  
34  
35 14 Patients were involved at the design stage of the trial, including clarifying the  
36  
37 15 understandability of the SSS-Ch questionnaire and discussing the length of the consultation  
38  
39 16 time, the manner of notification of the disease condition, the follow-up method, and the  
40  
41 17 dissemination of the results. Before the formal recruitment started, we received feedback  
42  
43 18 from patients who had SSD during a pretest of the case report form (CRF) and used it to  
44  
45 19 improve the final design of the CRF. We carefully assessed the burden of the trial  
46  
47 20 interventions on patients. We intend to disseminate the main results to the trial participants  
48  
49 21 via email. The study outcomes will be disseminated in conference reports and academic  
50  
51 22 publications.  
52  
53  
54

### 55 23 **Current status**

56  
57  
58  
59  
60

1  
2  
3  
4  
5  
6  
7  
8  
9  
10  
11  
12  
13  
14  
15  
16  
17  
18  
19  
20  
21  
22  
23  
24  
25  
26  
27  
28  
29  
30  
31  
32  
33  
34  
35  
36  
37  
38  
39  
40  
41  
42  
43  
44  
45  
46  
47  
48  
49  
50  
51  
52  
53  
54  
55  
56  
57  
58  
59  
60

1 The first study participant was enrolled in November 2017. In November 2018, patient  
2 recruitment was not completed.  
3  
4

For peer review only

## 1 DISCUSSION

2 In this study protocol, we describe a diagnostic study design that evaluates the efficacy of a  
3 newly developed somatic symptom scale adapted to China for patients with suspected  
4 somatic diseases that might be applied as a first-line instrument for screening and monitoring  
5 treatment efficacy in individual outpatient consultations. We expect that a physician will  
6 benefit from the SSS-Ch on a clinically significant level through improved self-confidence  
7 and timeliness and that the participants will benefit through improving their awareness of the  
8 disease and ability to self-monitor their symptoms. Moreover, we will examine the  
9 characteristics of the SSS-Ch compared with other somatic symptom questionnaires.

10 Our SSS-Ch is designed as a “one-stop shop” tool that combines somatic items with  
11 mental disorder items. This design is consistent with the suggestion in the DSM-5 that  
12 somatic symptoms are likely accompanied by depression and anxiety<sup>1</sup>. Somatic symptoms  
13 may interact with mental items, and mental symptoms may be triggered differently than  
14 conventional mental diseases in this group. Clinically, it is not easy to clearly separate body  
15 from mental status, and the significance of each item is unknown. We caution that 50% of  
16 mental items have the possibility of increasing the incidence of SSD, and a subgroup score  
17 with somatic symptom items alone is used for this appraisal.

18 The study has several strengths. First, we will introduce a tool to facilitate daily clinical  
19 work. The tool provides clinicians with an easy-to-use questionnaire that can be completed  
20 quickly to improve physicians’ comfort level in screening suspected SSD patients and to refer  
21 them to specific doctors. Second, our previous study has shown the reliability and factorial  
22 validity of the SSS-Ch by utilizing an early version of it<sup>13</sup>. The current study further modifies  
23 the SSS-Ch based on the DSM-5 and, for the first time, evaluates its clinical utility. Third,  
24 patients will benefit by improving their awareness of the disease and their ability to self-  
25 monitor their symptoms.



1  
2  
3 1 This trial has some limitations. First, SSD can be accompanied by diagnosed medical  
4  
5 2 disorders. The current study, however, represents the efficacy of the SSS-Ch only in patients  
6  
7 3 without organic diseases. Therefore, the further application of the SSS-Ch to patients with  
8  
9 4 specific diseases should be separately investigated. Moreover, the epidemiology of health  
10  
11 5 care facilities is different from that of general hospitals; therefore, the diagnostic accuracy in  
12  
13 6 a health care sample needs additional investigation. Second, there is no gold standard for SSD  
14  
15 7 diagnosis. Similar to Axelsson et al., our study uses an appraisal by an “experienced”  
16  
17 8 physician team as the reference standard. In this way, we measure only the consistency  
18  
19 9 between the physician assessment and questionnaire score. Third, the study was designed as a  
20  
21 10 mid-term investigation with four measurement time points, and thus missing data must be  
22  
23 11 considered. Referring to the fact that only 16% of patients in the primary care evaluation of  
24  
25 12 mental disorders (PRIME-MD) study were involved in the follow-up<sup>18</sup>, we estimate that a  
26  
27 13 high rate of missing data will also occur in our patients. Fortunately, each subject in our study  
28  
29 14 will undergo the same set of questionnaires for the entire scale, and thus the missing samples  
30  
31 15 lost to follow-up will not differ among the groups; therefore, they will not produce significant  
32  
33 16 bias and will not affect our assessment.

34  
35  
36  
37  
38  
39  
40 17 This study will help to clarify whether the developed SSS-Ch score is an effective tool for  
41  
42 18 rapid screening and assessment of severity in patients with suspected SSD in a general  
43  
44 19 hospital clinic and for convenient follow-up. If the SSS-Ch is found to be effective, it can be  
45  
46 20 implemented as a first-line screening and follow-up option. Additionally, we expect that the  
47  
48 21 SSS-Ch could provide personalized information to consulting physicians in a timely manner.  
49  
50 22 The study results will contribute to better outpatient care for patients with SSD.  
51  
52  
53  
54  
55  
56  
57  
58  
59  
60

1  
2  
3 **Acknowledgements:** We thank all the patients who participated and advised us throughout  
4  
5 the study design and implementation for their contributions.  
6

7  
8 **Conflict of interests:** The authors declare that they have no competing interests.  
9

10 **Ethical approval:** Ethical approval was provided by the Renji Hospital Human Research  
11  
12 Ethics Committee, approval number 2015016.  
13

14  
15 **Consent for publication:** All participants to date have provided written informed consent.  
16

17 **Authors' contributions:** JLM: substantial contributions to the conception, design and  
18  
19 interpretation of data, drafting and critical revisions for important intellectual content. WTZ:  
20  
21 analysis, statistics and interpretation of data, drafting the manuscript. XS: design and  
22  
23 implementation of study, acquisition of data, analysis and interpretation of data, drafting the  
24  
25 manuscript. CG: analysis, statistics and interpretation of data. BXC: acquisition of data,  
26  
27 analysis and interpretation of data, drafting the manuscript. ZHF: acquisition of data, analysis  
28  
29 and interpretation of data, drafting the manuscript. MJ: substantial contributions to the  
30  
31 conception, design and interpretation of data, critical revisions for important intellectual  
32  
33 content. JP: substantial contributions to the conception, design and interpretation of data.  
34  
35  
36

37 **Funding:** This work was supported by the National Science Fund for Distinguished Young  
38  
39 Scholars (81625002) for patient enrolment; National Natural Science Foundation of China  
40  
41 (81470391, 81470389) for physician consultation; Shanghai Outstanding Academic Leaders  
42  
43 Programme (18XD1402400) for data analysis; Shanghai Municipal Education Commission –  
44  
45 Gaofeng Clinical Medicine Grant Support (20152209 and 20172014) for follow-up  
46  
47 consultation; Shanghai Science and Technology Committee (15411963600) for seminars; and  
48  
49 Shanghai ShenKang Hospital Development Centre (16CR3020A and 16CR3034A) for data  
50  
51 collection.  
52  
53  
54

55  
56 **Registration name:** The validation and utility of the somatic symptom scale China (SSS-Ch)  
57  
58 for assessing somatic symptom disorder in general hospital outpatients.  
59  
60

**REFERENCES**

1. Barsky AJ, Orav EJ, Bates DW. Somatization increases medical utilization and costs independent of psychiatric and medical comorbidity. *Archives of general psychiatry* 2005;62(8):903-10. doi: 10.1001/archpsyc.62.8.903
2. American Psychiatric Association: Diagnostic and Statistical Manual of Mental Disorders, Fifth Edition (DSM-5). Arlington, VA: American Psychiatric Association Publishing 2013.
3. Barsky AJ. Assessing somatic symptoms in clinical practice. *JAMA Intern Med* 2014;174(3):407-8. doi: 10.1001/jamainternmed.2013.12177
4. Jr SG. The course of somatization and its effects on utilization of health care resources. *Psychosomatics* 1994;35(3):263.
5. Hahn SR, Kroenke K, Spitzer RL, et al. The difficult patient: prevalence, psychopathology, and functional impairment. *Journal of General Internal Medicine* 1996;11(1):1.
6. Axelsson E, Andersson E, Ljotsson B, et al. The health preoccupation diagnostic interview: inter-rater reliability of a structured interview for diagnostic assessment of DSM-5 somatic symptom disorder and illness anxiety disorder. *Cogn Behav Ther* 2016;45(4):259-69. doi: 10.1080/16506073.2016.1161663
7. Laferton JAC, Stenzel NM, Rief W, et al. Screening for DSM-5 Somatic Symptom Disorder: Diagnostic Accuracy of Self-Report Measures Within a Population Sample. *Psychosom Med* 2017;79(9):974-81. doi: 10.1097/PSY.0000000000000530
8. Gierk B, Kohlmann S, Kroenke K, et al. The somatic symptom scale-8 (SSS-8): a brief measure of somatic symptom burden. *JAMA Intern Med* 2014;174(3):399-407. doi: 10.1001/jamainternmed.2013.12179
9. Gierk B, Kohlmann S, Toussaint A, et al. Assessing somatic symptom burden: a psychometric comparison of the patient health questionnaire-15 (PHQ-15) and the

- 1  
2  
3 somatic symptom scale-8 (SSS-8). *J Psychosom Res* 2015;78(4):352-5. doi:  
4  
5 10.1016/j.jpsychores.2014.11.006  
6  
7  
8 10. Toussaint A, Murray AM, Voigt K, et al. Development and Validation of the Somatic  
9  
10 Symptom Disorder-B Criteria Scale (SSD-12). *Psychosom Med* 2016;78(1):5-12. doi:  
11  
12 10.1097/PSY.0000000000000240  
13  
14  
15 11. Toussaint A, Lowe B, Brahler E, et al. The Somatic Symptom Disorder - B Criteria Scale  
16  
17 (SSD-12): Factorial structure, validity and population-based norms. *J Psychosom Res*  
18  
19 2017;97:9-17. doi: 10.1016/j.jpsychores.2017.03.017  
20  
21  
22 12. Tu CY, Liao SC, Liu CY, et al. Application of the Chinese Version of the Whiteley  
23  
24 Index-7 for Detecting DSM-5 Somatic Symptom and Related Disorders.  
25  
26 *Psychosomatics* 2016;57(3):283-91. doi: 10.1016/j.psym.2015.12.010  
27  
28  
29 13. Qi Z, Jialiang M, Chunbo L, et al. Developing of somatic self-rating scale and its  
30  
31 reliability and validity. *Chinese Journal of Behavioral Medicine and Brain Science*  
32  
33 2010;19(9):847-9.  
34  
35  
36 14. European Medicines Agency. Pre-authorisation Evaluation of Medicines for Human Use:  
37  
38 Guideline on clinical evaluation of diagnostic agents.  
39  
40 [http://www.ema.europa.eu/docs/en\\_GB/document\\_library/Scientific\\_guideline/2009/](http://www.ema.europa.eu/docs/en_GB/document_library/Scientific_guideline/2009/09/WC500003584.pdf)  
41  
42 [09/WC500003584.pdf](http://www.ema.europa.eu/docs/en_GB/document_library/Scientific_guideline/2009/09/WC500003584.pdf).  
43  
44  
45 15. Organization WH. The ICD-10 Classification of Mental and Behavioural Disorders:  
46  
47 Clinical Description and Diagnostic Guidelines: WHO 1993.  
48  
49  
50 16. DeLong ER, DeLong DM, Clarke-Pearson DL. Comparing the areas under two or more  
51  
52 correlated receiver operating characteristic curves: a nonparametric approach.  
53  
54 *Biometrics* 1988;44(3):837-45.  
55  
56  
57 17. Buuren S, Groothuis-Oudshoorn K. mice: Multivariate imputation by chained equations  
58  
59 in R. *Journal of statistical software*, 2010; 1-68.  
60

1  
2  
3 18. Spitzer RL, Kroenke K, Williams JB. Validation and utility of a self-report version of  
4  
5 PRIME-MD: the PHQ primary care study. Primary Care Evaluation of Mental  
6  
7 Disorders. Patient Health Questionnaire. *Jama* 1999;282(18):1737-44.  
8  
9  
10  
11  
12  
13  
14  
15  
16  
17  
18  
19  
20  
21  
22  
23  
24  
25  
26  
27  
28  
29  
30  
31  
32  
33  
34  
35  
36  
37  
38  
39  
40  
41  
42  
43  
44  
45  
46  
47  
48  
49  
50  
51  
52  
53  
54  
55  
56  
57  
58  
59  
60

For peer review only

## Figure Legends

**Figure 1** The Somatic Symptom Scale-China (SSS-Ch).

**Figure 2** Study flow. SSS-Ch, Somatic Symptom Scale-China; PHQ-15: Patient Health Questionnaire-15; PHQ-9: Patient Health Questionnaire-9; GAD-7: Generalized Anxiety Disorder Scale-7; SF-20: 20-Item Short Form Health Survey; SSD: Somatic Symptom Disorder.

**Supplementary Figure 1** Criteria of somatic symptom disorder, unspecified somatic symptoms and related disorders from the DSM-5 (adapted from American Psychiatric Association: Diagnostic and Statistical Manual of Mental Disorders, Fifth Edition (DSM-5)).

### Self-rating Somatic Symptoms Scale

#### 1. Basic information

Name \_\_\_\_\_ Mobile phone \_\_\_\_\_ Gender \_\_\_ Age \_\_\_ Education level \_\_\_\_\_ Occupation \_\_\_\_\_  
 Date \_\_\_ Course of symptoms \_\_\_ Number of Self-rating \_\_\_ Historical diagnosis \_\_\_\_\_  
 Medications administered \_\_\_\_\_

#### 2. Instruction:

To better understand the degree to which you're bothered by the problems, please read carefully the following 20 items and CIRCLE the corresponding points at the right column that best describe your health. You MUST circle all the items listed in this questionnaire.

1: not existent

2: the problem occurred occasionally for a couple of days per-month and/or is endurable

3: the problem occurred almost half days per-month and/or hoping to ease up

4: the problem occurred almost every day and/or unendurable

In the past 6 month, do you have the following symptoms:

|     |                                                                                                                                                  |   |   |   |   |
|-----|--------------------------------------------------------------------------------------------------------------------------------------------------|---|---|---|---|
| 1)  | Dizziness, swelling in the head, heavy head, headache, spinning head, faint, buzzing in head                                                     | 1 | 2 | 3 | 4 |
| 2)  | Trouble sleeping (difficulty falling asleep/staying asleep, waking up too early, oversleeping, easily dream, nightmare, awakened for no reason ) | 1 | 2 | 3 | 4 |
| 3)  | Feeling tired or having low energy                                                                                                               | 1 | 2 | 3 | 4 |
| 4)  | Losing interest, moody, don't want to be bothered, lacking patience                                                                              | 1 | 2 | 3 | 4 |
| 5)  | Chest pain, shortness of breath, racing/pounding/fluttering heart, chest tightness                                                               | 1 | 2 | 3 | 4 |
| 6)  | Easily anxious, nervous, feeling scared, panicky, feeling I'm going to die, out of control                                                       | 1 | 2 | 3 | 4 |
| 7)  | Worried, apprehensive, negative ideation                                                                                                         | 1 | 2 | 3 | 4 |
| 8)  | Reduced attention & thinking abilities, forgetful, absentminded                                                                                  | 1 | 2 | 3 | 4 |
| 9)  | Bloating, stomach pain, gas, loss of appetite, constipation, loose bowels, nausea, becoming thin, dry or bitter mouth                            | 1 | 2 | 3 | 4 |
| 10) | Pain in the neck, back, shoulders, waist, arm, legs                                                                                              | 1 | 2 | 3 | 4 |
| 11) | Sensitive, easily sad and crying                                                                                                                 | 1 | 2 | 3 | 4 |
| 12) | Unusual sensations in the joints of hands or legs (numb, rigid, twitching, shivering, pricking, chilly)                                          | 1 | 2 | 3 | 4 |
| 13) | Blurry vision, eye dryness, eye pain or swelling, decreased eye vision over a short period of time                                               | 1 | 2 | 3 | 4 |
| 14) | Easily agitated or irritable, sensitive to voice, susceptible to startle                                                                         | 1 | 2 | 3 | 4 |
| 15) | Obsessive-compulsive thoughts or behaviors                                                                                                       | 1 | 2 | 3 | 4 |
| 16) | Skin allergies, itching, rash, skin flushing, hot flash, sweating                                                                                | 1 | 2 | 3 | 4 |
| 17) | Excess concerns about health issues, excessive worry that you or family members are ill                                                          | 1 | 2 | 3 | 4 |
| 18) | Difficulty breathing, feeling oppressed or suffocated, frequent long sigh, coughing, intercostal pain                                            | 1 | 2 | 3 | 4 |
| 19) | Choking feeling in the throat, nasal dryness and obstruction, ringing in the ears or ear blockage                                                | 1 | 2 | 3 | 4 |
| 20) | Frequent urination, urgent need to urinate, painful urination, or discomfort in perineum                                                         | 1 | 2 | 3 | 4 |

**Functional impairment in work, study, family life, and interpersonal relationship:** Not at all, A little bit, Quite a bit, or Very much/Severe

Figure 2

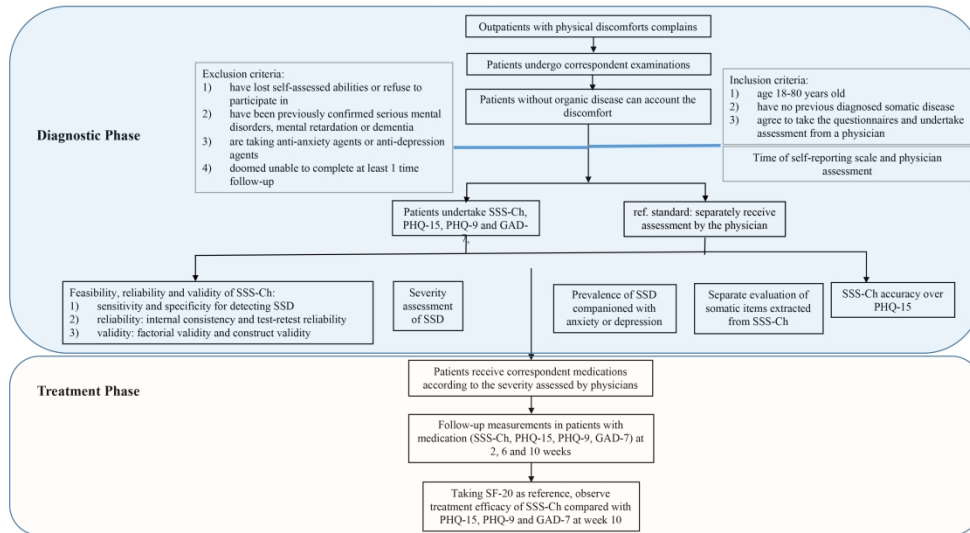

345x199mm (300 x 300 DPI)



## Somatic Symptom Disorder

---

Diagnostic Criteria **300.82 (F45.1)**

---

- A. One or more somatic symptoms that are distressing or result in significant disruption of daily life.
- B. Excessive thoughts, feelings, or behaviors related to the somatic symptoms or associated health concerns as manifested by at least one of the following:
1. Disproportionate and persistent thoughts about the seriousness of one's symptoms.
  2. Persistently high level of anxiety about health or symptoms.
  3. Excessive time and energy devoted to these symptoms or health concerns.
- C. Although any one somatic symptom may not be continuously present, the state of being symptomatic is persistent (typically more than 6 months).

*Specify if:*

**With predominant pain** (previously pain disorder): This specifier is for individuals whose somatic symptoms predominantly involve pain.

*Specify if:*

**Persistent:** A persistent course is characterized by severe symptoms, marked impairment, and long duration (more than 6 months).

*Specify current severity:*

**Mild:** Only one of the symptoms specified in Criterion B is fulfilled.

**Moderate:** Two or more of the symptoms specified in Criterion B are fulfilled.

**Severe:** Two or more of the symptoms specified in Criterion B are fulfilled, plus there are multiple somatic complaints (or one very severe somatic symptom).

---

## Unspecified Somatic Symptom and Related Disorder

---

**300.82 (F45.9)**

---

This category applies to presentations in which symptoms characteristic of a somatic symptom and related disorder that cause clinically significant distress or impairment in social, occupational, or other important areas of functioning predominate but do not meet the full criteria for any of the disorders in the somatic symptom and related disorders diagnostic class. The unspecified somatic symptom and related disorder category should not be used unless there are decidedly unusual situations where there is insufficient information to make a more specific diagnosis.

---

168x262mm (300 x 300 DPI)

|                                                                 |            |                                                                                                                                                        |
|-----------------------------------------------------------------|------------|--------------------------------------------------------------------------------------------------------------------------------------------------------|
| <b>TITLE OR</b>                                                 |            |                                                                                                                                                        |
| Page 1, line 1-2                                                | <b>1</b>   | Identification as a study of diagnostic accuracy using at least one measure of accuracy (such as sensitivity, specificity, predictive values, or AUC)  |
| <b>ABSTRACT</b>                                                 |            |                                                                                                                                                        |
| Page 2, line 2-18 for protocol article                          | <b>2</b>   | Structured summary of study design, methods, results, and conclusions (for specific guidance, see STARD for Abstracts)                                 |
| <b>INTRODUCTION</b>                                             |            |                                                                                                                                                        |
| Page 4-5, line 2-21                                             | <b>3</b>   | Scientific and clinical background, including the intended use and clinical role of the index test                                                     |
| Page 5, line 22-page 6, line 3; Page 6, line 17-page 7, line 3  | <b>4</b>   | Study objectives and hypotheses                                                                                                                        |
| <b>METHODS</b>                                                  |            |                                                                                                                                                        |
| <i>Study design</i><br>Page 8, line 3; Page 14, line 13-22      | <b>5</b>   | Whether data collection was planned before the index test and reference standard were performed (prospective study) or after (retrospective study)     |
| <i>Participants</i><br>Page 10, line 1-11                       | <b>6</b>   | Eligibility criteria                                                                                                                                   |
| Page 9, line 12-16                                              | <b>7</b>   | On what basis potentially eligible participants were identified (such as symptoms, results from previous tests, inclusion in registry)                 |
| Page 9, line 12-21                                              | <b>8</b>   | Where and when potentially eligible participants were identified (setting, location and dates)                                                         |
| Page 9, line 12                                                 | <b>9</b>   | Whether participants formed a consecutive, random or convenience series                                                                                |
| <i>Test methods</i><br>Page 8, line 12-page 9, line 6; Figure 1 | <b>10a</b> | Index test, in sufficient detail to allow replication                                                                                                  |
| Page 10, line 12-19; Suppl Fig 1                                | <b>10b</b> | Reference standard, in sufficient detail to allow replication                                                                                          |
| Page 4, line 23-page 5, line 5                                  | <b>11</b>  | Rationale for choosing the reference standard (if alternatives exist)                                                                                  |
| Page 8, line 19-page 9, line 6                                  | <b>12a</b> | Definition of and rationale for test positivity cut-offs or result categories of the index test, distinguishing                                        |
| Suppl Fig 1                                                     | <b>12b</b> | Definition of and rationale for test positivity cut-offs or result categories of the reference standard, distinguishing pre-specified from exploratory |
| Page 9, line 18-21                                              | <b>13a</b> | Whether clinical information and reference standard results were available                                                                             |
| Page 9, line 16-18; Page 12, line 1-3                           | <b>13b</b> | Whether clinical information and index test results were available to the assessors of the reference standard                                          |
| <i>Analysis</i><br>Page 12, line 15-21                          | <b>14</b>  | Methods for estimating or comparing measures of diagnostic accuracy                                                                                    |
| Page 10, line 19                                                | <b>15</b>  | How indeterminate index test or reference standard results were handled                                                                                |
| Page 14, line 10-12                                             | <b>16</b>  | How missing data on the index test and reference standard were handled                                                                                 |
| Page 12, line 15-21                                             | <b>17</b>  | Any analyses of variability in diagnostic accuracy, distinguishing pre-specified from exploratory                                                      |
| Page 13, line 3-13                                              | <b>18</b>  | Intended sample size and how it was determined                                                                                                         |
| <b>RESULTS</b>                                                  |            |                                                                                                                                                        |
| <i>Participants</i>                                             | <b>19</b>  | Flow of participants, using a diagram                                                                                                                  |
| NA                                                              | <b>20</b>  | Baseline demographic and clinical characteristics of participants                                                                                      |
| NA                                                              | <b>21a</b> | Distribution of severity of disease in those with the target condition                                                                                 |
| NA                                                              | <b>21b</b> | Distribution of alternative diagnoses in those without the target condition                                                                            |
| NA                                                              | <b>22</b>  | Time interval and any clinical interventions between index test and reference standard                                                                 |
| <i>Test results</i>                                             | <b>23</b>  | Cross tabulation of the index test results (or their distribution) by the results of the reference standard                                            |

|    |                                                 |           |                                                                                                       |
|----|-------------------------------------------------|-----------|-------------------------------------------------------------------------------------------------------|
| 1  |                                                 |           |                                                                                                       |
| 2  |                                                 |           |                                                                                                       |
| 3  | NA                                              | <b>24</b> | Estimates of diagnostic accuracy and their precision (such as 95% confidence intervals)               |
| 4  |                                                 |           |                                                                                                       |
| 5  |                                                 |           |                                                                                                       |
| 6  | NA                                              | <b>25</b> | Any adverse events from performing the index test or the reference standard                           |
| 7  |                                                 |           |                                                                                                       |
| 8  | <b>DISCUSSION</b>                               |           |                                                                                                       |
| 9  | Page 17,line 1-16                               | <b>26</b> | Study limitations, including sources of potential bias, statistical uncertainty, and generalisability |
| 10 |                                                 |           |                                                                                                       |
| 11 | Page 16,line 2-9;line 18-25; Page 17,line 17-22 | <b>27</b> | Implications for practice, including the intended use and clinical role of the index test             |
| 12 |                                                 |           |                                                                                                       |
| 13 | <b>OTHER</b>                                    |           |                                                                                                       |
| 14 | Page 2,line 24;Page 18,line 23-24;              | <b>28</b> | Registration number and name of registry                                                              |
| 15 |                                                 |           |                                                                                                       |
| 16 | NA                                              | <b>29</b> | Where the full study protocol can be accessed                                                         |
| 17 | Page 18,line 15-22                              | <b>30</b> | Sources of funding and other support; role of funders                                                 |
| 18 |                                                 |           |                                                                                                       |
| 19 |                                                 |           |                                                                                                       |
| 20 |                                                 |           |                                                                                                       |
| 21 |                                                 |           |                                                                                                       |
| 22 |                                                 |           |                                                                                                       |
| 23 |                                                 |           |                                                                                                       |
| 24 |                                                 |           |                                                                                                       |
| 25 |                                                 |           |                                                                                                       |
| 26 |                                                 |           |                                                                                                       |
| 27 |                                                 |           |                                                                                                       |
| 28 |                                                 |           |                                                                                                       |
| 29 |                                                 |           |                                                                                                       |
| 30 |                                                 |           |                                                                                                       |
| 31 |                                                 |           |                                                                                                       |
| 32 |                                                 |           |                                                                                                       |
| 33 |                                                 |           |                                                                                                       |
| 34 |                                                 |           |                                                                                                       |
| 35 |                                                 |           |                                                                                                       |
| 36 |                                                 |           |                                                                                                       |
| 37 |                                                 |           |                                                                                                       |
| 38 |                                                 |           |                                                                                                       |
| 39 |                                                 |           |                                                                                                       |
| 40 |                                                 |           |                                                                                                       |
| 41 |                                                 |           |                                                                                                       |
| 42 |                                                 |           |                                                                                                       |
| 43 |                                                 |           |                                                                                                       |
| 44 |                                                 |           |                                                                                                       |
| 45 |                                                 |           |                                                                                                       |
| 46 |                                                 |           |                                                                                                       |
| 47 |                                                 |           |                                                                                                       |
| 48 |                                                 |           |                                                                                                       |
| 49 |                                                 |           |                                                                                                       |
| 50 |                                                 |           |                                                                                                       |
| 51 |                                                 |           |                                                                                                       |
| 52 |                                                 |           |                                                                                                       |
| 53 |                                                 |           |                                                                                                       |
| 54 |                                                 |           |                                                                                                       |
| 55 |                                                 |           |                                                                                                       |
| 56 |                                                 |           |                                                                                                       |
| 57 |                                                 |           |                                                                                                       |
| 58 |                                                 |           |                                                                                                       |
| 59 |                                                 |           |                                                                                                       |
| 60 |                                                 |           |                                                                                                       |

# BMJ Open

## Research Protocol for a Diagnostic Study: Identifying and Measuring the Severity of Somatic Symptom Disorder Using the Self-reported Somatic Symptom Scale-China (SSS-CN)

|                                 |                                                                                                                                                                                                                                                                                                                                                                                                                                                                                                                                                                                                                                                                                                                                                                                 |
|---------------------------------|---------------------------------------------------------------------------------------------------------------------------------------------------------------------------------------------------------------------------------------------------------------------------------------------------------------------------------------------------------------------------------------------------------------------------------------------------------------------------------------------------------------------------------------------------------------------------------------------------------------------------------------------------------------------------------------------------------------------------------------------------------------------------------|
| Journal:                        | <i>BMJ Open</i>                                                                                                                                                                                                                                                                                                                                                                                                                                                                                                                                                                                                                                                                                                                                                                 |
| Manuscript ID                   | bmjopen-2018-024290.R2                                                                                                                                                                                                                                                                                                                                                                                                                                                                                                                                                                                                                                                                                                                                                          |
| Article Type:                   | Protocol                                                                                                                                                                                                                                                                                                                                                                                                                                                                                                                                                                                                                                                                                                                                                                        |
| Date Submitted by the Author:   | 09-Mar-2019                                                                                                                                                                                                                                                                                                                                                                                                                                                                                                                                                                                                                                                                                                                                                                     |
| Complete List of Authors:       | Jiang, Meng; Renji Hospital, School of Medicine, Shanghai Jiaotong University, Department of Cardiology<br>Zhang, Weituo; Clinical Research Center, School of Medicine, Shanghai Jiaotong University<br>Su, Xuan; Renji Hospital, School of Medicine, Shanghai Jiaotong University, Department of Cardiology<br>Gao, Chuang; Clinical Research Center, School of Medicine, Shanghai Jiaotong University<br>Chen, Bingxu; School of Medicine, Shanghai Jiao Tong University<br>Feng, Zehao; Renji Hospital, School of Medicine, Shanghai Jiaotong University, Department of Cardiology<br>Mao, Jialiang; Renji Hospital, School of Medicine, Shanghai Jiaotong University, Department of Cardiology<br>Pu, Jun; Renji Hospital, School of Medicine, Shanghai Jiaotong University |
| <b>Primary Subject Heading</b>: | Mental health                                                                                                                                                                                                                                                                                                                                                                                                                                                                                                                                                                                                                                                                                                                                                                   |
| Secondary Subject Heading:      | Research methods                                                                                                                                                                                                                                                                                                                                                                                                                                                                                                                                                                                                                                                                                                                                                                |
| Keywords:                       | Somatic Symptom Scale-China, somatic symptom disorder, mental disorders management                                                                                                                                                                                                                                                                                                                                                                                                                                                                                                                                                                                                                                                                                              |
|                                 |                                                                                                                                                                                                                                                                                                                                                                                                                                                                                                                                                                                                                                                                                                                                                                                 |

SCHOLARONE™  
Manuscripts

1  
2  
3 1 **Research Protocol for a Diagnostic Study: Identifying and Measuring the Severity of**  
4  
5 2 **Somatic Symptom Disorder Using the Self-reported Somatic Symptom Scale-China (SSS-**  
6  
7 3  
8 **CN)**  
9  
10 4

11  
12 5 Meng Jiang<sup>a1</sup>, MD, PhD, Weituo Zhang<sup>a2</sup>, PhD, Xuan Su<sup>1</sup>, MD, Chuang Gao<sup>2</sup>, MPH, Bingxu  
13  
14 6 Chen<sup>3</sup>, MD, Zehao Feng<sup>1</sup>, MD, Jialiang Mao<sup>\*1</sup>, MD, PhD, Jun Pu<sup>\*1</sup>, MD, PhD  
15  
16  
17 7

18  
19 8 <sup>1</sup> Department of Cardiology, Renji Hospital, School of Medicine, Shanghai Jiao Tong University,  
20  
21 9 Shanghai, China 200127; <sup>2</sup> Clinical Research Center, School of Medicine, Shanghai Jiao Tong  
22  
23 10 University, Shanghai, China 200025; <sup>3</sup> School of Medicine, Shanghai Jiao Tong University,  
24  
25 11 Shanghai, China 200025  
26  
27  
28 12

29  
30 13 <sup>a</sup> Co-first author: Meng Jiang and Weituo Zhang contributed equally to the paper.  
31

32 14 \* Names and addresses correspondence: Jialiang Mao, MD, PhD; Jun Pu, MD, PhD, FACC,  
33  
34 15 FESC; Department of Cardiology, Renji Hospital, School of Medicine, Shanghai Jiaotong  
35  
36 16 University, Shanghai, China; 160 Pujian Road, Shanghai, China, 200127. Tel: 086-21-68383447,  
37  
38 17 Fax: 086-21-68383447; Email: maojl9@yahoo.com.cn; pujdoc16@163.com.  
39  
40  
41 18

42  
43  
44 19 **Word count:** 4975  
45  
46 20  
47  
48  
49  
50  
51  
52  
53  
54  
55  
56  
57  
58  
59  
60

## 1 ABSTRACT

2 **Aim** The recognition rate of somatic symptom disorder (SSD) in general hospitals is  
3 unsatisfactory. Self-report questionnaires that combine both somatic symptoms and psychological  
4 characteristics are useful in screening for SSD. The Somatic Symptom Scale-China (SSS-CN)  
5 questionnaire was developed due to urgent clinical demand. The aim of this research is to validate  
6 the self-reported SSS-CN as a timely and practical instrument to identify SSD and to assess the  
7 severity of this disorder.

8 **Methods and Analysis** At least 852 patients without organic disease but presenting with  
9 physical discomfort will be recruited at a general hospital. Each patient will undergo a DSM-5-  
10 guided physician diagnosis, including disease identification and severity assessment, as a  
11 reference standard. This research will utilize the SSS-CN to evaluate its diagnostic performance  
12 in SSD compared to that of the Patient Health Questionnaire-15 (PHQ-15) and other SSD-  
13 related questionnaires. Statistical tests for the area under the curve (AUC) and volume under the  
14 surface (VUS) of the receiver operating curve (ROC) will be used to compare the accuracy of the  
15 SSD identification and severity assessment, respectively. In addition to this standard diagnostic  
16 study, we will conduct follow-up investigations to explore the characteristics of the SSS-CN in  
17 monitoring treatment effects.

18  
19  
20 **Ethics and Dissemination** Ethical approval was provided by the Renji Hospital Human  
21 Research Ethics Committee, approval number 2015016. The findings of this study will be  
22 disseminated via peer-reviewed journals and presented at international conferences.

23 Trial registration number: NCT03513185

24

## 1 **Strengths and Limitations of this Study**

- 2 1. First, we introduce a tool to benefit patients and to facilitate daily clinical work. The  
3 primary goal is to screen suspected somatic symptom disorder (SSD) patients via accurate  
4 and brief diagnostic tools. Patients will benefit by improving their awareness of the disease  
5 and their ability to self-monitor their symptoms. Additionally, the tool provides clinicians  
6 with an easy-to-use questionnaire that can be completed quickly and combines both  
7 somatic and psychological features.
- 8 2. Second, our previous study has shown the reliability and factorial validity of the Somatic  
9 Symptom Scale-China (SSS-CN) by utilizing an early version of the scale. The current study  
10 further modifies the SSS-CN based on the DSM-5 and, for the first time, is applied to  
11 evaluate its clinical utility.
- 12 3. A potential limitation of this study is that it represents the efficacy of the SSS-CN only in  
13 patients without organic disease. Further research on the application of SSS-CN in patients  
14 with both SSD and diagnosed medical disorders is required.
- 15 4. Because only patients without a positive physical examination will be referred to the special  
16 clinic, a referral bias exists due to the nature of our clinic. Moreover, the epidemiology of  
17 health care facilities is different from that of general hospitals; therefore, the diagnostic  
18 accuracy in a health care sample needs additional investigation.
- 19 5. The potential of monitoring the treatment effect will be affected by loss to follow-up bias  
20 due to the unpredictable pattern of loss to follow-up.

## 22 **Keywords**

23 Somatic Symptom Scale-China; somatic symptom disorder; mental disorders management

## 1 INTRODUCTION

2 One of the common medical conditions observed in general hospitals is somatic symptom  
3 disorder (SSD) and related disorders<sup>1 2</sup>. SSD refers to symptoms that are often difficult to explain  
4 after adequate evaluation<sup>3</sup>; even when a significant medical disease is present, the patients'  
5 symptoms may nonetheless be unrelated to their disease<sup>2</sup>. The diagnosis of SSD emphasizes the  
6 existence of symptoms and signs (one or multiple somatic symptoms plus abnormal thoughts,  
7 feelings, and behaviours in response to these symptoms)<sup>2</sup>. The disorder has an estimated current  
8 prevalence in the general population of 5-7%<sup>2</sup>. The prevalence is estimated to be higher in  
9 China<sup>4</sup>. Individuals with somatic symptoms are commonly encountered in general hospitals and  
10 primary care as well as in psychiatric and other mental health settings<sup>2</sup>. The recognition rate of  
11 SSD is unsatisfactory due to the diagnostic complexity, and some physicians may not feel  
12 sufficiently trained to evaluate patients with suspected SSD; thus, SSD could be underdiagnosed  
13 in routine care. Therefore, patients may sustain somatic symptoms without appropriate treatment  
14 due to the lack of awareness of SSD. Patients with somatization had approximately twice as  
15 much cost as patients without somatization on medical care utilization and annual medical care.  
16 An estimated \$256 billion in annual medical care costs is attributable to the incremental effects  
17 of somatization alone<sup>1</sup>. Whereas depression and anxiety disorders are widely researched, SSD has  
18 been far less studied. Follow-up or treatment studies of this disorder are even scarcer. Hence, it  
19 is highly important that physicians are prepared to identify SSD, assess the symptom severity and  
20 treat it in a timely manner; failure to do so can result in high degrees of morbidity, lost  
21 productivity, and overutilization of medical resources<sup>5 6</sup>.

22 The fifth edition of the Diagnostic and Statistical Manual of Mental Disorders (DSM-5) aims to  
23 identify SSD patients and assessing the severity of the disorder<sup>2</sup>. It agreed that the SSD  
24 companioned anxiety and depressive disorder (in approximately 57.7% of SSD patients)<sup>1</sup> adds  
25 severity and complexity to the somatic components. It emphasizes that it is important to evaluate  
26 patients in terms of their psychological situation, behaviour and physical condition altogether



1 and then treat the patients according to the severity of the disorder. It also emphasizes the  
2 evaluation in subjects who have excessive concerns about health issues. Recent studies, including  
3 one by Laferton et al., have also indicated that the combination of self-report measures could  
4 increase diagnostic quality in clinical practice<sup>7</sup>. The DSM-5, however, is clinically difficult to  
5 follow because it depends on qualified and experienced physicians conducting an interview<sup>8</sup>,  
6 which makes clinicians in the general hospital feel less confident in dealing with such individuals.  
7 On the other hand, individuals in China usually refuse to receive psychological counselling. Thus,  
8 in general medical hospitals, non-psychiatric physicians must face more patients with  
9 psychological symptoms. It is more favourable to have a tool to screen suspected SSD patients  
10 via accurate and brief diagnostic questionnaires and to facilitate daily clinical work. A series of  
11 studies has focused on this issue; the Patient Health Questionnaire-15 (PHQ-15) and the  
12 Somatic Symptom Scale-8 are screening tools for SSD<sup>9 10</sup>; however, these types of self-report  
13 questionnaires do not incorporate psychological features. The Whiteley Index-7 focuses on  
14 health anxiety<sup>11</sup>, the Scale for the Assessment of Illness Behavior questionnaires focuses on  
15 excessive illness behaviour, and the Somatic Symptom Scale-12 assesses psychological features<sup>12</sup>  
16 <sup>13</sup>. The latter three questionnaires focus less on physical features.

17 Based on published studies, we aim to develop a self-administered questionnaire to provide a  
18 comprehensive reflection of both somatic and psychological features. The Somatic Symptom  
19 Scale-China (SSS-CN) questionnaire was developed based on the DSM-5. Psychology and  
20 behaviour items are interleaved with somatic symptoms. It incorporates affective, cognitive, and  
21 behavioural components. It is designed to be used in general medical facilities and to provide  
22 clinicians with an easy-to-use questionnaire to detect both somatic and psychological features in a  
23 time-saving way.

## 24 **Study Objectives and Research Questions**

25 Primary objective

1  
2  
3 1 The primary objective of this study is to test two types of diagnostic accuracy with a DSM-5-guided  
4  
5 2 physician diagnosis as the reference standard: (1) the accuracy of the SSS-CN compared to the  
6  
7 3 PHQ-15 for identifying SSD and (2) the accuracy of the SSS-CN compared to the PHQ-15 for  
8  
9 4 assessing severity.

10  
11  
12 5 Secondary objective

13  
14  
15 6 The secondary objective is to explore the potential utility of the SSS-CN in monitoring the  
16  
17 7 treatment effect. We intend to observe the trends in how the score of the SSS-CN and other  
18  
19 8 questionnaires after treatment changes over time.  
20  
21  
22  
23  
24  
25  
26  
27  
28  
29  
30  
31  
32  
33  
34  
35  
36  
37  
38  
39  
40  
41  
42  
43  
44  
45  
46  
47  
48  
49  
50  
51  
52  
53  
54  
55  
56  
57  
58  
59  
60

## 1       2       3       4       5       6       7       8       9       10       11       12       13       14       15       16       17       18       19       20       21       22       23       24       25       26       27       28       29       30       31       32       33       34       35       36       37       38       39       40       41       42       43       44       45       46       47       48       49       50       51       52       53       54       55       56       57       58       59       60

# 1       **METHODS**

## 2       **Study Overview**

3       This study will use a prospective diagnostic design and will be conducted at a tertiary general  
4       hospital in Shanghai, China. The study protocol was approved by the ethics committees of Renji  
5       Hospital, and written informed consent will be obtained from all study participants. The clinical  
6       trial registration can be found at <https://register.clinicaltrials.gov/>, and the registration number is  
7       NCT03513185.

8       Particular attention will be paid to the appropriate storage of the data. Patient confidentiality will  
9       be maintained, and no identifying features of the patients will be published. The protocol  
10      development will adhere to the European Medicines Agency guidelines for diagnosis study<sup>14</sup>.

## 11      **Description of the SSS-CN and Assessment of Severity**

12      The SSS-CN is a somatic and psychological symptom scale (**Figure 1**) derived from the DSM-  
13      5. It is designed to assess the presence and severity of the symptoms. Our previous study validated  
14      its reliability and validity<sup>15</sup>. The test-retest reliability was 0.9. The correlation coefficient between  
15      each dimension and the total was between 0.76 and 0.88, and the correlation coefficient within  
16      dimensions was 0.56-0.70.

17      The questionnaire is self-administered with an abbreviated 20-item measure. Briefly, in that  
18      study, the SSS-CN was composed of 4 dimensions: physical disorder, anxiety disorder, depression  
19      disorder, and anxiety and depression disorder. The SSS-CN assesses 10 somatic clusters that  
20      account for 50% of the physical complaints (1 item per body system, items 1, 5, 9, 10, 12, 13, 16,  
21      and 18-20). Anxiety and depression items account for the remaining 50% (anxiety, 20% (4/20),  
22      items 6, 14, 15, and 17; depression, 20% (4/20), items 3, 4, 7, and 11; and anxiety and depression,  
23      10%, items 2 and 8). Subjects answer the following question: “Since you have felt unwell, how  
24      often have you been bothered in the previous 6 months by any of the following problems?” For  
25      scoring, the subjects rate the frequency of each symptom as 1 (“does not exist”), 2 (“the problem

1 occurred occasionally for a couple of days per month and/or is endurable”), 3 (“the problem  
2 occurred almost half of the days per month and/or I hope it will ease up”) or 4 (“the problem  
3 occurred almost every day and/or is unendurable”). Thus, in determining the SSS-CN score, each  
4 question has a score ranging from 1 to 4, corresponding to the frequency of the problem  
5 occurrence, and the total score ranges from 20 to 80. The severity categories are assessed according  
6 to the sum of the scores. The SSS-CN scores range from 20 to 29, 30 to 39, 40 to 59, and  $\geq 60$  and  
7 represent normal, mild, moderate, and severe SSD, respectively. The selection of these cut-off  
8 values takes into account the results of our previous study<sup>16</sup> (a cut-off score of 30 was obtained  
9 from the receiver operating curve (ROC), reaching a sensitivity of 0.97 and a specificity of 0.96)  
10 and clinical experience.

## 11 **Study Design**

12 The study is composed of 2 stages (Figure 2) corresponding to the primary and secondary research  
13 objectives. The first stage is a prospective diagnostic stage to test the diagnostic performance of  
14 the SSS-CN questionnaire. The second stage is an exploratory follow-up stage that uses the SSS-  
15 CN questionnaire as a tool to monitor treatment effects.

16 Briefly, consecutive outpatients with physical discomfort presenting to internal medicine  
17 departments in a tertiary hospital in China will first undergo the corresponding examination to  
18 exclude organic disease. For example, a patient with chest pain would be recommended by a  
19 physician to receive an EKG, echocardiography, a treadmill test or coronary angiography to  
20 exclude cardiovascular disease. Patients with no organic disease that can account for their  
21 discomfort will be considered to have a probable psychosomatic disorder. These patients will then  
22 be transferred to a specialist clinic for the diagnosis and treatment of suspected SSD (the initial  
23 consultation). They will fill out the SSS-CN questionnaire, we use other self-reported instruments  
24 including PHQ15, Patient Health Questionnaire-9 (PHQ-9), Generalized Anxiety Disorder Scale-7  
25 (GAD-7) and SF-20, to verify the structural validity of SSS-CN. Non-clinical research assistants

1  
2  
3 1 will collect the questionnaires and determine the scores. A physician or a psychologist who is blind  
4  
5 2 to the results of the SSS-CN will separately interview the patient to diagnose SSD base on the  
6  
7 3 standard interview according to the corresponding DSM-5 criterion. Prescriptions will be given if  
8  
9 4 the patient is diagnosed with SSD. Follow ups will be scheduled at 2, 6, and 10 weeks to repeat the  
10  
11 5 questionnaires for patients receiving medications (the follow-up consultation). Because health-  
12  
13 6 related quality of life is often impaired in patients with SSD, the 20-item Short Form Health  
14  
15 7 Survey (SF-20) will be administered as an indicator of therapeutic effects during follow-up.

## 19 8 **Participants and Procedure**

### 22 9 Inclusion criteria

23  
24  
25 10 (1) Patients aged 18-80 years old; (2) patients who have no previous diagnosis of somatic disease;  
26  
27 11 (3) patients without systemic disease that can account for their physical discomfort; and (4) patients  
28  
29 12 enrolled as outpatients after they agree to complete the questionnaires and undergo assessment by  
30  
31 13 a physician will meet the inclusion criteria.

### 34 14 Exclusion criteria

35  
36  
37 15 (1) Patients who have lost their self-assessment ability or refuse to participate; (2) patients who  
38  
39 16 have been previously confirmed to have mental disorders, mental retardation or dementia; (3)  
40  
41 17 patients who are taking anti-anxiety agents or anti-depression agents; and (4) patients who are  
42  
43 18 deemed unable to complete face-to-face follow-up after at least 1 month (such as those who live  
44  
45 19 abroad) will be excluded from the study.

### 48 20 Reference standard

49  
50  
51 21 Patients were interviewed by a standard procedure. A structured clinical interview (SCID-5-CV)  
52  
53 22 according to the corresponding DSM-5 criterion was used by the physician. The interview  
54  
55 23 questions include modules from somatic symptom and related disorder to depression disorder,  
56  
57 24 anxiety disorder, obsessive-compulsive related disorder and sleep-wake disorders. The test time is  
58  
59 25 approximately 30-45 minutes. The physician further assesses the severity based on the number of

1 symptoms specified in excessive thoughts, feeling, or behaviours related to the somatic symptoms  
2 or associated health concerns (mild-1 symptom; moderate-two or more of the symptoms; severe-  
3 two or more of the symptoms plus multiple somatic complaints). The physician assessment is set  
4 as the reference standard. The physician team is composed of both general hospital “specified  
5 physicians” (that is, physicians qualified as national psychological counsellors) and psychologists.  
6 When there is diagnostic uncertainty, the patient will be referred to the senior physician to obtain  
7 a diagnosis.

#### 8 Obtaining informed consent

9 The trained researched will give the patients informed consent and provide all necessary  
10 information about this study to the potential participants. It will be made clear to participants that  
11 they are under no obligation to take part, their usual care will not be affected by their decision, and  
12 they can withdraw consent without giving a reason. Participants will be given a sheet with contact  
13 details for the research team and instructions on what to do if they wish to withdraw or require  
14 further information.

#### 15 Blinding

16 After a patient with suspected SSD is transferred to the specialist clinic, the patient will first  
17 complete the questionnaires in a separate room, and the research assistant will help the patient  
18 understand the questions. Then, an initial consultation will be blindly conducted by a physician  
19 who has been qualified as a national psychological counsellor. An independent diagnosis and  
20 severity category will be assigned by the physician. The duration of the self-reported scale and the  
21 physician assessment will be separately recorded.

#### 22 Medication

23 The patients will be informed of the results immediately after the physician consultation and the  
24 questionnaire completion. During the follow-up consultations, the patients will be allowed to  
25 communicate with the doctor throughout the diagnosis and treatment. Because patients in China

1 usually refuse to accept psychotherapy<sup>4 17</sup>, medications will be prescribed according to the  
2 physician's evaluation. Anti-anxiety treatment or anti-depression treatment will be selectively  
3 administered according to the severity of the somatic symptom burden. Generally, members of  
4 the thioxanthene class, such as Deanxit, are used for mild symptoms; selective serotonin reuptake  
5 inhibitors (SSRIs) are applied for moderate symptoms; and serotonin-norepinephrine reuptake  
6 inhibitors (SNRIs) are applied for severe symptoms, with the serotonin antagonist and reuptake  
7 inhibitor (SARI) class prescribed if sleeping problems exist.

### 8 **Follow-up**

9 A face-to-face interview will be scheduled at 2, 6, and 10 weeks for patients taking medication.  
10 The subject will complete 5 questionnaires (SSS-CN, PHQ15, PHQ-9, GAD-7 and SF-20) both  
11 at the initial consultation and at the week 10 follow-up. The SF-20 survey aimed to evaluate quality  
12 of life. At the week 2 and week 6 follow ups, 4 questionnaires will be completed (SSS-CN, PHQ15,  
13 PHQ-9, GAD-7).

### 14 **Outcome Measures**

#### 15 Reliability and validity

16 Reliability will be measured by Cronbach's alpha. A randomized sample of approximately 100  
17 participants will be asked to complete the questionnaires 1 week after the initial completion to  
18 analyse the test-retest reliability.

19 The criterion validity will be determined by assessment of the presence and severity of SSD  
20 between the reference standard (physician assessment based on structure interview) and the SSS-  
21 CN questionnaire.

22 The SSS-CN consists of 10 questions for somatic symptoms, 4 for depression, 4 for anxiety, and  
23 2 for depression and anxiety. The construct validity will be tested by confirmatory factor analysis,  
24 comparing the corresponding factors with the PHQ-15, PHQ-9 and GAD-7.

## 1 Diagnostic performance

2 The diagnostic accuracy of a questionnaire for SSD identification is measured by the area under  
3 the curve (AUC) of an ROC, the sensitivity/specificity under a prespecified cut-off value, and the  
4 positive/negative predictive values in the study population, referring to the physician diagnosis as  
5 the reference standard. The accuracy of the severity assessment of a questionnaire is measured by  
6 the VUS (volume under the surface), which is a multi-class generalization of AUC of ROC between  
7 the questionnaire score and the physician's severity assessment<sup>18</sup>.

## 8 Other Clinical utilities

9 Convenience in clinical practice is measured by the average time taken to complete each  
10 questionnaire or receive a diagnosis from a physician.

11 Clinical utility in monitoring treatment efficacy in patients is measured by correlation with the SF-  
12 20 during follow-up visits.

## 13 Sample Size Calculation

14 The sample size calculation considers the comparison of diagnostic accuracy for both SSD  
15 identification and severity assessment, whichever is larger. In the pilot study, the prevalence of  
16 SSD was 76.9% in the study population who were referred to the special clinics (where physicians  
17 qualified as national psychological counsellors and psychologists practice medicine), the AUC of  
18 the ROC for PHQ-15 was 0.88, and the VUS of multi-class ROC for PHQ-15 score with respect  
19 to the severity assessment was 0.7. The correlation between the SSS-CN and PHQ-15 scores was  
20 set to 0.6. With a non-inferiority margin of 0.05,  $\alpha=0.025$ , and  $\beta=0.8$ , the sample size for SSD  
21 diagnosis was 852. With a non-inferiority margin of 0.1,  $\alpha=0.025$ , and  $\beta=0.8$ , the sample size for  
22 severity assessment was 517. Therefore, as the overall sample size of this study was  $N=852$  with  
23 SSD-positive  $N+=655$  and SSD-negative  $N-=197$ , both the positive and negative sample size  
24 requirements were met.

## 25 Statistical Analysis



1 We will report our results according to STARD. We will compute the median (P25, P75) scores  
2 for each questionnaire and the number and percentage of patients (%) in each diagnostic category  
3 as descriptive statistics.

4 Reliability will be measured using Cronbach's  $\alpha$ . The criterion validity will be measured by the  
5 kappa coefficient between the questionnaire score and the physician assessment. Construct validity  
6 will be tested using confirmatory factor analyses.

7 The primary analysis of the diagnostic performance will consist of two comparisons using  
8 Bonferroni's correction: (1) the non-inferior comparison of the SSS-CN with the PHQ-15 in SSD  
9 diagnostic accuracy as measured by the AUC of the ROC with  $\Delta=0.05$ ,  $\alpha=0.025$  in the whole  
10 study population using Delong's method<sup>19</sup> and (2) Severity of PHQ-15 were based on scores,  
11 normal (score 0–4), low (score 5–9), medium (score 10–14), and high (score 15–30). SSS-CN  
12 scores range from 20 to 29, 30 to 39, 40 to 59, and  $\geq 60$  and represent normal, mild, moderate, and  
13 severe SSD, respectively. The non-inferior comparison of the SSS-Ch with the PHQ-15 in SSD  
14 severity assessment measured by VUS with  $\Delta=0.1$ ,  $\alpha=0.025$  in the population with a confirmed  
15 SSD diagnosis using Z test<sup>18</sup>. Both comparisons refer to the physician's diagnosis as the reference  
16 standard. If either non-inferiority criterion is met, the corresponding superiority will be tested.

17 As a secondary analysis, the sensitivity, specificity, and positive and negative predictive values will  
18 also be reported. Prespecified cut-off values will be validated. In addition, we will compare the  
19 time needed to complete each questionnaire and be diagnosed by a physician. In the follow-up  
20 data, questionnaire scores by time will be demonstrated in a line chart with error bars.

21 Missing values will be imputed with multiple imputation under the assumption of MAR<sup>17</sup>.  
22 Subgroup analysis according to gender and age will also be conducted. All statistical analyses will  
23 be performed with R (version 3.5.1)

## 24 **Patient and Public Involvement Statement**

1  
2  
3 1 Patients were involved at the design stage of the trial, including ensuring that the content of the  
4  
5 2 SSS-CN questionnaire can be understood, the length of the consultation time, the manner of  
6  
7 3 notification of the disease condition, the follow-up method, and the dissemination of the results  
8  
9  
10 4 are acceptable. Before the formal recruitment started, we received feedback from patients who  
11  
12 5 had SSD during a pretest of the case report form (CRF) and used it to improve the final design  
13  
14 6 of the CRF. We carefully assessed the burden of the trial interventions on patients. We intend to  
15  
16 7 disseminate the main results to the trial participants via email. The study outcomes will be  
17  
18 8 disseminated in conference reports and academic publications.  
19  
20

### 21 9 **Current Status**

22  
23  
24 10 The first study participant was enrolled in November 2017. As of Mar 2019, patient recruitment  
25  
26 11 has not been completed.  
27  
28  
29  
30  
31  
32 13

## 1 DISCUSSION

2 In this study protocol, we describe a diagnostic study design that evaluates the efficacy of a newly  
3 developed somatic and psychological symptom scale adapted to China for patients with suspected  
4 somatic diseases that might be applied as a first-line instrument for screening and monitoring  
5 treatment efficacy in individual outpatient consultations. We expect that a physician will benefit  
6 from the SSS-CN on a clinically significant level through improved self-confidence and timeliness  
7 and that the participants will benefit by improving their awareness of the disease and ability to self-  
8 monitor their symptoms. Moreover, we will examine the characteristics of the SSS-CN compared  
9 with another somatic symptom questionnaire (PHQ15).

10 Our SSS-CN is designed as a “one-stop shop” tool that combines somatic items with mental  
11 disorder items. This design is consistent with the suggestion in the DSM-5 that somatic symptoms  
12 are likely accompanied by depression and anxiety<sup>1</sup>. Somatic and mental symptoms may interact,  
13 and mental symptoms may be triggered differently than conventional mental diseases in this group.  
14 Clinically, it is not easy to clearly separate the body from mental status, and the significance of each  
15 item is unknown. We caution that 50% of mental items have the possibility of increasing the  
16 incidence of SSD, and a subgroup score with somatic symptom items alone is used for this  
17 appraisal.

18 The study has several strengths. First, we will introduce a tool to facilitate daily clinical work. The  
19 tool provides clinicians with an easy-to-use questionnaire in screening suspected SSD patients and  
20 to refer the patients to specific doctors. Second, our previous study has shown the reliability and  
21 factorial validity of the SSS-CN by utilizing an early version of it<sup>15</sup>. The current study further  
22 modifies the SSS-CN based on the DSM-5 and, for the first time, evaluates its clinical utility. Third,  
23 patients will benefit by improving their awareness of the disease and their ability to self-monitor  
24 their symptoms.

1 This trial has some limitations. First, SSD can be accompanied by diagnosed medical disorders.  
2  
3 The current study, however, represents the efficacy of the SSS-CN only in patients without  
4  
5 organic diseases. Therefore, further research on the application of SSS-CN in patients with both  
6  
7 SSD and diagnosed medical disorders is required. Moreover, the epidemiology of primary health  
8  
9 care facilities is different from the epidemiology of general hospitals; therefore, the diagnostic  
10  
11 accuracy in a health care sample needs additional investigation. Second, the study was designed  
12  
13 as a mid-term investigation with four measurement time points, and thus missing data must be  
14  
15 considered. Referring to the fact that only 16% of patients in the primary care evaluation of  
16  
17 mental disorders (PRIME-MD) study were involved in the follow-up<sup>18</sup>, we estimate that a high  
18  
19 rate of missing data will also occur in our patients. Because of the difficulty of compliance, only a  
20  
21 small fraction (16% by estimation) of patients in study would be involved in the follow-up, and  
22  
23 the result of monitoring the treatment effect may be affected by loss to follow-up bias.  
24  
25  
26 This study will help to clarify whether the developed SSS-CN score is an effective tool for rapid  
27  
28 screening and assessment of severity in patients with suspected SSD in a general hospital clinic  
29  
30 and for convenient follow-up. If the SSS-CN is found to be effective, it can be implemented as a  
31  
32 first-line screening and follow-up option. Additionally, we expect that the SSS-CN could provide  
33  
34 personalized information to consulting physicians in a timely manner. The study results will  
35  
36 contribute to better outpatient care for patients with SSD.  
37  
38  
39  
40  
41  
42  
43  
44  
45  
46  
47  
48  
49  
50  
51  
52  
53  
54  
55  
56  
57  
58  
59  
60

1  
2  
3 **Acknowledgements:** We thank all the patients who participated and advised us throughout the  
4 study design and implementation for their contributions.  
5  
6

7 **Conflict of interests:** The authors declare that they have no competing interests.  
8  
9

10 **Ethical approval:** Ethical approval was provided by the Renji Hospital Human Research Ethics  
11 Committee, approval number 2015016.  
12  
13

14 **Consent for publication:** All participants to date have provided written informed consent.  
15  
16

17 **Authors' contributions:** MJ: substantial contributions to the conception, design and  
18 interpretation of data, drafting and critical revisions for important intellectual content. WTZ:  
19 analysis, statistics and interpretation of data, drafting the manuscript. XS: design and  
20 implementation of study, acquisition of data, analysis and interpretation of data, drafting the  
21 manuscript. CG: analysis, statistics and interpretation of data. BXC: acquisition of data, analysis  
22 and interpretation of data, drafting the manuscript. ZHF: acquisition of data, analysis and  
23 interpretation of data, drafting the manuscript. JLM: substantial contributions to the conception,  
24 design and interpretation of data, critical revisions for important intellectual content. JP: substantial  
25 contributions to the conception, design and interpretation of data.  
26  
27  
28  
29  
30  
31  
32  
33  
34  
35

36 **Funding:** This work was supported by the National Natural Science Foundation of China  
37 (81470391 and 81470389); National Science Fund for Distinguished Young Scholars (81625002);  
38 Shanghai ShenKang Hospital Development Center (16CR3020A and 16CR3034A); Shanghai  
39 Municipal Education Commission Gaofeng Clinical Medicine Grant Support (20172014 and  
40 20152209); Shanghai Outstanding Academic Leaders Program (18XD1402400); Shanghai Pudong  
41 Health Development Center (PW2018D-03); Shanghai Jiaotong University (YG2016MS45 and  
42 YG2015ZD04).  
43  
44  
45  
46  
47  
48  
49  
50  
51

52 **Registration name:** The validation and utility of the Somatic Symptom Scale-China (SSS-CN) for  
53 assessing somatic symptom disorder in general hospital outpatients.  
54  
55  
56  
57  
58  
59  
60

## REFERENCES

1. Barsky AJ, Orav EJ, Bates DW. Somatization increases medical utilization and costs independent of psychiatric and medical comorbidity. *Archives of general psychiatry* 2005;62(8):903-10. doi: 10.1001/archpsyc.62.8.903
2. American Psychiatric Association: Diagnostic and Statistical Manual of Mental Disorders, Fifth Edition (DSM-5). Arlington, VA: American Psychiatric Association Publishing 2013.
3. Barsky AJ. Assessing somatic symptoms in clinical practice. *JAMA Intern Med* 2014;174(3):407-8. doi: 10.1001/jamainternmed.2013.12177
4. Liang D, Mays VM, Hwang WC. Integrated mental health services in China: challenges and planning for the future. *Health Policy Plan* 2018;33(1):107-22. doi: 10.1093/heapol/czx137
5. Jr SG. The course of somatization and its effects on utilization of health care resources. *Psychosomatics* 1994;35(3):263.
6. Hahn SR, Kroenke K, Spitzer RL, et al. The difficult patient: prevalence, psychopathology, and functional impairment. *Journal of General Internal Medicine* 1996;11(1):1.
7. Laferton JAC, Stenzel NM, Rief W, et al. Screening for DSM-5 Somatic Symptom Disorder: Diagnostic Accuracy of Self-Report Measures Within a Population Sample. *Psychosom Med* 2017;79(9):974-81. doi: 10.1097/PSY.0000000000000530
8. Axelsson E, Andersson E, Ljotsson B, et al. The health preoccupation diagnostic interview: inter-rater reliability of a structured interview for diagnostic assessment of DSM-5 somatic symptom disorder and illness anxiety disorder. *Cogn Behav Ther* 2016;45(4):259-69. doi: 10.1080/16506073.2016.1161663
9. Gierk B, Kohlmann S, Kroenke K, et al. The somatic symptom scale-8 (SSS-8): a brief measure of somatic symptom burden. *JAMA Intern Med* 2014;174(3):399-407. doi: 10.1001/jamainternmed.2013.12179
10. Gierk B, Kohlmann S, Toussaint A, et al. Assessing somatic symptom burden: a psychometric comparison of the patient health questionnaire-15 (PHQ-15) and the somatic symptom scale-8 (SSS-8). *J Psychosom Res* 2015;78(4):352-5. doi: 10.1016/j.jpsychores.2014.11.006
11. Tu CY, Liao SC, Liu CY, et al. Application of the Chinese Version of the Whiteley Index-7 for Detecting DSM-5 Somatic Symptom and Related Disorders. *Psychosomatics* 2016;57(3):283-91. doi: 10.1016/j.psym.2015.12.010
12. Toussaint A, Murray AM, Voigt K, et al. Development and Validation of the Somatic Symptom Disorder-B Criteria Scale (SSD-12). *Psychosom Med* 2016;78(1):5-12. doi: 10.1097/PSY.0000000000000240
13. Toussaint A, Lowe B, Braehler E, et al. The Somatic Symptom Disorder - B Criteria Scale (SSD-12): Factorial structure, validity and population-based norms. *J Psychosom Res* 2017;97:9-17. doi: 10.1016/j.jpsychores.2017.03.017
14. European Medicines Agency. Pre-authorisation Evaluation of Medicines for Human Use: Guideline on clinical evaluation of diagnostic agents. [http://www.ema.europa.eu/docs/en\\_GB/document\\_library/Scientific\\_guideline/2009/09/WC500003584.pdf](http://www.ema.europa.eu/docs/en_GB/document_library/Scientific_guideline/2009/09/WC500003584.pdf).
15. Qi Z, Jialiang M, Chunbo L, et al. Developing of somatic self-rating scale and its reliability and validity. *Chinese Journal of Behavioral Medicine and Brain Science* 2010;19(9):847-9.
16. Organization WH. The ICD-10 Classification of Mental and Behavioural Disorders: Clinical Description and Diagnostic Guidelines: WHO 1993.
17. Leong FT, Lau AS. Barriers to providing effective mental health services to Asian Americans. *Ment Health Serv Res* 2001;3(4):201-14.
18. Nakas CT, Yiannoutsos CT. Ordered multiple-class ROC analysis with continuous measurements. *Stat Med* 2004;23(22):3437-49. doi: 10.1002/sim.1917

1  
2  
3 19. DeLong ER, DeLong DM, Clarke-Pearson DL. Comparing the areas under two or more  
4 correlated receiver operating characteristic curves: a nonparametric approach.  
5 *Biometrics* 1988;44(3):837-45.  
6  
7  
8  
9  
10  
11  
12  
13  
14  
15  
16  
17  
18  
19  
20  
21  
22  
23  
24  
25  
26  
27  
28  
29  
30  
31  
32  
33  
34  
35  
36  
37  
38  
39  
40  
41  
42  
43  
44  
45  
46  
47  
48  
49  
50  
51  
52  
53  
54  
55  
56  
57  
58  
59  
60

For peer review only

1  
2  
3 **Figure Legends**  
4

5  
6 **Figure 1** The Somatic Symptom Scale-China (SSS-CN).  
7

8 **Figure 2** Study flow. SSS-CN, Somatic Symptom Scale-China; PHQ-15: Patient Health  
9 Questionnaire-15; PHQ-9: Patient Health Questionnaire-9; GAD-7: Generalized Anxiety  
10 Disorder Scale-7; SF-20: 20-Item Short Form Health Survey; SSD: Somatic Symptom Disorder.  
11  
12  
13  
14  
15  
16  
17  
18  
19  
20  
21  
22  
23  
24  
25  
26  
27  
28  
29  
30  
31  
32  
33  
34  
35  
36  
37  
38  
39  
40  
41  
42  
43  
44  
45  
46  
47  
48  
49  
50  
51  
52  
53  
54  
55  
56  
57  
58  
59  
60



### Self-rating Somatic Symptoms Scale

#### 1. Basic information

Name \_\_\_\_\_ Mobile phone \_\_\_\_\_ Gender \_\_\_\_ Age \_\_\_\_ Education level \_\_\_\_\_ Occupation \_\_\_\_\_  
 Date \_\_\_\_ Course of symptoms \_\_\_\_\_ Number of Self-rating \_\_\_\_\_ Historical diagnosis \_\_\_\_\_  
 Medications administered \_\_\_\_\_

#### 2. Instruction:

To better understand the degree to which you're bothered by the problems, please read carefully the following 20 items and CIRCLE the corresponding points at the right column that best describe your health. All the items listed in this questionnaire are REQUIRED.

1: not existent

2: the problem occurred occasionally for a couple of days per-month and/or is endurable

3: the problem occurred almost half days per-month and/or hoping to ease up

4: the problem occurred almost every day and/or unendurable

In the past 6 month, do you have the following symptoms:

|     |                                                                                                                                                  |   |   |   |   |
|-----|--------------------------------------------------------------------------------------------------------------------------------------------------|---|---|---|---|
| 1)  | Dizziness, swelling in the head, heavy head, headache, spinning head, faint, buzzing in head                                                     | 1 | 2 | 3 | 4 |
| 2)  | Trouble sleeping (difficulty falling asleep/staying asleep, waking up too early, oversleeping, easily dream, nightmare, awakened for no reason ) | 1 | 2 | 3 | 4 |
| 3)  | Feeling tired or having low energy                                                                                                               | 1 | 2 | 3 | 4 |
| 4)  | Losing interest, moody, don't want to be bothered, lacking patience                                                                              | 1 | 2 | 3 | 4 |
| 5)  | Chest pain, shortness of breath, racing/pounding/fluttering heart, chest tightness                                                               | 1 | 2 | 3 | 4 |
| 6)  | Easily anxious, nervous, feeling scared, panicky, feeling I'm going to die, out of control                                                       | 1 | 2 | 3 | 4 |
| 7)  | Worried, apprehensive, negative ideation                                                                                                         | 1 | 2 | 3 | 4 |
| 8)  | Reduced attention & thinking abilities, forgetful, absentminded                                                                                  | 1 | 2 | 3 | 4 |
| 9)  | Bloating, stomach pain, gas, loss of appetite, constipation, loose bowels, nausea, becoming thin, dry or bitter mouth                            | 1 | 2 | 3 | 4 |
| 10) | Pain in the neck, back, shoulders, waist, arm, legs                                                                                              | 1 | 2 | 3 | 4 |
| 11) | Sensitive, easily sad and crying                                                                                                                 | 1 | 2 | 3 | 4 |
| 12) | Unusual sensations in the joints of hands or legs (numb, rigid, twitching, shivering, pricking, chilly)                                          | 1 | 2 | 3 | 4 |
| 13) | Blurry vision, eye dryness, eye pain or swelling, decreased eye vision over a short period of time                                               | 1 | 2 | 3 | 4 |
| 14) | Easily agitated or irritable, sensitive to voice, susceptible to startle                                                                         | 1 | 2 | 3 | 4 |
| 15) | Obsessive-compulsive thoughts or behaviors                                                                                                       | 1 | 2 | 3 | 4 |
| 16) | Skin allergies, itching, rash, skin flushing, hot flash, sweating                                                                                | 1 | 2 | 3 | 4 |
| 17) | Excess concerns about health issues, excessive worry that you or family members are ill                                                          | 1 | 2 | 3 | 4 |
| 18) | Difficulty breathing, feeling oppressed or suffocated, frequent long sigh, coughing, intercostal pain                                            | 1 | 2 | 3 | 4 |
| 19) | Choking feeling in the throat, nasal dryness and obstruction, ringing in the ears or ear blockage                                                | 1 | 2 | 3 | 4 |
| 20) | Frequent urination, urgent need to urinate, painful urination, or discomfort in perineum                                                         | 1 | 2 | 3 | 4 |

Functional impairment in work, study, family life, and interpersonal relationship: Not at all, A little bit, Quite a bit, or Very much/Severe

Figure 1

210x297mm (300 x 300 DPI)

Figure 2

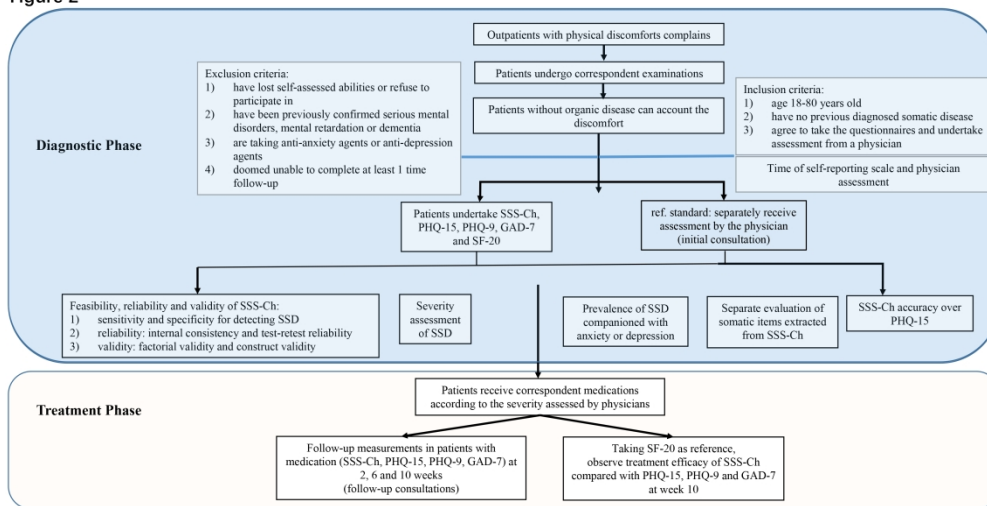

Figure 2

338x190mm (300 x 300 DPI)

1  
2  
3  
4  
5  
6  
7  
8  
9  
10  
11  
12  
13  
14  
15  
16  
17  
18  
19  
20  
21  
22  
23  
24  
25  
26  
27  
28  
29  
30  
31  
32  
33  
34  
35  
36  
37  
38  
39  
40  
41  
42  
43  
44  
45  
46  
47  
48  
49  
50  
51  
52  
53  
54  
55  
56  
57  
58  
59  
60

|                                                                 |            |                                                                                                                                                        |
|-----------------------------------------------------------------|------------|--------------------------------------------------------------------------------------------------------------------------------------------------------|
| <b>TITLE OR</b>                                                 |            |                                                                                                                                                        |
| Page 1, line 1-2                                                | <b>1</b>   | Identification as a study of diagnostic accuracy using at least one measure of accuracy (such as sensitivity, specificity, predictive values, or AUC)  |
| <b>ABSTRACT</b>                                                 |            |                                                                                                                                                        |
| Page 2, line 2-18 for protocol article                          | <b>2</b>   | Structured summary of study design, methods, results, and conclusions (for specific guidance, see STARD for Abstracts)                                 |
| <b>INTRODUCTION</b>                                             |            |                                                                                                                                                        |
| Page 4-5, line 2-21                                             | <b>3</b>   | Scientific and clinical background, including the intended use and clinical role of the index test                                                     |
| Page 5, line 22-page 6, line 3; Page 6, line 17-page 7, line 3  | <b>4</b>   | Study objectives and hypotheses                                                                                                                        |
| <b>METHODS</b>                                                  |            |                                                                                                                                                        |
| <i>Study design</i><br>Page 8, line 3; Page 14, line 13-22      | <b>5</b>   | Whether data collection was planned before the index test and reference standard were performed (prospective study) or after (retrospective study)     |
| <i>Participants</i><br>Page 10, line 1-11                       | <b>6</b>   | Eligibility criteria                                                                                                                                   |
| Page 9, line 12-16                                              | <b>7</b>   | On what basis potentially eligible participants were identified (such as symptoms, results from previous tests, inclusion in registry)                 |
| Page 9, line 12-21                                              | <b>8</b>   | Where and when potentially eligible participants were identified (setting, location and dates)                                                         |
| Page 9, line 12                                                 | <b>9</b>   | Whether participants formed a consecutive, random or convenience series                                                                                |
| <i>Test methods</i><br>Page 8, line 12-page 9, line 6; Figure 1 | <b>10a</b> | Index test, in sufficient detail to allow replication                                                                                                  |
| Page 10, line 12-19; Suppl Fig 1                                | <b>10b</b> | Reference standard, in sufficient detail to allow replication                                                                                          |
| Page 4, line 23-page 5, line 5                                  | <b>11</b>  | Rationale for choosing the reference standard (if alternatives exist)                                                                                  |
| Page 8, line 19-page 9, line 6                                  | <b>12a</b> | Definition of and rationale for test positivity cut-offs or result categories of the index test, distinguishing                                        |
| Suppl Fig 1                                                     | <b>12b</b> | Definition of and rationale for test positivity cut-offs or result categories of the reference standard, distinguishing pre-specified from exploratory |
| Page 9, line 18-21                                              | <b>13a</b> | Whether clinical information and reference standard results were available                                                                             |
| Page 9, line 16-18; Page 12, line 1-3                           | <b>13b</b> | Whether clinical information and index test results were available to the assessors of the reference standard                                          |
| <i>Analysis</i><br>Page 12, line 15-21                          | <b>14</b>  | Methods for estimating or comparing measures of diagnostic accuracy                                                                                    |
| Page 10, line 19                                                | <b>15</b>  | How indeterminate index test or reference standard results were handled                                                                                |
| Page 14, line 10-12                                             | <b>16</b>  | How missing data on the index test and reference standard were handled                                                                                 |
| Page 12, line 15-21                                             | <b>17</b>  | Any analyses of variability in diagnostic accuracy, distinguishing pre-specified from exploratory                                                      |
| Page 13, line 3-13                                              | <b>18</b>  | Intended sample size and how it was determined                                                                                                         |
| <b>RESULTS</b>                                                  |            |                                                                                                                                                        |
| <i>Participants</i>                                             | <b>19</b>  | Flow of participants, using a diagram                                                                                                                  |
| NA                                                              | <b>20</b>  | Baseline demographic and clinical characteristics of participants                                                                                      |
| NA                                                              | <b>21a</b> | Distribution of severity of disease in those with the target condition                                                                                 |
| NA                                                              | <b>21b</b> | Distribution of alternative diagnoses in those without the target condition                                                                            |
| NA                                                              | <b>22</b>  | Time interval and any clinical interventions between index test and reference standard                                                                 |
| <i>Test results</i>                                             | <b>23</b>  | Cross tabulation of the index test results (or their distribution) by the results of the reference standard                                            |

|                                                 |           |                                                                                                       |
|-------------------------------------------------|-----------|-------------------------------------------------------------------------------------------------------|
| NA                                              | <b>24</b> | Estimates of diagnostic accuracy and their precision (such as 95% confidence intervals)               |
| NA                                              | <b>25</b> | Any adverse events from performing the index test or the reference standard                           |
| <b>DISCUSSION</b>                               |           |                                                                                                       |
| Page 17,line 1-16                               | <b>26</b> | Study limitations, including sources of potential bias, statistical uncertainty, and generalisability |
| Page 16,line 2-9;line 18-25; Page 17,line 17-22 | <b>27</b> | Implications for practice, including the intended use and clinical role of the index test             |
| <b>OTHER</b>                                    |           |                                                                                                       |
| Page 2,line 24;Page 18,line 23-24;              | <b>28</b> | Registration number and name of registry                                                              |
| NA                                              | <b>29</b> | Where the full study protocol can be accessed                                                         |
| Page 18,line 15-22                              | <b>30</b> | Sources of funding and other support; role of funders                                                 |

# BMJ Open

## Research Protocol for a Diagnostic Study: Identifying and Measuring the Severity of Somatic Symptom Disorder Using the Self-reported Somatic Symptom Scale-China (SSS-CN)

|                                 |                                                                                                                                                                                                                                                                                                                                                                                                                                                                                                                                                                                                                                                                                                                                                                                 |
|---------------------------------|---------------------------------------------------------------------------------------------------------------------------------------------------------------------------------------------------------------------------------------------------------------------------------------------------------------------------------------------------------------------------------------------------------------------------------------------------------------------------------------------------------------------------------------------------------------------------------------------------------------------------------------------------------------------------------------------------------------------------------------------------------------------------------|
| Journal:                        | <i>BMJ Open</i>                                                                                                                                                                                                                                                                                                                                                                                                                                                                                                                                                                                                                                                                                                                                                                 |
| Manuscript ID                   | bmjopen-2018-024290.R3                                                                                                                                                                                                                                                                                                                                                                                                                                                                                                                                                                                                                                                                                                                                                          |
| Article Type:                   | Protocol                                                                                                                                                                                                                                                                                                                                                                                                                                                                                                                                                                                                                                                                                                                                                                        |
| Date Submitted by the Author:   | 04-Jul-2019                                                                                                                                                                                                                                                                                                                                                                                                                                                                                                                                                                                                                                                                                                                                                                     |
| Complete List of Authors:       | Jiang, Meng; Renji Hospital, School of Medicine, Shanghai Jiaotong University, Department of Cardiology<br>Zhang, Weituo; Clinical Research Center, School of Medicine, Shanghai Jiaotong University<br>Su, Xuan; Renji Hospital, School of Medicine, Shanghai Jiaotong University, Department of Cardiology<br>Gao, Chuang; Clinical Research Center, School of Medicine, Shanghai Jiaotong University<br>Chen, Bingxu; School of Medicine, Shanghai Jiao Tong University<br>Feng, Zehao; Renji Hospital, School of Medicine, Shanghai Jiaotong University, Department of Cardiology<br>Mao, Jialiang; Renji Hospital, School of Medicine, Shanghai Jiaotong University, Department of Cardiology<br>Pu, Jun; Renji Hospital, School of Medicine, Shanghai Jiaotong University |
| <b>Primary Subject Heading</b>: | Mental health                                                                                                                                                                                                                                                                                                                                                                                                                                                                                                                                                                                                                                                                                                                                                                   |
| Secondary Subject Heading:      | Research methods                                                                                                                                                                                                                                                                                                                                                                                                                                                                                                                                                                                                                                                                                                                                                                |
| Keywords:                       | Somatic Symptom Scale-China, somatic symptom disorder, mental disorders management                                                                                                                                                                                                                                                                                                                                                                                                                                                                                                                                                                                                                                                                                              |
|                                 |                                                                                                                                                                                                                                                                                                                                                                                                                                                                                                                                                                                                                                                                                                                                                                                 |

SCHOLARONE™  
Manuscripts

1  
2  
3 1 **Research Protocol for a Diagnostic Study: Identifying and Measuring the Severity of**  
4  
5 2 **Somatic Symptom Disorder Using the Self-reported Somatic Symptom Scale-China (SSS-**  
6  
7 3  
8 **CN)**  
9  
10 4

11  
12 5 Meng Jiang<sup>a1</sup>, MD, PhD, Weituo Zhang<sup>a2</sup>, PhD, Xuan Su<sup>1</sup>, MD, Chuang Gao<sup>2</sup>, MPH, Bingxu  
13  
14 6 Chen<sup>3</sup>, MD, Zehao Feng<sup>1</sup>, MD, Jialiang Mao<sup>\*1</sup>, MD, PhD, Jun Pu<sup>\*1</sup>, MD, PhD  
15  
16  
17 7

18  
19 8 <sup>1</sup> Department of Cardiology, Renji Hospital, School of Medicine, Shanghai Jiao Tong University,  
20  
21 9 Shanghai, China 200127; <sup>2</sup> Clinical Research Center, School of Medicine, Shanghai Jiao Tong  
22  
23 10 University, Shanghai, China 200025; <sup>3</sup> School of Medicine, Shanghai Jiao Tong University,  
24  
25 11 Shanghai, China 200025  
26  
27  
28 12

29  
30 13 <sup>a</sup> Co-first author: Meng Jiang and Weituo Zhang contributed equally to the paper.  
31

32 14 \* Names and addresses correspondence: Jialiang Mao, MD, PhD; Jun Pu, MD, PhD, FACC,  
33  
34 15 FESC; Department of Cardiology, Renji Hospital, School of Medicine, Shanghai Jiaotong  
35  
36 16 University, Shanghai, China; 160 Pujian Road, Shanghai, China, 200127. Tel: 086-21-68383447,  
37  
38 17 Fax: 086-21-68383447; Email: maojl9@yahoo.com.cn; pujdoc16@163.com.  
39  
40  
41 18

42  
43  
44 19 **Word count: 5103**  
45  
46 20  
47 21  
48  
49  
50  
51  
52  
53  
54  
55  
56  
57  
58  
59  
60

## 1 **ABSTRACT**

2 **Introduction** The detection rate of somatic symptom disorder (SSD) in general hospitals is  
3 unsatisfactory. Self-report questionnaires that assess both somatic symptoms and psychological  
4 characteristics will improve the process of screening for SSD. The Somatic Symptom Scale-China  
5 (SSS-CN) questionnaire has been developed to meet this urgent clinical demand. The aim of this  
6 research is to validate the self-reported SSS-CN as a timely and practical instrument that can be  
7 used to identify SSD and to assess the severity of this disorder.

8 **Methods and Analysis** At least 852 patients without organic disease but presenting physical  
9 discomfort will be recruited at a general hospital. Each patient will undergo a DSM-5-guided  
10 physician diagnosis, including disease identification and severity assessment, as the reference  
11 standard. This research will compare the diagnostic performance of the SSS-CN for SSD, the  
12 Patient Health Questionnaire-15 (PHQ-15) and other SSD-related questionnaires. Statistical tests  
13 to measure the area under the curve (AUC) and volume under the surface (VUS) of the receiver  
14 operating curve (ROC) will be used to assess the accuracy of the SSD identification and the  
15 severity assessment, respectively. In addition to this standard diagnostic study, we will conduct  
16 follow-up investigations to explore the effectiveness of the SSS-CN in monitoring treatment  
17 effects.

18  
19  
20 **Ethics and Dissemination** Ethical approval was obtained from the Renji Hospital Human  
21 Research Ethics Committee, approval number 2015016. The findings of this study will be  
22 disseminated via peer-reviewed journals and presented at international conferences.

23 Trial registration number: NCT03513185

24

## 1 **Strengths and Limitations of this Study**

- 2 1. The Somatic Symptom Scale-China (SSS-CN) questionnaire is developed according to the
- 3 DSM-5, and its clinical utility is evaluated herein for the first time.
- 4 2. The SSS-CN will benefit patients by improving their awareness of SSD and their ability to self-
- 5 monitor their symptoms.
- 6 3. The SSS-CN will provide clinicians with an easy-to-use tool that can be completed quickly and
- 7 assess both somatic and psychological components.
- 8 4. Referral bias may be present in this study, as only patients without organic disease will be
- 9 referred to our special clinic.
- 10 5. Treatment effect monitoring will be affected by the bias due to non-random loss to follow-up.

## 12 **Keywords**

13 Somatic Symptom Scale-China; somatic symptom disorder; mental disorders management



## 1 INTRODUCTION

2 Somatic symptom disorder (SSD)<sup>1 2</sup> is a common medical condition observed in general  
3 hospitals. SSD is characterized by symptoms that are often difficult to explain after adequate  
4 evaluation<sup>3</sup>; even when a significant medical disease is present, the patients' symptoms may  
5 nonetheless be unrelated to their disease<sup>2</sup>. The diagnosis of SSD emphasizes the existence of  
6 symptoms and signs (one or multiple somatic symptoms, and abnormal thoughts, feelings, and  
7 behaviours in response to these symptoms)<sup>2</sup>. The current prevalence of this disorder is estimated  
8 to be 5-7%<sup>2</sup> in the general population, and it may be even higher in Asian individuals<sup>4</sup>.

9 In general hospitals, the detection rate of SSD is unsatisfactory due to the diagnostic complexity  
10 of the disease and the lack of adequate training for physicians to evaluate patients with suspected  
11 SSD. Therefore, patients may sustain somatic symptoms without appropriate treatment due to  
12 the unawareness of SSD. The yearly cost of medical care among patients with somatization is  
13 nearly twice as high as the yearly cost among patients without somatization. An estimated \$256  
14 billion in annual medical care costs is attributable to the incremental effects of somatization  
15 alone<sup>1</sup>. Hence, it is highly important that physicians are trained to identify SSD, assess the  
16 symptom severity and treat it in a timely manner; failure to do so can result in high morbidity,  
17 lost productivity, and overutilization of medical resources<sup>5 6</sup>. However, compared to widely  
18 researched disorders such as depression and anxiety, SSD has been far less studied. Follow-up or  
19 treatment studies of this disorder are even scarcer.

20 It is more favourable to have a tool for screening patients suspected of having SSD via accurate  
21 and brief diagnostic questionnaires and to facilitate daily clinical work. One of the aims of the  
22 fifth edition of the Diagnostic and Statistical Manual of Mental Disorders (DSM-5) is to identify  
23 SSD patients and to assess the severity of the disorder<sup>2</sup>. The DSM-5 states that SSD comorbid  
24 with anxiety and depressive disorder (a combination present in approximately 57.7% of SSD  
25 patients)<sup>1</sup> adds severity and complexity to the somatic components. The DSM-5 emphasizes that  
26 it is important to evaluate patients in terms of their psychological situation, behaviour and

1  
2  
3 1 physical condition altogether and then treat the patients according to the severity of the disorder.  
4  
5 2 Furthermore, the DSM-5 emphasizes the evaluation of subjects who have excessive concerns  
6  
7 3 about health issues. However, the DSM-5 is clinically difficult to follow because it requires  
8  
9 4 qualified and experienced physicians to conduct an interview<sup>7</sup>, which makes clinicians in general  
10  
11 5 hospitals feel less confident when treating patients who are suspected to have SSD. In particular,  
12  
13 6 individuals in China and other Asian countries tend to refuse psychological counselling<sup>4 8</sup>; thus,  
14  
15 7 many patients with psychological symptoms have been treated by non-psychiatric physicians in  
16  
17 8 general medical hospitals. A series of studies has focused on this issue; the Patient Health  
18  
19 9 Questionnaire-15 (PHQ-15) and the Somatic Symptom Scale-8 are screening tools for SSD<sup>9 10</sup>;  
20  
21 10 however, these self-report questionnaires do not assess psychological features. The Whiteley  
22  
23 11 Index-7 focuses on health anxiety<sup>11</sup>; the Scale for the Assessment of Illness Behavior  
24  
25 12 questionnaires focuses on excessive illness behaviour; and the Somatic Symptom Scale-12  
26  
27 13 assesses psychological features<sup>12 13</sup>. The latter three questionnaires focus less on physical features.  
28  
29 14 Recent studies, including one by Laferton et al., have indicated that self-report measures that  
30  
31 15 focus on different aspects could increase diagnostic quality in clinical practice<sup>14</sup>.  
32  
33 16 Based on published studies, we aim to develop a comprehensive questionnaire to assess somatic  
34  
35 17 symptoms of SSD comorbid with anxiety and depression symptoms. The Somatic Symptom Scale-  
36  
37 18 China (SSS-CN) questionnaire was developed based on the DSM-5. The questionnaire assesses a  
38  
39 19 combination of psychological, behavioural, and somatic symptoms. The questionnaire was  
40  
41 20 designed for use in general medical facilities and to provide clinicians with an easy-to-use  
42  
43 21 questionnaire for detecting both somatic and psychological features in a timely manner.  
44  
45  
46  
47  
48  
49  
50

## 51 **Study Objectives and Research Questions**

52  
53  
54 23 Primary objective  
55  
56  
57  
58  
59  
60

1  
2  
3 1 The primary objective of this study is to test two aspects of the diagnostic accuracy of the SSS-CN  
4  
5 2 compared with the PHQ-15, with a DSM-5-guided physician diagnosis as the reference standard:  
6  
7 3 (1) the accuracy for identifying SSD and (2) the accuracy for assessing SSD severity.  
8  
9

10 4 Secondary objective

11  
12  
13 5 The secondary objective is to explore the potential utility of the SSS-CN in monitoring the  
14  
15 6 treatment effect. We aim to examine how the scores of the SSS-CN and other questionnaires  
16  
17 7 change over time after treatment.  
18  
19

20 8  
21  
22  
23  
24  
25  
26  
27  
28  
29  
30  
31  
32  
33  
34  
35  
36  
37  
38  
39  
40  
41  
42  
43  
44  
45  
46  
47  
48  
49  
50  
51  
52  
53  
54  
55  
56  
57  
58  
59  
60

## 1       2       3       4       5       6       7       8       9       10       11       12       13       14       15       16       17       18       19       20       21       22       23       24       25       26       27       28       29       30       31       32       33       34       35       36       37       38       39       40       41       42       43       44       45       46       47       48       49       50       51       52       53       54       55       56       57       58       59       60

# 1       **METHODS**

### 2       **Study Overview**

3       This study will use a prospective diagnostic design and will be conducted at a tertiary general  
4       hospital in Shanghai, China. The study protocol was approved by the ethics committees of Renji  
5       Hospital, and written informed consent will be obtained from all study participants. The clinical  
6       trial registration can be found at <https://register.clinicaltrials.gov/>, and the registration number is  
7       NCT03513185.

8       Particular attention will be paid to the appropriate storage of the data. Patient confidentiality will  
9       be maintained, and no identifying characteristics of the patients will be published. The protocol  
10      development will adhere to the European Medicines Agency guidelines for diagnosis study<sup>15</sup>.

### 11      **Description of the SSS-CN and Assessment of Severity**

12      The SSS-CN is a somatic and psychological symptom scale (**Figure 1**) derived from the DSM-5.  
13      It is designed to assess the presence and severity of the symptoms. We validated its reliability and  
14      validity in a previous study<sup>16</sup>. The test-retest reliability was 0.9. The correlation coefficients  
15      between each dimension and the total ranged from 0.76-0.88, and the correlation coefficients  
16      within dimensions ranged from 0.56-0.70.

17      The questionnaire is self-administered with an abbreviated 20-item measure. Briefly, in the  
18      previous study, the SSS-CN was composed of 4 dimensions: physical disorder, anxiety disorder,  
19      depression disorder, and anxiety and depression disorder. Half of the items ask about physical  
20      complaints (1 item per body system, items 1, 5, 9, 10, 12, 13, 16, and 18-20). The remaining items  
21      ask about anxiety and depression (anxiety items 6, 14, 15, and 17; depression items 3, 4, 7, and 11;  
22      and anxiety and depression items 2 and 8). Subjects answer the following question: "Since you  
23      have felt unwell, how often have you been bothered in the previous 6 months by any of the  
24      following problems?" For scoring, the subjects rate the frequency of each symptom using the  
25      following response options: 1 ("does not exist"), 2 ("the problem occurred occasionally for a

1 couple of days per month and/or is endurable”), 3 (“the problem occurred almost half of the days  
2 per month and/or I hope it will ease up”) or 4 (“the problem occurred almost every day and/or is  
3 unendurable”). Thus, in determining the SSS-CN score, each question has a score ranging from 1  
4 to 4, corresponding to the frequency of the problem occurrence, and the total score ranges from  
5 20 to 80. The severity of SSD is determined based on the sum of the scores. SSS-CN scores ranging  
6 from 20-29, 30-39, 40-59, and  $\geq 60$  correspond to normal, mild, moderate, and severe SSD,  
7 respectively. The selection of the cutoff value of 30 is based on the results of our previous study  
8 (It was obtained from the receiver operating curve (ROC), reaching a sensitivity of 0.97 and a  
9 specificity of 0.96)<sup>16</sup>. Other cut-offs (40,60) are chosen based on clinical experience rather than  
10 previous research.

## 11 **Study Design**

12 The study is composed of 2 stages (Figure 2) corresponding to the primary and secondary research  
13 objectives. The first stage is a prospective diagnostic stage to assess the diagnostic performance of  
14 the SSS-CN questionnaire. The second stage is an exploratory follow-up stage that uses the SSS-  
15 CN questionnaire as a tool to monitor treatment effects.

16 Briefly, consecutive outpatients with physical discomfort presenting to internal medicine  
17 departments in a tertiary hospital in China will first undergo the corresponding examination to  
18 exclude organic disease. For example, a patient with chest pain will be recommended by a physician  
19 to receive an EKG, echocardiography, a treadmill test or coronary angiography to exclude  
20 cardiovascular disease. Patients with no organic disease that can account for their discomfort will  
21 be considered to have a probable psychosomatic disorder. These patients will then be transferred  
22 to a specialist clinic for the diagnosis and treatment of suspected SSD (the initial consultation).  
23 They will fill out the SSS-CN questionnaire; they will also complete other self-reported  
24 instruments, including the PHQ15, the Patient Health Questionnaire-9 (PHQ-9), the Generalized  
25 Anxiety Disorder Scale-7 (GAD-7) and the SF-20, to verify the structural validity of SSS-CN. Non-

1  
2  
3 1 clinical research assistants will collect the questionnaires and calculate the scores. A physician or a  
4  
5 2 psychologist who is blind to the results of the SSS-CN will separately interview the patient to  
6  
7 3 diagnose SSD using the standard interview criteria put forth in the DSM-5. Prescriptions will be  
8  
9 4 given if the patient is diagnosed with SSD. For patients receiving medications, follow-up visits will  
10  
11 5 be scheduled at 2, 6, and 10 weeks to repeat the questionnaires (the follow-up consultation).  
12  
13 6 Because health-related quality of life is often impaired in patients with SSD, the 20-item Short  
14  
15 7 Form Health Survey (SF-20) will be administered as an indicator of therapeutic effects during  
16  
17 8 follow-up.

## 9 **Participants and Procedure**

### 10 Inclusion criteria

11 (1) Patients aged 18-80 years old; (2) patients who have no previous diagnosis of somatic disease;  
12  
13 (3) patients without systemic disease that can account for their physical discomfort; and (4) patients  
14  
15 enrolled as outpatients after they agree to complete the questionnaires and undergo assessment by  
16  
17 a physician.

### 18 Exclusion criteria

19 (1) Patients who have lost their self-assessment ability or refuse to participate; (2) patients who  
20  
21 have been confirmed to have mental disorders, mental retardation or dementia; (3) patients who  
22  
23 currently take anti-anxiety agents or anti-depression agents; and (4) patients who are unable to  
24  
25 complete face-to-face follow-up visits after at least 1 month.

### 26 Reference standard

27 Patients will be interviewed using the standard procedure. The physician will conduct a structured  
28  
29 clinical interview (SCID-5-CV) in accordance with the corresponding DSM-5 criterion. The  
30  
31 interview questions include modules from somatic symptom and related disorder to depression  
32  
33 disorder, anxiety disorder, obsessive-compulsive related disorder and sleep-wake disorders. The  
34  
35 interview will last approximately 30-45 minutes. The physician will assess the severity based on the

1  
2  
3 1 number of symptoms, i.e., excessive thoughts, feelings, or behaviours related to the somatic  
4  
5 2 symptoms or associated health concerns (mild: one symptom; moderate: two or more of the  
6  
7 3 symptoms; severe: two or more of the symptoms plus multiple somatic complaints). The physician  
8  
9 4 assessment will be used as the reference standard. The physician team will be composed of both  
10  
11 5 general hospital “specified physicians” (that is, physicians qualified as national psychological  
12  
13 6 counsellors) and psychologists. When there is diagnostic uncertainty, the patient will be referred  
14  
15 7 to the senior physician to obtain a diagnosis.  
16  
17  
18

### 19 8 Obtaining informed consent

20  
21  
22 9 A trained researcher will obtain informed consent and provide all necessary information about this  
23  
24 10 study to the potential participants. It will be made clear to participants that they are under no  
25  
26 11 obligation to take part, their usual care will not be affected by their decision, and they can withdraw  
27  
28 12 consent without giving a reason. Participants will be given a sheet with contact details for the  
29  
30 13 research team and instructions on what to do if they wish to withdraw or require further  
31  
32 14 information.  
33  
34  
35

### 36 15 Blinding

37  
38 16 After a patient with suspected SSD is transferred to the specialist clinic, the patient will first  
39  
40 17 complete the questionnaires in a separate room, and the research assistant will help the patient  
41  
42 18 understand the questions. Then, an initial consultation will be conducted by a physician who has  
43  
44 19 been qualified as a national psychological counsellor and who has been blinded to the patient’s  
45  
46 20 responses to the SSS-CN. An independent diagnosis and severity assessment will be made by the  
47  
48 21 physician. The durations of the self-reported scale and the physician assessment will be recorded  
49  
50 22 separately.  
51  
52  
53

### 54 23 Medication

55  
56  
57 24 The patients will be informed of the results immediately after the physician consultation and the  
58  
59 25 questionnaire. During the follow-up consultations, the patients will be allowed to communicate

1  
2  
3 1 with the doctor throughout the diagnosis and treatment. Because patients in China usually refuse  
4  
5 2 to accept psychotherapy<sup>4 8</sup>, medications will be prescribed according to the physician's evaluation.  
6  
7 3 Anti-anxiety treatment or anti-depression treatment will be selectively administered according to  
8  
9 4 the severity of the somatic symptoms. Generally, drugs that are classified as thioxanthenes, such  
10  
11 5 as Deanxit, are prescribed for mild symptoms; selective serotonin reuptake inhibitors (SSRIs) are  
12  
13 6 prescribed for moderate symptoms; and serotonin-norepinephrine reuptake inhibitors (SNRIs) are  
14  
15 7 prescribed for severe symptoms. Serotonin antagonist and reuptake inhibitors (SARIs) are  
16  
17 8 prescribed for sleeping problems.  
18  
19  
20

### 21 9 **Follow-up**

22  
23  
24 10 A face-to-face interview will be scheduled at 2, 6, and 10 weeks for patients taking medication.  
25  
26 11 The patient will complete 5 questionnaires (SSS-CN, PHQ15, PHQ-9, GAD-7 and SF-20) both at  
27  
28 12 the initial consultation and at the week 10 follow-up. The SF-20 aims to evaluate the respondent's  
29  
30 13 quality of life. At week 2 and week 6, the patient will complete 4 questionnaires (SSS-CN, PHQ15,  
31  
32 14 PHQ-9, GAD-7).  
33  
34  
35

### 36 15 **Outcome Measures**

#### 37 16 Reliability and validity

38  
39  
40  
41 17 Reliability will be measured by Cronbach's alpha. A randomized sample of approximately 100  
42  
43 18 participants will be asked to complete the questionnaires 1 week after the initial completion to  
44  
45 19 analyse the test-retest reliability.  
46  
47

48  
49 20 The criterion validity will be determined by comparing the presence and severity of SSD between  
50  
51 21 the reference standard (physician assessment based on structure interview) and the SSS-CN  
52  
53 22 questionnaire.  
54

55  
56 23 The SSS-CN consists of 10 items assessing somatic symptoms, 4 items assessing depression, 4  
57  
58 24 items assessing anxiety, and 2 items assessing depression and anxiety. The construct validity will  
59  
60



1 be tested by confirmatory factor analysis, comparing the corresponding factors with the PHQ-15,  
2  
3  
4  
5  
6  
7  
8  
9  
10  
11  
12  
13  
14  
15  
16  
17  
18  
19  
20  
21  
22  
23  
24  
25  
26  
27  
28  
29  
30  
31  
32  
33  
34  
35  
36  
37  
38  
39  
40  
41  
42  
43  
44  
45  
46  
47  
48  
49  
50  
51  
52  
53  
54  
55  
56  
57  
58  
59  
60

1 be tested by confirmatory factor analysis, comparing the corresponding factors with the PHQ-15,  
2 PHQ-9 and GAD-7.

### 3 Diagnostic performance

4 The diagnostic accuracy of a questionnaire for SSD identification is measured by the area under  
5 the curve (AUC) of an ROC, the sensitivity/specificity under a prespecified cutoff value, and the  
6 positive/negative predictive values in the study population, using the physician diagnosis as the  
7 reference standard. The accuracy of the severity assessment of a questionnaire is measured by the  
8 volume under the surface (VUS), which is a multiclass generalization of AUC of a ROC between  
9 the questionnaire score and the physician's severity assessment<sup>17</sup>.

### 10 Other Clinical utilities

11 Convenience in clinical practice is measured by the average time taken to complete each  
12 questionnaire or receive a diagnosis from a physician.

13 Clinical utility in monitoring treatment efficacy in patients is measured by assessing the correlation  
14 with the SF-20 during follow-up visits.

### 15 Sample Size Calculation

16 The sample size calculation considers the comparison of diagnostic accuracy for both SSD  
17 identification and severity assessment, whichever is larger. In the pilot study, the prevalence of  
18 SSD was 76.9% among patients who were referred to the special clinics (where physicians qualified  
19 as national psychological counsellors and psychologists practice medicine); the AUC of the ROC  
20 for the PHQ-15 was 0.88; and the VUS of the multiclass ROC for the PHQ-15 with respect to the  
21 severity assessment was 0.7. The correlation between the SSS-CN and PHQ-15 scores was 0.6.  
22 With a non-inferiority margin of 0.05,  $\alpha=0.025$ , and  $\beta=0.8$ , the sample size for SSD diagnosis was  
23 852. With a non-inferiority margin of 0.1,  $\alpha=0.025$ , and  $\beta=0.8$ , the sample size for severity  
24 assessment was 517. Therefore, as the overall sample size of this study was N=852 with SSD-

1  
2  
3 1 positive N+=655 and SSD-negative N-=197, both the positive and negative sample size  
4  
5 2 requirements were met.  
6  
7

### 8 3 **Statistical Analysis**

9

10 4 We will report our results according to STARD. We will compute the median (P25, P75) scores  
11  
12 5 for each questionnaire and the number and percentage of patients (%) in each diagnostic category  
13  
14 6 as descriptive statistics.  
15  
16

17 7 Reliability will be measured using Cronbach's  $\alpha$ . The criterion validity will be measured by the  
18  
19 8 kappa coefficient between the questionnaire score and the physician assessment. Construct validity  
20  
21 9 will be tested using confirmatory factor analyses.  
22  
23  
24

25 10 The primary analysis of the diagnostic performance will consist of two comparisons using  
26  
27 11 Bonferroni's correction: (1) the non-inferior comparison of the SSS-CN with the PHQ-15 with  
28  
29 12 respect to SSD diagnostic accuracy, as measured by the AUC of the ROC with  $\Delta=0.05$ ,  $\alpha=0.025$   
30  
31 13 in the whole study population using Delong's method<sup>18</sup>; and (2) severity of PHQ-15 based on  
32  
33 14 scores (normal: 0–4; low: 5–9; medium: 10–14; high: 15–30). SSS-CN scores ranging from 20 to  
34  
35 15 29, 30 to 39, 40 to 59, and  $\geq 60$  correspond to normal, mild, moderate, and severe SSD, respectively.  
36  
37 16 The non-inferior comparison will also be conducted between the SSS-Ch and the PHQ-15 with  
38  
39 17 respect to SSD severity, as measured by the VUS with  $\Delta=0.1$ ,  $\alpha=0.025$  in the population with a  
40  
41 18 confirmed SSD diagnosis using a Z-test<sup>17</sup>. Both comparisons will use the physician's diagnosis as  
42  
43 19 the reference standard. If neither non-inferiority criterion is met, the corresponding superiority  
44  
45 20 will be tested.  
46  
47  
48  
49

50 21 As a secondary analysis, the sensitivity, specificity, and positive and negative predictive values will  
51  
52 22 also be determined. Prespecified cutoff values will be validated. In the follow-up data,  
53  
54 23 questionnaire scores by time will be demonstrated in a line chart with error bars.  
55  
56  
57  
58  
59  
60

1  
2  
3 1 Missing values will be imputed with multiple imputation under the assumption of MAR<sup>17</sup>.  
4  
5 2 Subgroup analysis according to gender and age will also be conducted. All statistical analyses will  
6  
7 be performed with R (version 3.5.1)  
8  
9

#### 10 **Patient and Public Involvement Statement**

11  
12  
13 5 Patients were involved at the design stage of the trial, including ensuring that the content of the  
14  
15 6 SSS-CN questionnaire can be understood and that the length of the consultation time, the  
16  
17 7 manner of notification of the disease condition, the follow-up method, and the dissemination of  
18  
19 8 the results are acceptable. Before the formal recruitment started, we received feedback from  
20  
21 9 patients who had SSD during a pretest of the case report form (CRF), and this feedback was  
22  
23 10 used to improve the final design of the CRF. We carefully assessed the burden of the trial  
24  
25 11 interventions on patients. We intend to disseminate the main results to the trial participants via  
26  
27 12 email. The study outcomes will be disseminated in conference reports and academic publications.  
28  
29  
30

31 **Ethics and Dissemination** Ethical approval was obtained from the Renji Hospital Human  
32  
33 14 Research Ethics Committee, approval number 2015016. The findings of this study will be  
34  
35 15 disseminated via peer-reviewed journals and presented at international conferences.  
36  
37  
38

#### 39 **Current Status**

40  
41 17 The first study participant was enrolled in November 2017. As of June 2019, patient recruitment  
42  
43 18 has not been completed.  
44  
45  
46  
47  
48  
49  
50  
51  
52  
53  
54  
55  
56  
57  
58  
59  
60

## 1 DISCUSSION

2 In this study protocol, we describe a diagnostic study design that evaluates the efficacy of a newly  
3 developed somatic and psychological symptom scale adapted to China for patients with suspected  
4 somatic diseases. This scale might be applied as a first-line instrument for screening and monitoring  
5 treatment efficacy in individual outpatient consultations. We expect that physicians will benefit  
6 from the SSS-CN on a clinically significant level in the form of improved self-confidence and  
7 timeliness; participants will benefit from this scale in the form of improved awareness of the  
8 disease and improved ability to self-monitor their symptoms. Moreover, we will compare the  
9 characteristics of the SSS-CN with another somatic symptom questionnaire, namely, the PHQ15.

10 The SSS-CN is designed as a “one-stop shop” tool that combines somatic items with mental  
11 disorder items. This design is consistent with the suggestion in the DSM-5 that somatic symptoms  
12 are likely accompanied by depression and anxiety<sup>1</sup>. Somatic and mental symptoms may interact,  
13 and mental symptoms may be triggered differently from conventional mental diseases among SSD  
14 patients. Clinically, it is not easy to clearly separate the body from mental status, and the  
15 significance of each item is unknown. We caution that 50% of mental items may increase the  
16 incidence of SSD, and a subgroup score with only somatic symptom items is used for this appraisal.

17 In our study, there is no plan to supplement medication treatment of psychotherapy. This is  
18 because there are societal and cultural culture differences in response to psychotherapy between  
19 Asian and non-Asian patients. The Chinese World Mental Health Survey (2001–02) conducted in  
20 Beijing and Shanghai found that only 3.4% of respondents with a psychiatric disorder sought  
21 professional help during the previous 12 months<sup>19</sup>. Similarly, in a large epidemiologic study  
22 conducted in four provinces of China[63004 participants aged 18 years or older in 96 urban  
23 neighbourhoods and 267 rural villages], only 8% of individuals with mental disorders sought  
24 professional help within the general healthcare setting, and only 5% sought help from mental  
25 health professionals (mainly hospital-based psychiatrists)<sup>20</sup>. Second, Chinese and Asian Americans

1  
2  
3 1 are likely to drop out and prematurely terminate psychotherapy services<sup>8</sup>. Third, there is a shortage  
4  
5 2 of psychiatrists, psychiatric nurses, and counselling and clinical psychologists to provide  
6  
7 3 psychotherapy<sup>21</sup>. In particular, China had only 1.49 psychiatrists per 100 000 people, while, on  
8  
9 4 average, middle- and high-income countries worldwide have 2.03 psychiatrists per 100 000. Finally,  
10  
11 5 insurance currently pays for treatment with medication but typically does not support  
12  
13 6 psychotherapy, community recovery services, or preventive care.

14  
15  
16  
17 7 The study has several strengths. First, we introduce a tool to facilitate daily clinical work. The tool  
18  
19 8 provides clinicians with an easy-to-use questionnaire for screening suspected SSD patients and  
20  
21 9 referring the patients to specific doctors. Second, our previous study showed the reliability and  
22  
23 10 factorial validity of the SSS-CN by utilizing an early version of it<sup>16</sup>. The current study further  
24  
25 11 modifies the SSS-CN based on the DSM-5 and, for the first time, evaluates its clinical utility. Third,  
26  
27 12 patients will benefit from the SSS-CN in the form of improved awareness of the disease and  
28  
29 13 improved ability to self-monitor their symptoms.

30  
31  
32  
33 14 This trial has some limitations. First, SSD can be accompanied by diagnosed medical disorders.  
34  
35 15 The current study, however, represents the efficacy of the SSS-CN only in patients without  
36  
37 16 organic diseases. Therefore, further research on the application of SSS-CN in patients with both  
38  
39 17 SSD and diagnosed medical disorders is required. Moreover, the epidemiology of primary  
40  
41 18 healthcare facilities is different from the epidemiology of general hospitals; therefore, the  
42  
43 19 diagnostic accuracy in a health care sample requires additional investigation. Second, the study  
44  
45 20 was designed as a mid-term investigation with four measurement time points; thus, missing data  
46  
47 21 must be considered. Because only 16% of patients in the primary care evaluation of mental  
48  
49 22 disorders (PRIME-MD) study were involved in the follow-up<sup>22</sup>, we estimate that there will be a  
50  
51 23 high rate of missing data in our study. Because of the difficulty with compliance, only a small  
52  
53 24 fraction (approximately 16%) of patients in study would be involved in the follow-up, and the  
54  
55 25 result of monitoring the treatment effect may be affected by loss to follow-up.  
56  
57  
58  
59  
60

1  
2  
3 1 This study will help to clarify whether the SSS-CN is an effective tool for rapidly screening and  
4  
5 2 assessing the severity of symptoms in patients with suspected SSD in a general hospital clinic and  
6  
7 3 during follow-up. If the SSS-CN is found to be effective, it can be implemented as a first-line  
8  
9 4 screening and follow-up option. Additionally, we expect that the SSS-CN could provide  
10  
11 5 personalized information to consulting physicians in a timely manner. The study results will  
12  
13 6 contribute to better outpatient care for patients with SSD.  
14  
15  
16  
17 7  
18  
19  
20  
21  
22  
23  
24  
25  
26  
27  
28  
29  
30  
31  
32  
33  
34  
35  
36  
37  
38  
39  
40  
41  
42  
43  
44  
45  
46  
47  
48  
49  
50  
51  
52  
53  
54  
55  
56  
57  
58  
59  
60

For peer review only

1  
2  
3 **Acknowledgements:** We thank all the patients who participated and advised us throughout the  
4 study design and implementation for their contributions.  
5  
6

7 **Conflict of interests:** The authors declare that they have no competing interests.  
8  
9

10 **Ethical approval:** Ethical approval was provided by the Renji Hospital Human Research Ethics  
11 Committee, approval number 2015016.  
12  
13

14 **Consent for publication:** All participants to date have provided written informed consent.  
15

16 **Authors' contributions:** MJ: substantial contributions to the conception, design and  
17 interpretation of data, drafting and critical revisions for important intellectual content. WTZ:  
18 analysis, statistics and interpretation of data, drafting the manuscript. XS: design and  
19 implementation of study, acquisition of data, analysis and interpretation of data, drafting the  
20 manuscript. CG: analysis, statistics and interpretation of data. BXC: acquisition of data, analysis  
21 and interpretation of data, drafting the manuscript. ZHF: acquisition of data, analysis and  
22 interpretation of data, drafting the manuscript. JLM: substantial contributions to the conception,  
23 design and interpretation of data, critical revisions for important intellectual content. JP: substantial  
24 contributions to the conception, design and interpretation of data.  
25  
26  
27  
28  
29  
30  
31  
32  
33  
34  
35

36 **Funding:** This work was supported by the National Natural Science Foundation of China  
37 (81470391 and 81470389); National Science Fund for Distinguished Young Scholars (81625002);  
38 Shanghai ShenKang Hospital Development Center (16CR3020A and 16CR3034A); Shanghai  
39 Municipal Education Commission Gaofeng Clinical Medicine Grant Support (20172014 and  
40 20152209); Shanghai Outstanding Academic Leaders Program (18XD1402400); Shanghai Sailing  
41 Program(17YF1410500); Shanghai Pudong Health Development Center (PW2018D-03); Shanghai  
42 Jiao Tong University (YG2016QN78, YG2016MS45 and YG2015ZD04).  
43  
44  
45  
46  
47  
48  
49  
50  
51

52 **Registration name:** The validation and utility of the Somatic Symptom Scale-China (SSS-CN) for  
53 assessing somatic symptom disorder in general hospital outpatients.  
54  
55  
56  
57  
58  
59  
60

## REFERENCES

1. Barsky AJ, Orav EJ, Bates DW. Somatization increases medical utilization and costs independent of psychiatric and medical comorbidity. *Archives of general psychiatry* 2005;62(8):903-10. doi: 10.1001/archpsyc.62.8.903
2. American Psychiatric Association: Diagnostic and Statistical Manual of Mental Disorders, Fifth Edition (DSM-5). Arlington, VA: American Psychiatric Association Publishing 2013.
3. Barsky AJ. Assessing somatic symptoms in clinical practice. *JAMA Intern Med* 2014;174(3):407-8. doi: 10.1001/jamainternmed.2013.12177
4. Liang D, Mays VM, Hwang WC. Integrated mental health services in China: challenges and planning for the future. *Health Policy Plan* 2018;33(1):107-22. doi: 10.1093/heapol/czx137
5. Jr SG. The course of somatization and its effects on utilization of health care resources. *Psychosomatics* 1994;35(3):263.
6. Hahn SR, Kroenke K, Spitzer RL, et al. The difficult patient: prevalence, psychopathology, and functional impairment. *Journal of General Internal Medicine* 1996;11(1):1.
7. Axelsson E, Andersson E, Ljotsson B, et al. The health preoccupation diagnostic interview: inter-rater reliability of a structured interview for diagnostic assessment of DSM-5 somatic symptom disorder and illness anxiety disorder. *Cogn Behav Ther* 2016;45(4):259-69. doi: 10.1080/16506073.2016.1161663
8. Leong FT, Lau AS. Barriers to providing effective mental health services to Asian Americans. *Ment Health Serv Res* 2001;3(4):201-14.
9. Gierk B, Kohlmann S, Kroenke K, et al. The somatic symptom scale-8 (SSS-8): a brief measure of somatic symptom burden. *JAMA Intern Med* 2014;174(3):399-407. doi: 10.1001/jamainternmed.2013.12179
10. Gierk B, Kohlmann S, Toussaint A, et al. Assessing somatic symptom burden: a psychometric comparison of the patient health questionnaire-15 (PHQ-15) and the somatic symptom scale-8 (SSS-8). *J Psychosom Res* 2015;78(4):352-5. doi: 10.1016/j.jpsychores.2014.11.006
11. Tu CY, Liao SC, Liu CY, et al. Application of the Chinese Version of the Whiteley Index-7 for Detecting DSM-5 Somatic Symptom and Related Disorders. *Psychosomatics* 2016;57(3):283-91. doi: 10.1016/j.psym.2015.12.010
12. Toussaint A, Murray AM, Voigt K, et al. Development and Validation of the Somatic Symptom Disorder-B Criteria Scale (SSD-12). *Psychosom Med* 2016;78(1):5-12. doi: 10.1097/PSY.0000000000000240
13. Toussaint A, Lowe B, Brahler E, et al. The Somatic Symptom Disorder - B Criteria Scale (SSD-12): Factorial structure, validity and population-based norms. *J Psychosom Res* 2017;97:9-17. doi: 10.1016/j.jpsychores.2017.03.017
14. Laferton JAC, Stenzel NM, Rief W, et al. Screening for DSM-5 Somatic Symptom Disorder: Diagnostic Accuracy of Self-Report Measures Within a Population Sample. *Psychosom Med* 2017;79(9):974-81. doi: 10.1097/PSY.0000000000000530
15. European Medicines Agency. Pre-authorisation Evaluation of Medicines for Human Use: Guideline on clinical evaluation of diagnostic agents. [http://www.ema.europa.eu/docs/en\\_GB/document\\_library/Scientific\\_guideline/2009/09/WC500003584.pdf](http://www.ema.europa.eu/docs/en_GB/document_library/Scientific_guideline/2009/09/WC500003584.pdf).
16. Qi Z, Jialiang M, Chunbo L, et al. Developing of somatic self-rating scale and its reliability and validity. *Chinese Journal of Behavioral Medicine and Brain Science* 2010;19(9):847-9.



17. Nakas CT, Yiannoutsos CT. Ordered multiple-class ROC analysis with continuous measurements. *Stat Med* 2004;23(22):3437-49. doi: 10.1002/sim.1917
18. DeLong ER, DeLong DM, Clarke-Pearson DL. Comparing the areas under two or more correlated receiver operating characteristic curves: a nonparametric approach. *Biometrics* 1988;44(3):837-45.
19. Shen YC, Zhang MY, Huang YQ, et al. Twelve-month prevalence, severity, and unmet need for treatment of mental disorders in metropolitan China. *Psychol Med* 2006;36(2):257-67. doi: 10.1017/S0033291705006367
20. Phillips MR, Zhang J, Shi Q, et al. Prevalence, treatment, and associated disability of mental disorders in four provinces in China during 2001-05: an epidemiological survey. *Lancet* 2009;373(9680):2041-53. doi: 10.1016/S0140-6736(09)60660-7
21. Liu C, Chen L, Xie B, et al. Number and characteristics of medical professionals working in Chinese mental health facilities. *Shanghai Arch Psychiatry* 2013;25(5):277-85. doi: 10.3969/j.issn.1002-0829.2013.05.003
22. Spitzer RL, Kroenke K, Williams JB. Validation and utility of a self-report version of PRIME-MD: the PHQ primary care study. Primary Care Evaluation of Mental Disorders. Patient Health Questionnaire. *Jama* 1999;282(18):1737-44.

1  
2  
3 **Figure Legends**  
4

5  
6 **Figure 1** The Somatic Symptom Scale-China (SSS-CN).  
7

8 **Figure 2** Study flow. SSS-CN, Somatic Symptom Scale-China; PHQ-15: Patient Health  
9 Questionnaire-15; PHQ-9: Patient Health Questionnaire-9; GAD-7: Generalized Anxiety  
10 Disorder Scale-7; SF-20: 20-Item Short Form Health Survey; SSD: Somatic Symptom Disorder.  
11  
12  
13  
14  
15  
16  
17  
18  
19  
20  
21  
22  
23  
24  
25  
26  
27  
28  
29  
30  
31  
32  
33  
34  
35  
36  
37  
38  
39  
40  
41  
42  
43  
44  
45  
46  
47  
48  
49  
50  
51  
52  
53  
54  
55  
56  
57  
58  
59  
60

For peer review only

**Self-rating Somatic Symptoms Scale**

**1. Basic information**

Name \_\_\_\_\_ Mobile phone \_\_\_\_\_ Gender \_\_\_\_ Age \_\_\_\_ Education level \_\_\_\_\_ Occupation \_\_\_\_\_  
 Date \_\_\_\_ Course of symptoms \_\_\_\_ Number of Self-rating \_\_\_\_ Historical diagnosis \_\_\_\_\_  
 Medications administered \_\_\_\_\_

**2. Instruction:**

To better understand the degree to which you're bothered by the problems, please read carefully the following 20 items and CIRCLE the corresponding points at the right column that best describe your health. All the items listed in this questionnaire are REQUIRED.

- 1: not existent
- 2: the problem occurred occasionally for a couple of days per-month and/or is endurable
- 3: the problem occurred almost half days per-month and/or hoping to ease up
- 4: the problem occurred almost every day and/or unendurable

In the past 6 month, do you have the following symptoms:

|     |                                                                                                                                                  |   |   |   |   |
|-----|--------------------------------------------------------------------------------------------------------------------------------------------------|---|---|---|---|
| 1)  | Dizziness, swelling in the head, heavy head, headache, spinning head, faint, buzzing in head                                                     | 1 | 2 | 3 | 4 |
| 2)  | Trouble sleeping (difficulty falling asleep/staying asleep, waking up too early, oversleeping, easily dream, nightmare, awakened for no reason ) | 1 | 2 | 3 | 4 |
| 3)  | Feeling tired or having low energy                                                                                                               | 1 | 2 | 3 | 4 |
| 4)  | Losing interest, moody, don't want to be bothered, lacking patience                                                                              | 1 | 2 | 3 | 4 |
| 5)  | Chest pain, shortness of breath, racing/pounding/fluttering heart, chest tightness                                                               | 1 | 2 | 3 | 4 |
| 6)  | Easily anxious, nervous, feeling scared, panicky, feeling I'm going to die, out of control                                                       | 1 | 2 | 3 | 4 |
| 7)  | Worried, apprehensive, negative ideation                                                                                                         | 1 | 2 | 3 | 4 |
| 8)  | Reduced attention & thinking abilities, forgetful, absentminded                                                                                  | 1 | 2 | 3 | 4 |
| 9)  | Bloating, stomach pain, gas, loss of appetite, constipation, loose bowels, nausea, becoming thin, dry or bitter mouth                            | 1 | 2 | 3 | 4 |
| 10) | Pain in the neck, back, shoulders, waist, arm, legs                                                                                              | 1 | 2 | 3 | 4 |
| 11) | Sensitive, easily sad and crying                                                                                                                 | 1 | 2 | 3 | 4 |
| 12) | Unusual sensations in the joints of hands or legs (numb, rigid, twitching, shivering, pricking, chilly)                                          | 1 | 2 | 3 | 4 |
| 13) | Blurry vision, eye dryness, eye pain or swelling, decreased eye vision over a short period of time                                               | 1 | 2 | 3 | 4 |
| 14) | Easily agitated or irritable, sensitive to voice, susceptible to startle                                                                         | 1 | 2 | 3 | 4 |
| 15) | Obsessive-compulsive thoughts or behaviors                                                                                                       | 1 | 2 | 3 | 4 |
| 16) | Skin allergies, itching, rash, skin flushing, hot flash, sweating                                                                                | 1 | 2 | 3 | 4 |
| 17) | Excess concerns about health issues, excessive worry that you or family members are ill                                                          | 1 | 2 | 3 | 4 |
| 18) | Difficulty breathing, feeling oppressed or suffocated, frequent long sigh, coughing, intercostal pain                                            | 1 | 2 | 3 | 4 |
| 19) | Choking feeling in the throat, nasal dryness and obstruction, ringing in the ears or ear blockage                                                | 1 | 2 | 3 | 4 |
| 20) | Frequent urination, urgent need to urinate, painful urination, or discomfort in perineum                                                         | 1 | 2 | 3 | 4 |

Functional impairment in work, study, family life, and interpersonal relationship: Not at all, A little bit, Quite a bit, or Very much/Severe

Figure 1

210x297mm (300 x 300 DPI)

1  
2  
3  
4  
5  
6  
7  
8  
9  
10  
11  
12  
13  
14  
15  
16  
17  
18  
19  
20  
21  
22  
23  
24  
25  
26  
27  
28  
29  
30  
31  
32  
33  
34  
35  
36  
37  
38  
39  
40  
41  
42  
43  
44  
45  
46  
47  
48  
49  
50  
51  
52  
53  
54  
55  
56  
57  
58  
59  
60

Figure 2

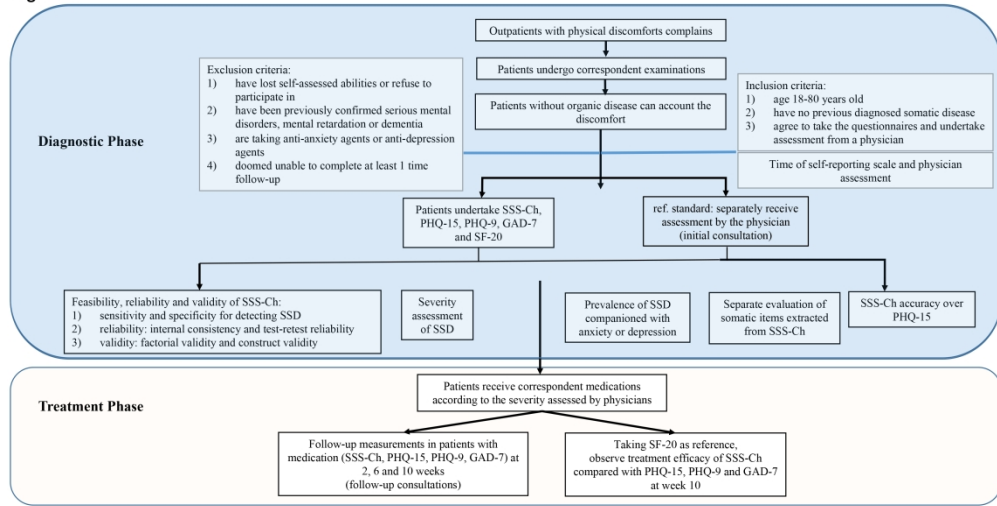

Figure 2

338x190mm (300 x 300 DPI)

| Section & Topic                                             | No  | Item                                                                                                                                                   |
|-------------------------------------------------------------|-----|--------------------------------------------------------------------------------------------------------------------------------------------------------|
| <b>TITLE OR ABSTRACT</b>                                    |     |                                                                                                                                                        |
| Page 2, line 12-15                                          | 1   | Identification as a study of diagnostic accuracy using at least one measure of accuracy (such as sensitivity, specificity, predictive values, or AUC)  |
| <b>ABSTRACT</b>                                             |     |                                                                                                                                                        |
| Page 2                                                      | 2   | Structured summary of study design, methods, results, and conclusions (for specific guidance, see STARD for Abstracts)                                 |
| <b>INTRODUCTION</b>                                         |     |                                                                                                                                                        |
| Page 4, line 2-page 5, line 21                              | 3   | Scientific and clinical background, including the intended use and clinical role of the index test                                                     |
| Page 5, line 22-Page 6, line 7                              | 4   | Study objectives and hypotheses                                                                                                                        |
| <b>METHODS</b>                                              |     |                                                                                                                                                        |
| <i>Study design</i><br>Page 8, line 13-14, pros             | 5   | Whether data collection was planned before the index test and reference standard were performed (prospective study) or after (retrospective study)     |
| <i>Participants</i><br>Page 9, line 10-14                   | 6   | Eligibility criteria                                                                                                                                   |
| Page 8, line 16-21                                          | 7   | On what basis potentially eligible participants were identified (such as symptoms, results from previous tests, inclusion in registry)                 |
| Page 8, line 21-22                                          | 8   | Where and when potentially eligible participants were identified (setting, location and dates)                                                         |
| Page 8, line 16, consecutive                                | 9   | Whether participants formed a consecutive, random or convenience series                                                                                |
| <i>Test methods</i><br>Page 7, line 11-Page 8, line 10      | 10a | Index test, in sufficient detail to allow replication                                                                                                  |
| Page 9, line 20-Page 10, line 7                             | 10b | Reference standard, in sufficient detail to allow replication                                                                                          |
| Page 9, line 21-24                                          | 11  | Rationale for choosing the reference standard (if alternatives exist)                                                                                  |
| Page 8, line 7-10                                           | 12a | Definition of and rationale for test positivity cut-offs or result categories of the index test, distinguishing pre-specified from                     |
| Page 10, line 1-3                                           | 12b | Definition of and rationale for test positivity cut-offs or result categories of the reference standard, distinguishing pre-specified from exploratory |
| Page 8, line 25-Page 9, line 1                              | 13a | Whether clinical information and reference standard results were available to the performers/readers of the index test                                 |
| Page 9, line 1-3                                            | 13b | Whether clinical information and index test results were available to the assessors of the reference standard                                          |
| <i>Analysis</i><br>Page 12, line 3-9<br>Page 13, line 10-20 | 14  | Methods for estimating or comparing measures of diagnostic accuracy                                                                                    |
| Page 10, line 6-7                                           | 15  | How indeterminate index test or reference standard results were handled                                                                                |
| Page 14, line 1                                             | 16  | How missing data on the index test and reference standard were handled                                                                                 |
| Page 14, line 2                                             | 17  | Any analyses of variability in diagnostic accuracy, distinguishing pre-specified from exploratory                                                      |
| Page 12, line 15-Page 13, line 2                            | 18  | Intended sample size and how it was determined                                                                                                         |
| <b>RESULTS</b>                                              |     |                                                                                                                                                        |
| <i>Participants</i><br>NA                                   | 19  | Flow of participants, using a diagram                                                                                                                  |
| NA                                                          | 20  | Baseline demographic and clinical characteristics of participants                                                                                      |
| NA                                                          | 21a | Distribution of severity of disease in those with the target condition                                                                                 |
| NA                                                          | 21b | Distribution of alternative diagnoses in those without the target condition                                                                            |
| NA                                                          | 22  | Time interval and any clinical interventions between index test and reference standard                                                                 |
| <i>Test results</i><br>NA                                   | 23  | Cross tabulation of the index test results (or their distribution) by the results of the reference standard                                            |
| NA                                                          | 24  | Estimates of diagnostic accuracy and their precision (such as 95% confidence intervals)                                                                |
| NA                                                          | 25  | Any adverse events from performing the index test or the reference standard                                                                            |
| <b>DISCUSSION</b>                                           |     |                                                                                                                                                        |
| Page 16, line 15-Page 17, line 2                            | 26  | Study limitations, including sources of potential bias, statistical uncertainty, and generalisability                                                  |
| Page 17, line 3-8                                           | 27  | Implications for practice, including the intended use and clinical role of the index test                                                              |
| <b>OTHER INFORMATION</b>                                    |     |                                                                                                                                                        |
| Page 2, line 23; Page 18, last 2 lines                      | 28  | Registration number and name of registry                                                                                                               |

1  
2  
3  
4  
5  
6  
7  
8  
9  
10  
11  
12  
13  
14  
15  
16  
17  
18  
19  
20  
21  
22  
23  
24  
25  
26  
27  
28  
29  
30  
31  
32  
33  
34  
35  
36  
37  
38  
39  
40  
41  
42  
43  
44  
45  
46  
47  
48  
49  
50  
51  
52  
53  
54  
55  
56  
57  
58  
59  
60

|                  |           |                                                       |
|------------------|-----------|-------------------------------------------------------|
| Page 7, line 5-7 | <b>29</b> | Where the full study protocol can be accessed         |
| Page 18          | <b>30</b> | Sources of funding and other support; role of funders |

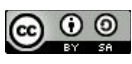

For peer review only

# STARD 2015

---

## AIM

STARD stands for “Standards for Reporting Diagnostic accuracy studies”. This list of items was developed to contribute to the completeness and transparency of reporting of diagnostic accuracy studies. Authors can use the list to write informative study reports. Editors and peer-reviewers can use it to evaluate whether the information has been included in manuscripts submitted for publication.

---

## EXPLANATION

A **diagnostic accuracy study** evaluates the ability of one or more medical tests to correctly classify study participants as having a **target condition**. This can be a disease, a disease stage, response or benefit from therapy, or an event or condition in the future. A medical test can be an imaging procedure, a laboratory test, elements from history and physical examination, a combination of these, or any other method for collecting information about the current health status of a patient.

The test whose accuracy is evaluated is called **index test**. A study can evaluate the accuracy of one or more index tests. Evaluating the ability of a medical test to correctly classify patients is typically done by comparing the distribution of the index test results with those of the **reference standard**. The reference standard is the best available method for establishing the presence or absence of the target condition. An accuracy study can rely on one or more reference standards.

If test results are categorized as either positive or negative, the cross tabulation of the index test results against those of the reference standard can be used to estimate the **sensitivity** of the index test (the proportion of participants *with* the target condition who have a positive index test), and its **specificity** (the proportion *without* the target condition who have a negative index test). From this cross tabulation (sometimes referred to as the contingency or “2x2” table), several other accuracy statistics can be estimated, such as the positive and negative **predictive values** of the test. Confidence intervals around estimates of accuracy can then be calculated to quantify the statistical **precision** of the measurements.

If the index test results can take more than two values, categorization of test results as positive or negative requires a **test positivity cut-off**. When multiple such cut-offs can be defined, authors can report a receiver operating characteristic (ROC) curve which graphically represents the combination of sensitivity and specificity for each possible test positivity cut-off. The **area under the ROC curve** informs in a single numerical value about the overall diagnostic accuracy of the index test.

The **intended use** of a medical test can be diagnosis, screening, staging, monitoring, surveillance, prediction or prognosis. The **clinical role** of a test explains its position relative to existing tests in the clinical pathway. A replacement test, for example, replaces an existing test. A triage test is used before an existing test; an add-on test is used after an existing test.

Besides diagnostic accuracy, several other outcomes and statistics may be relevant in the evaluation of medical tests. Medical tests can also be used to classify patients for purposes other than diagnosis, such as staging or prognosis. The STARD list was not explicitly developed for these other outcomes, statistics, and study types, although most STARD items would still apply.

---

## DEVELOPMENT

This STARD list was released in 2015. The 30 items were identified by an international expert group of methodologists, researchers, and editors. The guiding principle in the development of STARD was to select items that, when reported, would help readers to judge the potential for bias in the study, to appraise the applicability of the study findings and the validity of conclusions and recommendations. The list represents an update of the first version, which was published in 2003.

More information can be found on <http://www.equator-network.org/reporting-guidelines/stard>.

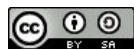

Supplement: bmjopen-2018-024290.draft_revisions.pdf [file bmjopen-2018-024290.draft_revisions.pdf]
